# Supplementary material for: Modelling subglacial fluvial sediment transport with a graph-based model, Graphical Subglacial Sediment Transport (GraphSSeT)
Source: Copernicus journal article supplement (doi:10.5194/tc-18-4111-2024), 2024-09-12
Supplement: Supplementary file 1 [file tc-18-4111-2024-supplement.pdf]

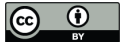

*Supplement of*

## **Modelling subglacial fluvial sediment transport with a graph-based model, Graphical Subglacial Sediment Transport (GraphSSeT)**

**Alan Robert Alexander Aitken et al.**

*Correspondence to:* Alan Robert Alexander Aitken ([alan.aitken@uwa.edu.au](mailto:alan.aitken@uwa.edu.au))

The copyright of individual parts of the supplement might differ from the article licence.

## Contents

|    |                                                  |           |
|----|--------------------------------------------------|-----------|
|    | <b>S1 Figures for the input hydrology models</b> | <b>4</b>  |
|    | S1.1 A-Series models . . . . .                   | 4         |
| 5  | S1.1.1 A4 . . . . .                              | 4         |
|    | S1.1.2 A5 . . . . .                              | 5         |
|    | S1.1.3 A7 . . . . .                              | 6         |
|    | S1.1.4 A8 . . . . .                              | 7         |
|    | S1.1.5 A6 . . . . .                              | 8         |
| 10 | S1.1.6 Edge-betweenness Centrality . . . . .     | 9         |
|    | S1.1.7 L1 and L2 networks . . . . .              | 10        |
|    | S1.2 B-Series models . . . . .                   | 11        |
|    | S1.2.1 B1 . . . . .                              | 11        |
|    | S1.2.2 B2 . . . . .                              | 12        |
| 15 | S1.2.3 B3 . . . . .                              | 13        |
|    | S1.2.4 B4 . . . . .                              | 14        |
|    | S1.2.5 B5 . . . . .                              | 15        |
|    | S1.2.6 Edge-betweenness Centrality . . . . .     | 16        |
|    | S1.2.7 L1 and L2 networks . . . . .              | 17        |
|    | S1.3 C-Series models . . . . .                   | 18        |
| 20 | S1.3.1 C series beginning and C0 . . . . .       | 18        |
|    | S1.3.2 C1 end . . . . .                          | 19        |
|    | S1.3.3 C2 end . . . . .                          | 20        |
|    | S1.3.4 C3 end . . . . .                          | 21        |
|    | S1.3.5 C4 end . . . . .                          | 22        |
| 25 | S1.3.6 Edge-betweenness Centrality . . . . .     | 23        |
|    | S1.3.7 L1 and L2 networks . . . . .              | 24        |
|    | <b>S2 Experiment Sets</b>                        | <b>25</b> |
|    | S2.1 Experiment Set 1 . . . . .                  | 25        |
| 30 | S2.1.1 A4 reference . . . . .                    | 25        |
|    | S2.1.2 A4 default . . . . .                      | 26        |
|    | S2.1.3 A4 default rerun . . . . .                | 27        |
|    | S2.1.4 A4D default . . . . .                     | 28        |
|    | S2.1.5 A4D default rerun . . . . .               | 29        |
| 35 | S2.1.6 A5 reference . . . . .                    | 30        |
|    | S2.1.7 A5 default . . . . .                      | 31        |
|    | S2.1.8 A5 default rerun . . . . .                | 32        |
|    | S2.1.9 A5D default . . . . .                     | 33        |
|    | S2.1.10 A5D default rerun . . . . .              | 34        |
| 40 | S2.1.11 A7 reference . . . . .                   | 35        |
|    | S2.1.12 A7 default . . . . .                     | 36        |
|    | S2.1.13 A7 default rerun . . . . .               | 37        |
|    | S2.1.14 A7D default . . . . .                    | 38        |
|    | S2.1.15 A7D default rerun . . . . .              | 39        |
| 45 | S2.1.16 A8 reference . . . . .                   | 40        |
|    | S2.1.17 A8 default . . . . .                     | 41        |
|    | S2.1.18 A8 default rerun . . . . .               | 42        |
|    | S2.1.19 A8D default . . . . .                    | 43        |

|      |                                                                 |    |
|------|-----------------------------------------------------------------|----|
|      | S2.1.20 A8D default rerun . . . . .                             | 44 |
|      | S2.1.21 A6 reference . . . . .                                  | 45 |
| 50   | S2.1.22 A6 default . . . . .                                    | 46 |
|      | S2.1.23 A6 default rerun . . . . .                              | 47 |
|      | S2.1.24 A6D default . . . . .                                   | 48 |
|      | S2.1.25 A6D default rerun . . . . .                             | 49 |
| S2.2 | Experiment Set 2 . . . . .                                      | 50 |
| 55   | S2.2.1 $\phi = 3.2$ . . . . .                                   | 50 |
|      | S2.2.2 $\phi = 1.2$ . . . . .                                   | 51 |
|      | S2.2.3 $\zeta = 1$ . . . . .                                    | 52 |
|      | S2.2.4 $\zeta = 2$ . . . . .                                    | 53 |
|      | S2.2.5 $\rho_s = 2550$ . . . . .                                | 54 |
| 60   | S2.2.6 $\rho_s = 2750$ . . . . .                                | 55 |
|      | S2.2.7 $h_s = 0.05$ . . . . .                                   | 56 |
|      | S2.2.8 $h_s = 0.5$ . . . . .                                    | 57 |
|      | S2.2.9 $\Delta\sigma = 0.005$ . . . . .                         | 58 |
|      | S2.2.10 $\Delta\sigma = 0.01$ . . . . .                         | 59 |
| 65   | S2.2.11 Erosion scaling $\dot{e} = 1e^{-7}u_b^{2.02}$ . . . . . | 60 |
|      | S2.2.12 Erosion scaling $\dot{e} = 1e^{-4}u_b$ . . . . .        | 61 |
|      | S2.2.13 Erosion scaling $\dot{e} = 2e^{-4}u_b$ . . . . .        | 62 |
| S2.3 | Experiment Set 3 . . . . .                                      | 63 |
|      | S2.3.1 B1 reference . . . . .                                   | 63 |
| 70   | S2.3.2 B1 default . . . . .                                     | 64 |
|      | S2.3.3 B1 default rerun . . . . .                               | 65 |
|      | S2.3.4 B1D default . . . . .                                    | 66 |
|      | S2.3.5 B2 reference . . . . .                                   | 67 |
|      | S2.3.6 B2 default . . . . .                                     | 68 |
| 75   | S2.3.7 B2 default rerun . . . . .                               | 69 |
|      | S2.3.8 B2D default . . . . .                                    | 70 |
|      | S2.3.9 B3 reference . . . . .                                   | 71 |
|      | S2.3.10 B3 default . . . . .                                    | 72 |
|      | S2.3.11 B3 default rerun . . . . .                              | 73 |
| 80   | S2.3.12 B3D default . . . . .                                   | 74 |
|      | S2.3.13 B4 reference . . . . .                                  | 75 |
|      | S2.3.14 B4 default . . . . .                                    | 76 |
|      | S2.3.15 B4 default rerun . . . . .                              | 77 |
|      | S2.3.16 B4D default . . . . .                                   | 78 |
| 85   | S2.3.17 B5 reference . . . . .                                  | 79 |
|      | S2.3.18 B5 default . . . . .                                    | 80 |
|      | S2.3.19 B5 default rerun . . . . .                              | 81 |
|      | S2.3.20 B5D default . . . . .                                   | 82 |
| S2.4 | Experiment Set 4 . . . . .                                      | 83 |
| 90   | S2.4.1 C0 reference . . . . .                                   | 83 |
|      | S2.4.2 C0 default . . . . .                                     | 84 |
|      | S2.4.3 C0D default . . . . .                                    | 85 |
|      | S2.4.4 C1 reference . . . . .                                   | 86 |
|      | S2.4.5 C1 default . . . . .                                     | 87 |
| 95   | S2.4.6 C1D default . . . . .                                    | 88 |
|      | S2.4.7 C2 reference . . . . .                                   | 89 |

|                                |    |
|--------------------------------|----|
| S2.4.8 C2 default . . . . .    | 90 |
| S2.4.9 C2D default . . . . .   | 91 |
| S2.4.10 C3 reference . . . . . | 92 |
| S2.4.11 C3 default . . . . .   | 93 |
| S2.4.12 C3D default . . . . .  | 94 |
| S2.4.13 C4 reference . . . . . | 95 |
| S2.4.14 C4 default . . . . .   | 96 |
| S2.4.15 C4D default . . . . .  | 97 |

## S1.1 A-Series models

## S1.1.1 A4

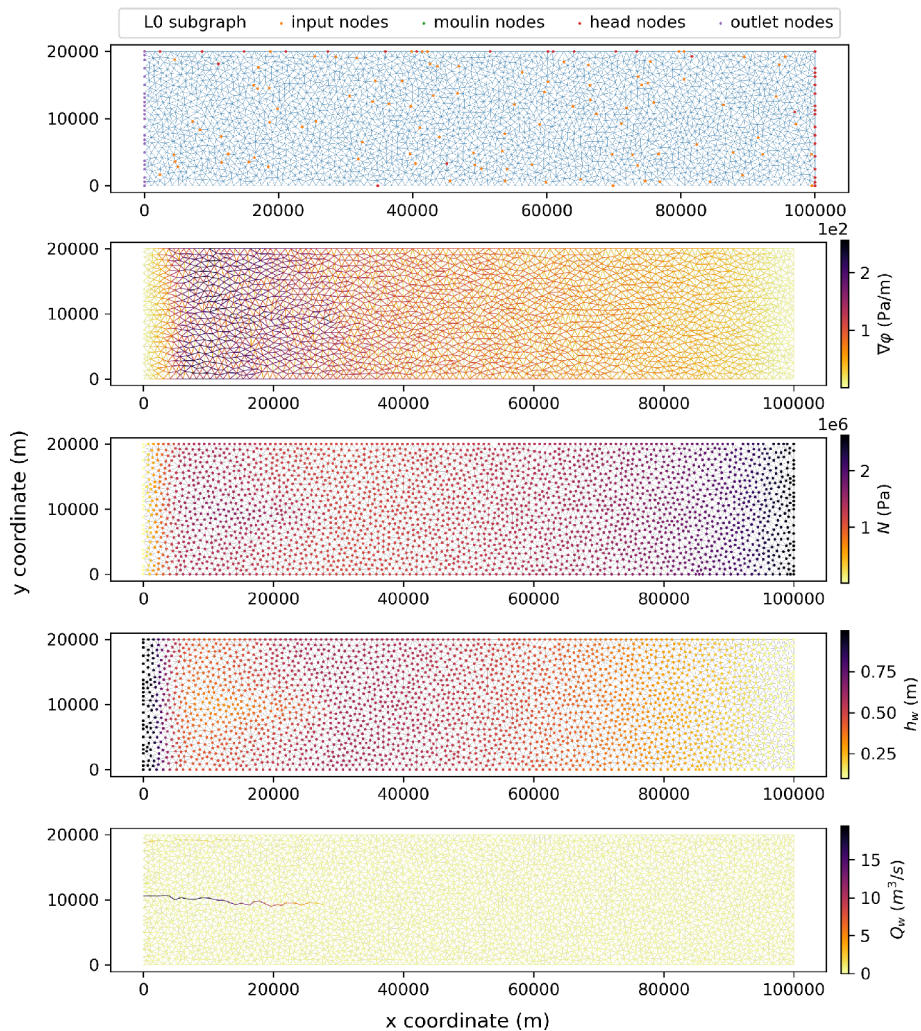

**Figure S1.** Graph representation of the model scenario A4 showing a) network geometry, b) the hydraulic potential gradient (Pa/m) on edges c) effective pressure (Pa) on nodes d) thickness of distributed water flow 'sheet' (m) on nodes and e) the channelised water flux on edges ( $\text{m}^3/\text{s}$ )

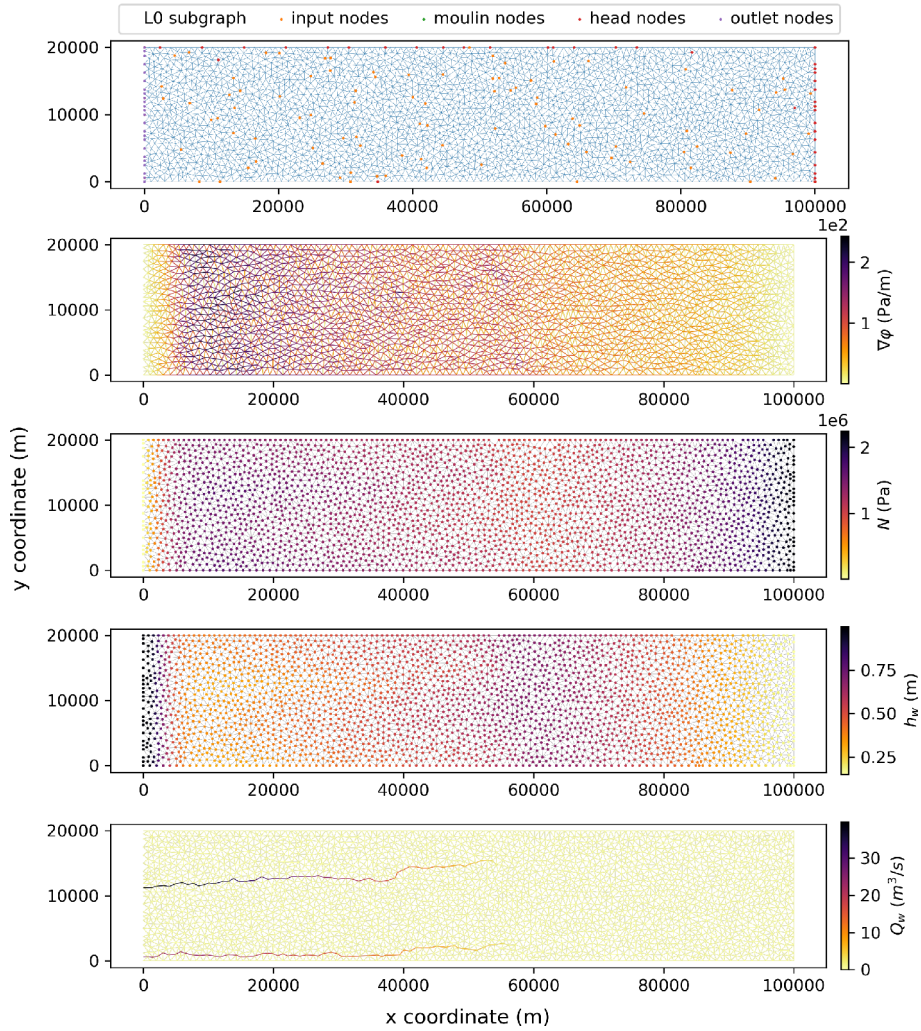

110

**Figure S2.** Graph representation of the model scenario A5 showing a) network geometry, b) the hydraulic potential gradient (Pa/m) on edges c) effective pressure (Pa) on nodes d) thickness of distributed water flow 'sheet' (m) on nodes and e) the channelised water flux on edges ( $\text{m}^3/\text{s}$ )

S1.1.3 A7

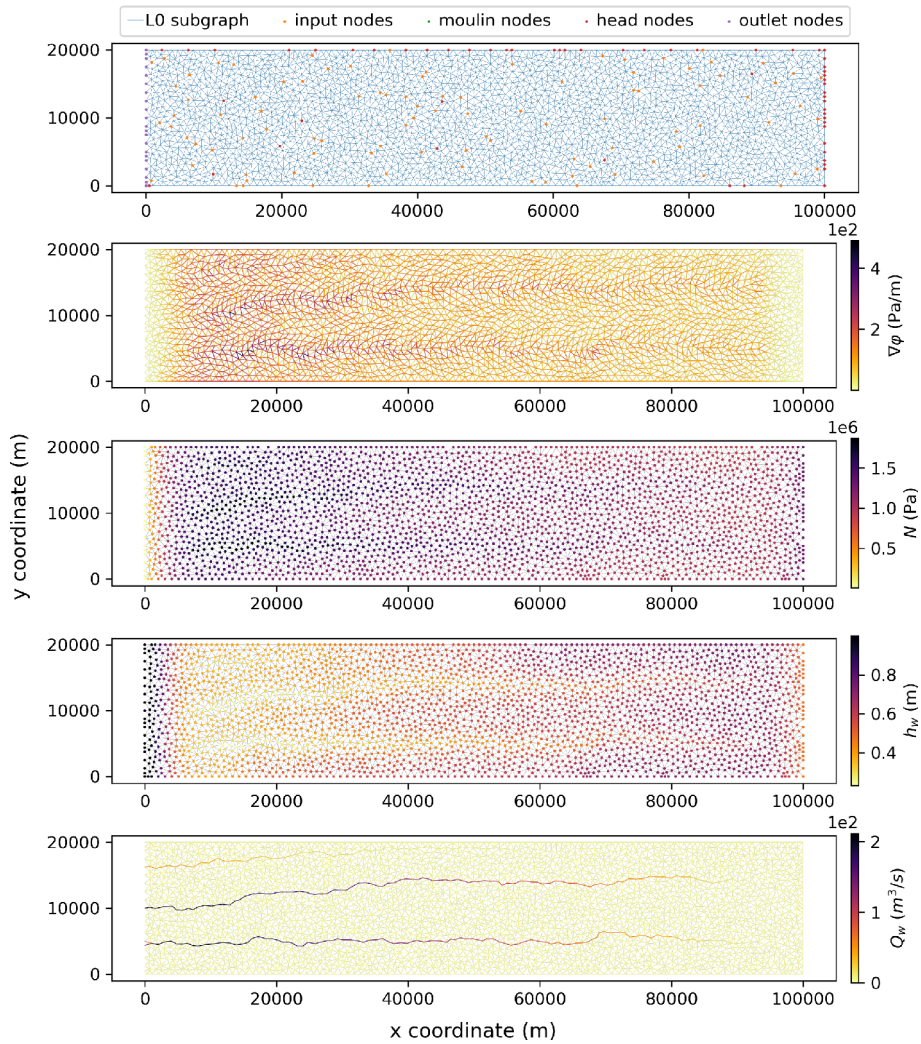

**Figure S3.** Graph representation of the model scenario A7 showing a) network geometry, b) the hydraulic potential gradient (Pa/m) on edges c) effective pressure (Pa) on nodes d) thickness of distributed water flow 'sheet' (m) on nodes and e) the channelised water flux on edges ( $m^3/s$ )

S1.1.4 A8

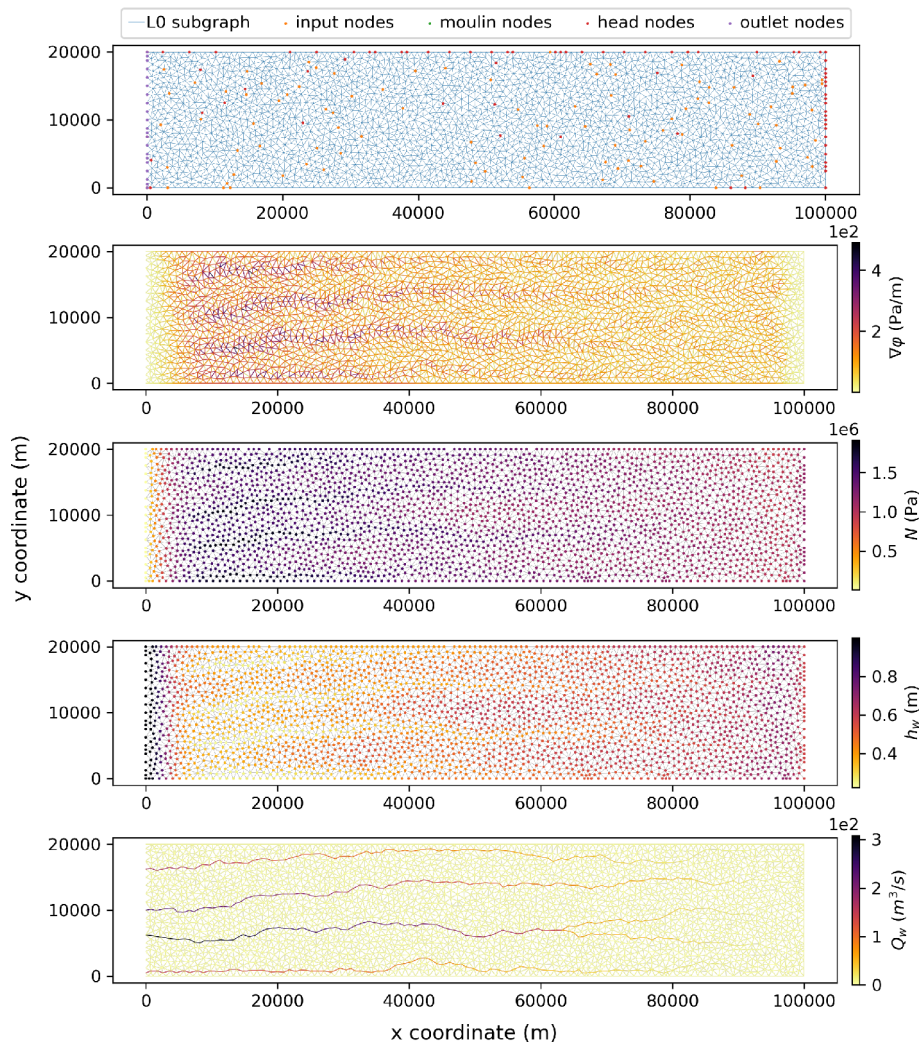

**Figure S4.** Graph representation of the model scenario A8 showing a) network geometry, b) the hydraulic potential gradient (Pa/m) on edges c) effective pressure (Pa) on nodes d) thickness of distributed water flow 'sheet' (m) on nodes and e) the channelised water flux on edges ( $\text{m}^3/\text{s}$ )



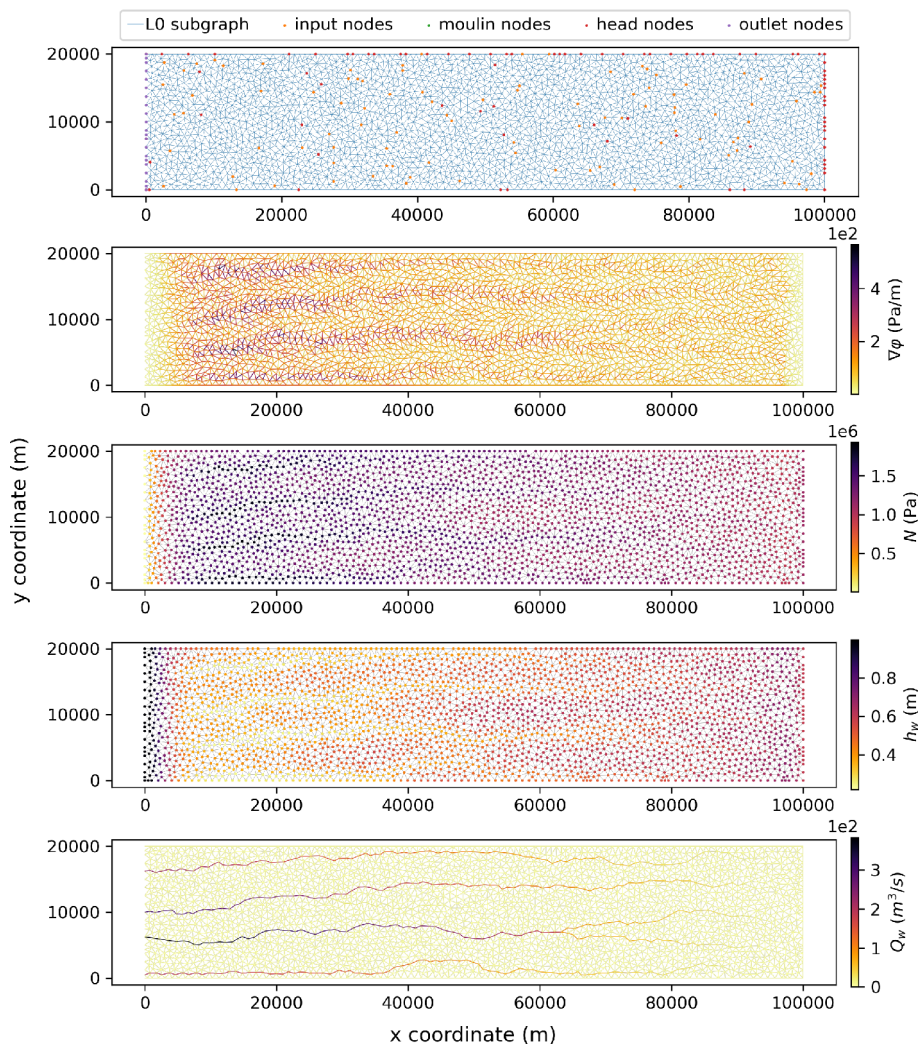

**Figure S5.** Graph representation of the model scenario A6 showing a) network geometry, b) the hydraulic potential gradient (Pa/m) on edges c) effective pressure (Pa) on nodes d) thickness of distributed water flow 'sheet' (m) on nodes and e) the channelised water flux on edges ( $\text{m}^3/\text{s}$ )

### S1.1.6 Edge-betweenness Centrality

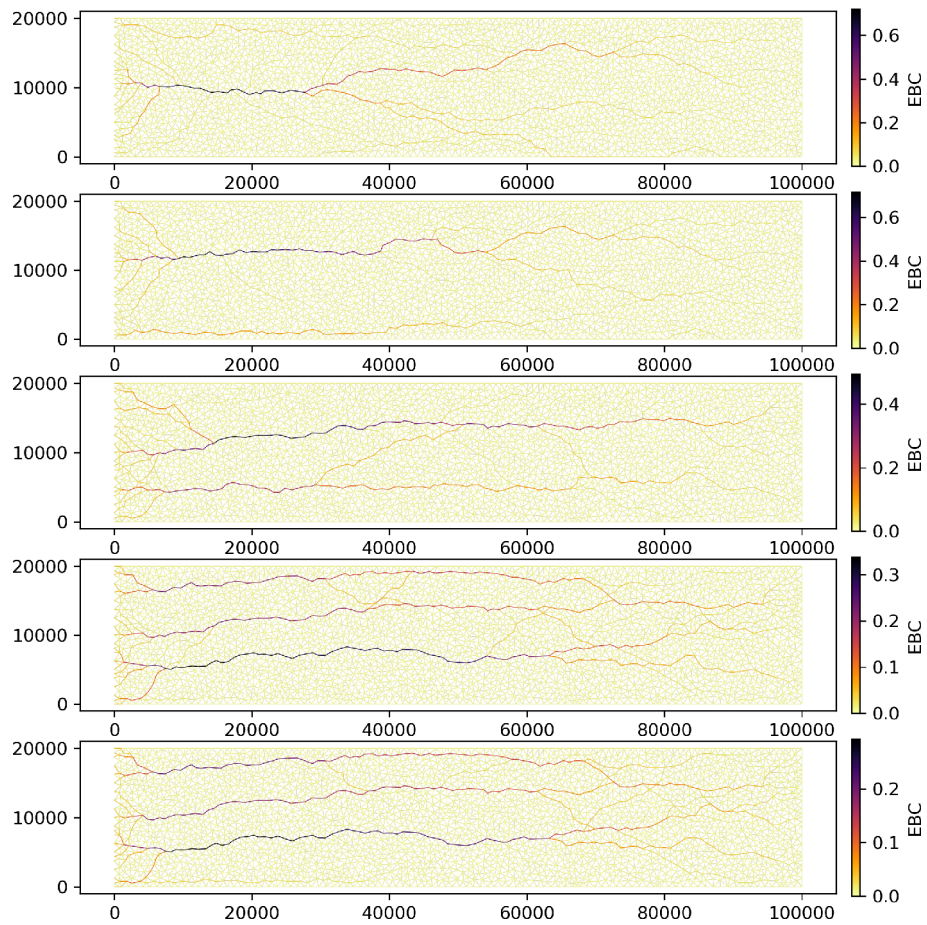

120

**Figure S6.** Edge-betweenness centrality (EBC) with increasing flux a) A4 b) A5 c) A7 d) A8 and e) A6

### S1.1.7 L1 and L2 networks

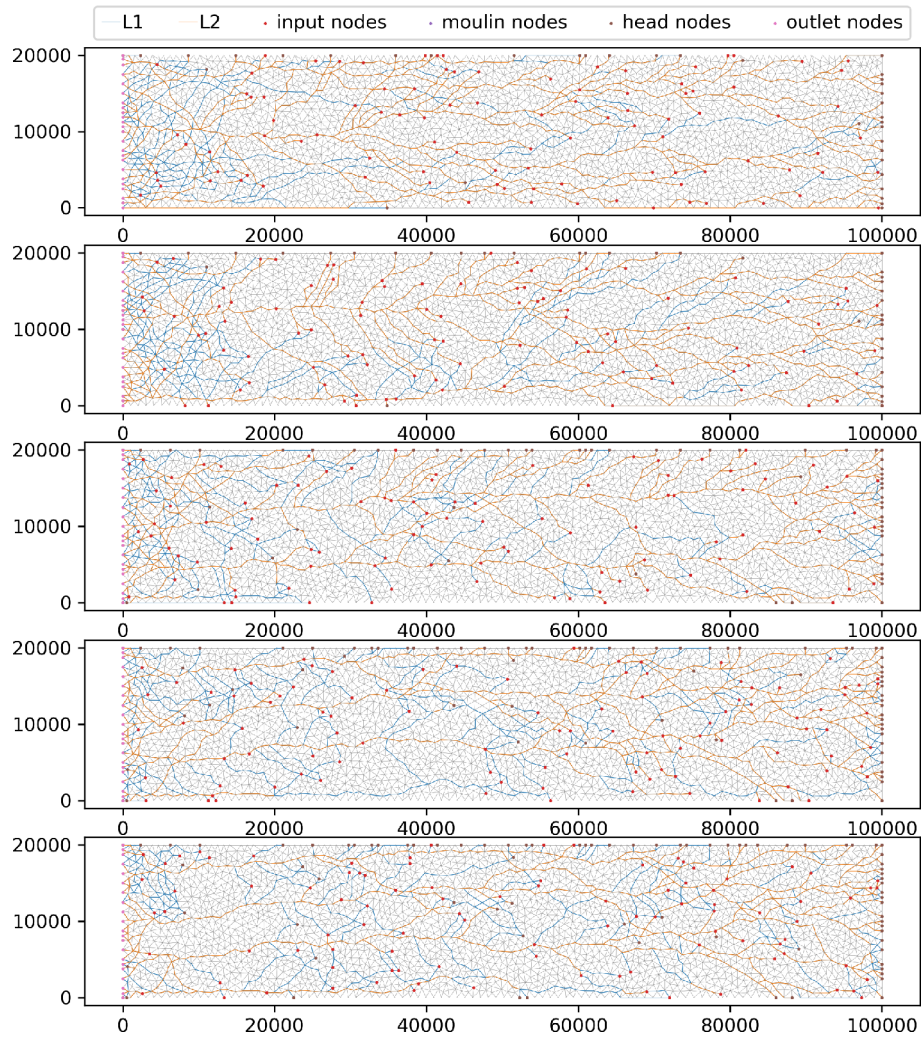

125

**Figure S7.** L1 and L2 networks for increasing flux a) A4 b) A5 c) A7 d) A8 and e) A6

## S1.2 B-Series models

### 130 S1.2.1 B1

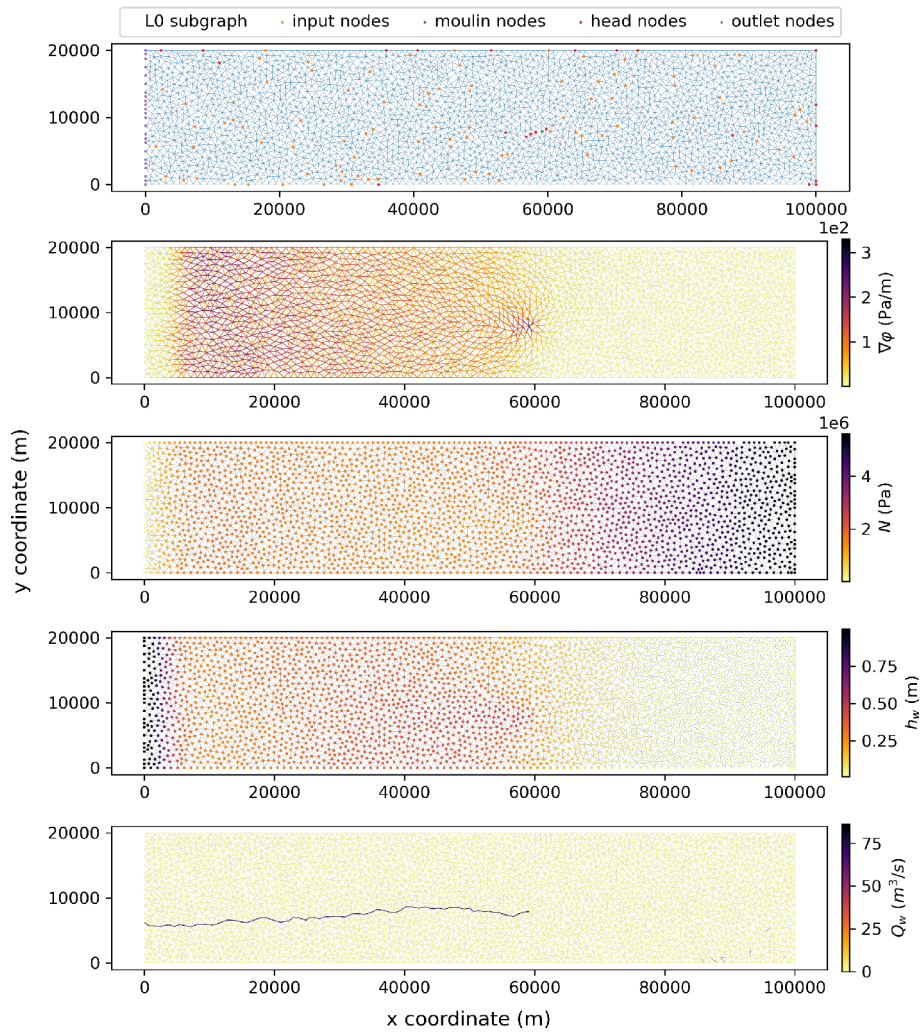

**Figure S8.** Graph representation of the model scenario B1 showing a) network geometry, b) the hydraulic potential gradient (Pa/m) on edges c) effective pressure (Pa) on nodes d) thickness of distributed water flow 'sheet' (m) on nodes and e) the channelised water flux on edges ( $m^3/s$ )

## S1.2.2 B2

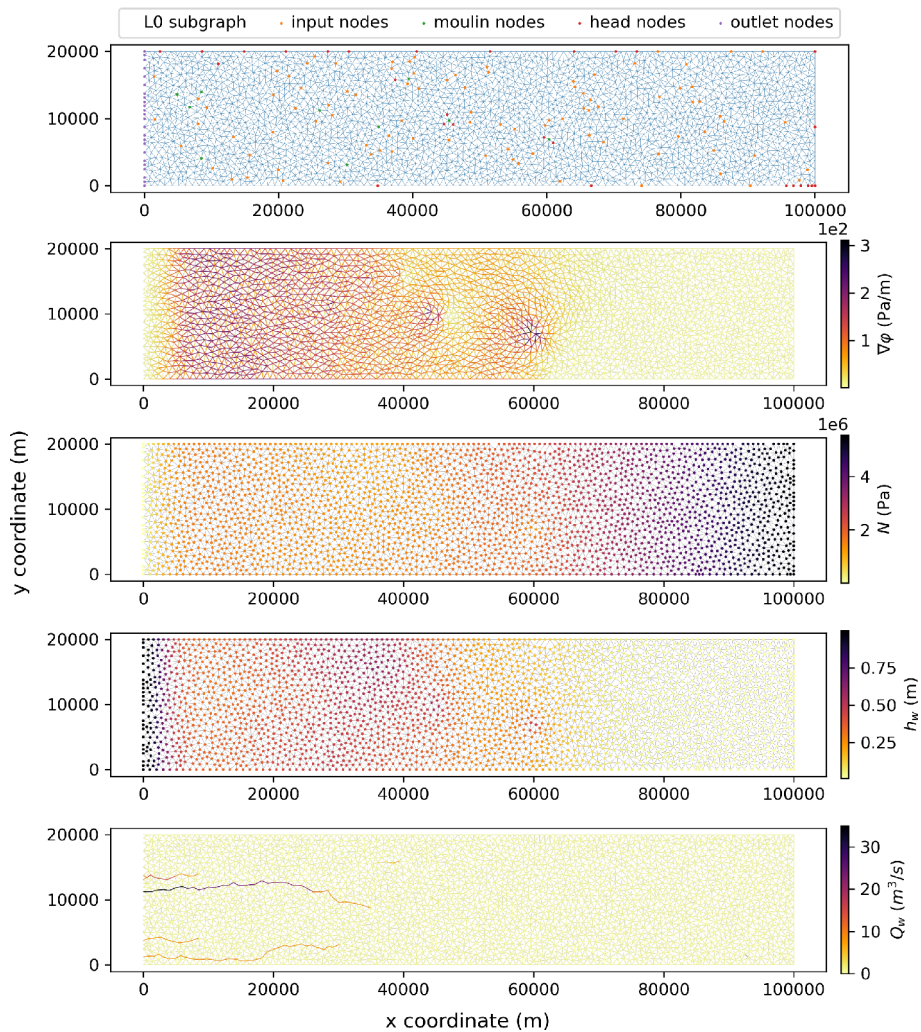

**Figure S9.** Graph representation of the model scenario B2 showing a) network geometry, b) the hydraulic potential gradient (Pa/m) on edges c) effective pressure (Pa) on nodes d) thickness of distributed water flow 'sheet' (m) on nodes and e) the channelised water flux on edges ( $\text{m}^3/\text{s}$ )

### S1.2.3 B3

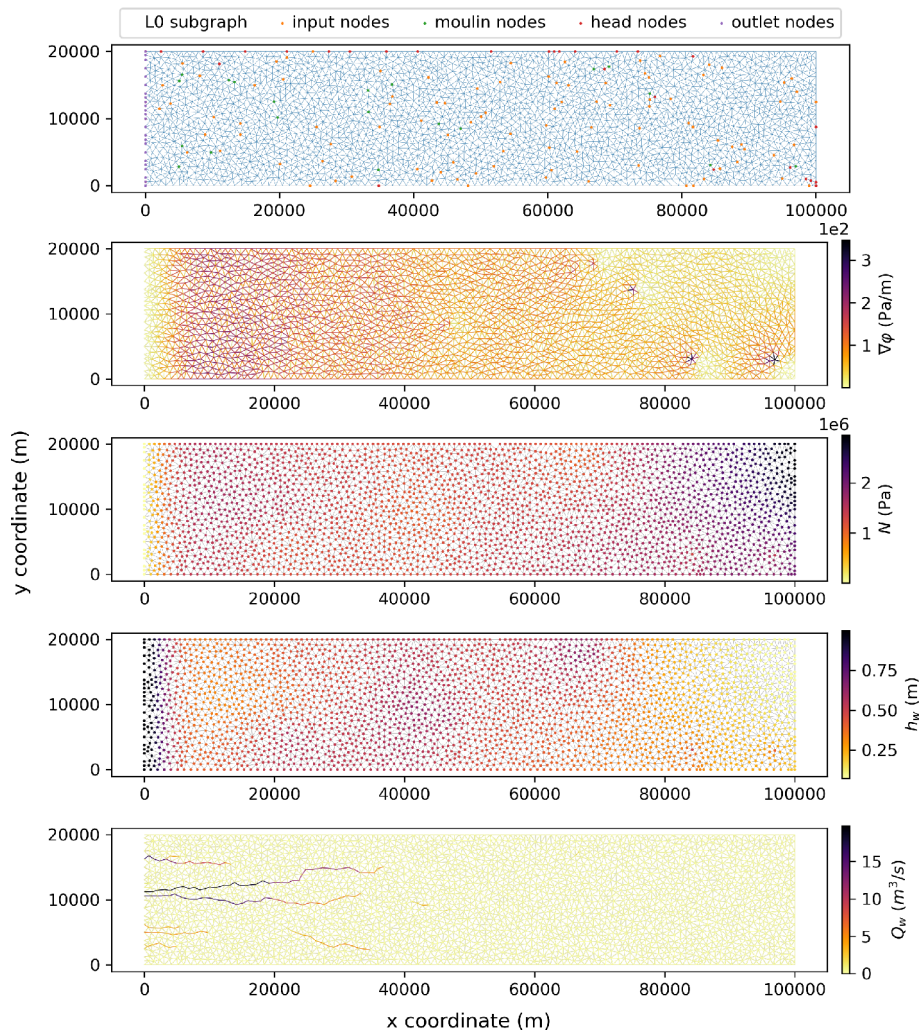

135

**Figure S10.** Graph representation of the model scenario B3 showing a) network geometry, b) the hydraulic potential gradient (Pa/m) on edges c) effective pressure (Pa) on nodes d) thickness of distributed water flow 'sheet' (m) on nodes and e) the channelised water flux on edges ( $\text{m}^3/\text{s}$ )

S1.2.4 B4

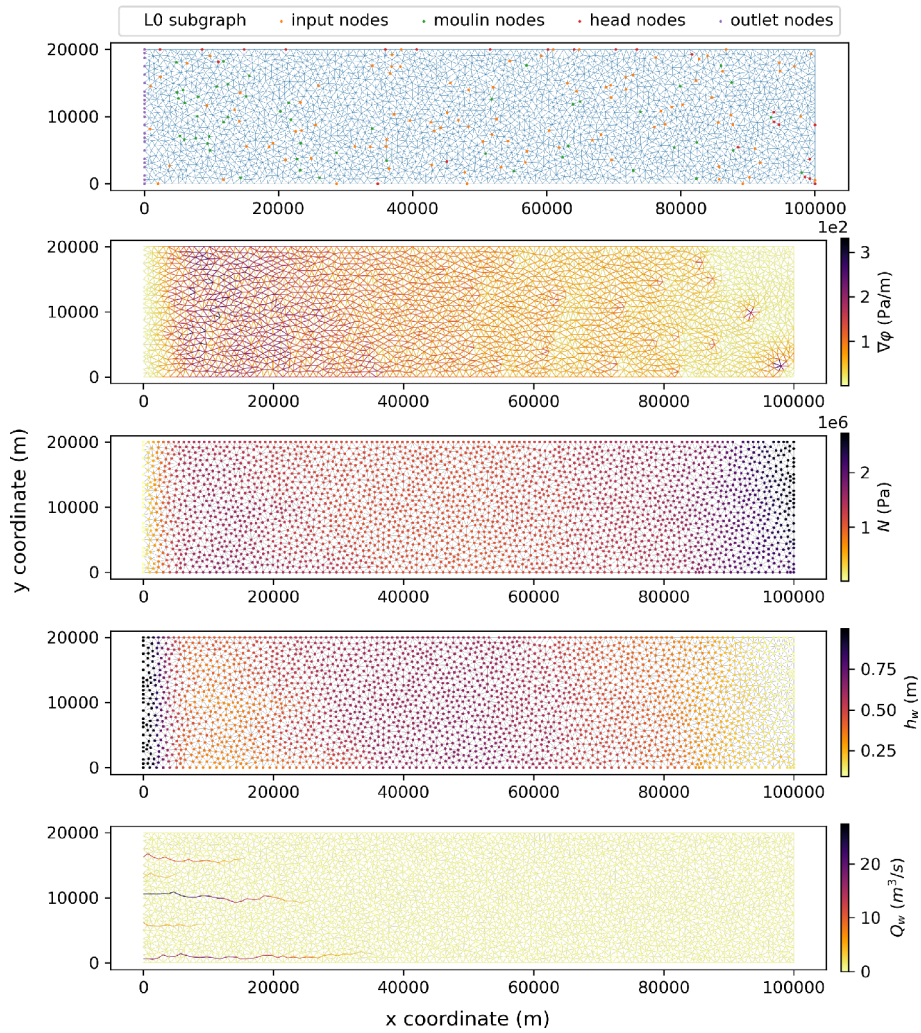

**Figure S11.** Graph representation of the model scenario B4 showing a) network geometry, b) the hydraulic potential gradient (Pa/m) on edges c) effective pressure (Pa) on nodes d) thickness of distributed water flow 'sheet' (m) on nodes and e) the channelised water flux on edges ( $\text{m}^3/\text{s}$ )

S1.2.5 B5

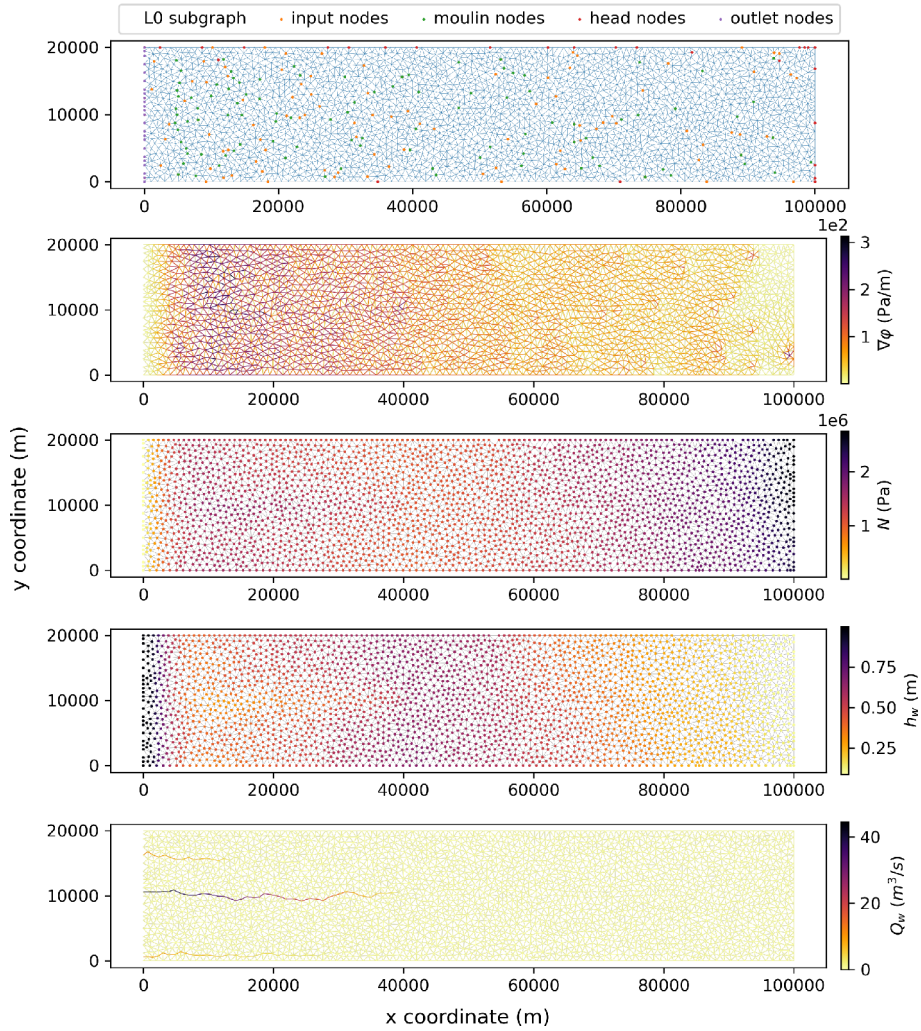

**Figure S12.** Graph representation of the model scenario B5 showing a) network geometry, b) the hydraulic potential gradient (Pa/m) on edges c) effective pressure (Pa) on nodes d) thickness of distributed water flow 'sheet' (m) on nodes and e) the channelised water flux on edges ( $\text{m}^3/\text{s}$ )



140 **S1.2.6 Edge-betweenness Centrality**

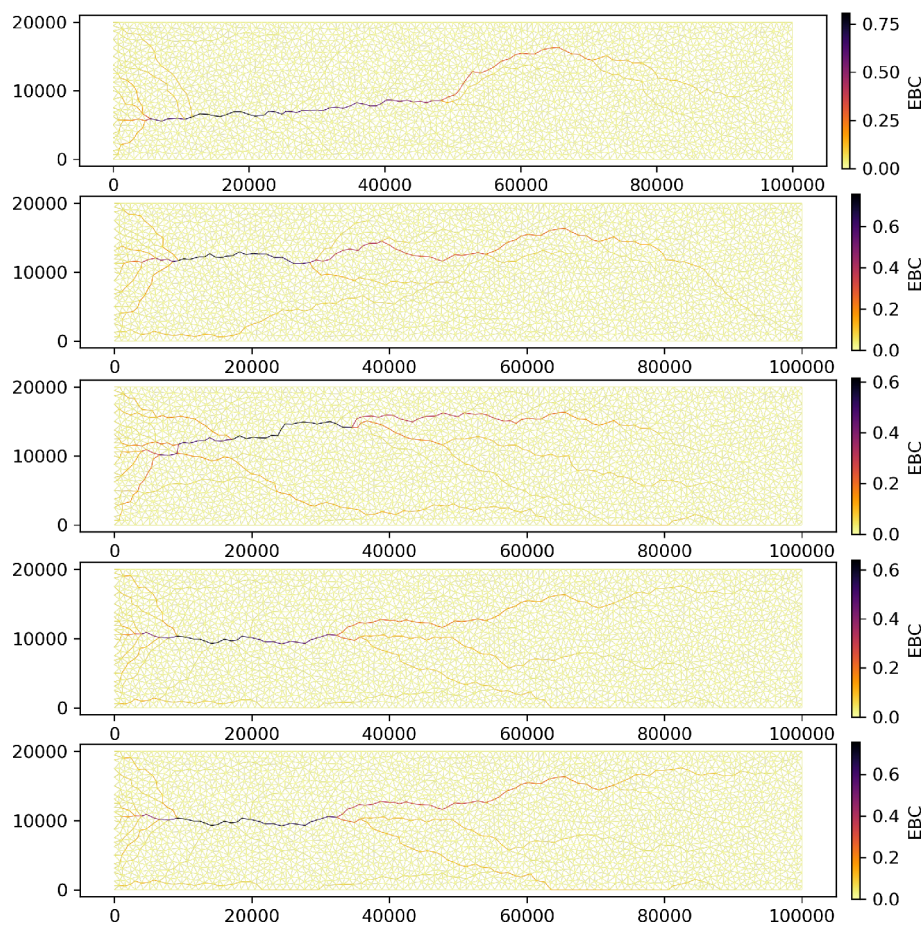

145

**Figure S13.** Edge-betweenness centrality (EBC) with increasing moulins a) B1  $n=1$  b) B2  $n=10$  c) B3  $n=20$  d) B4  $n=50$  and e) B5  $n=100$

### S1.2.7 L1 and L2 networks

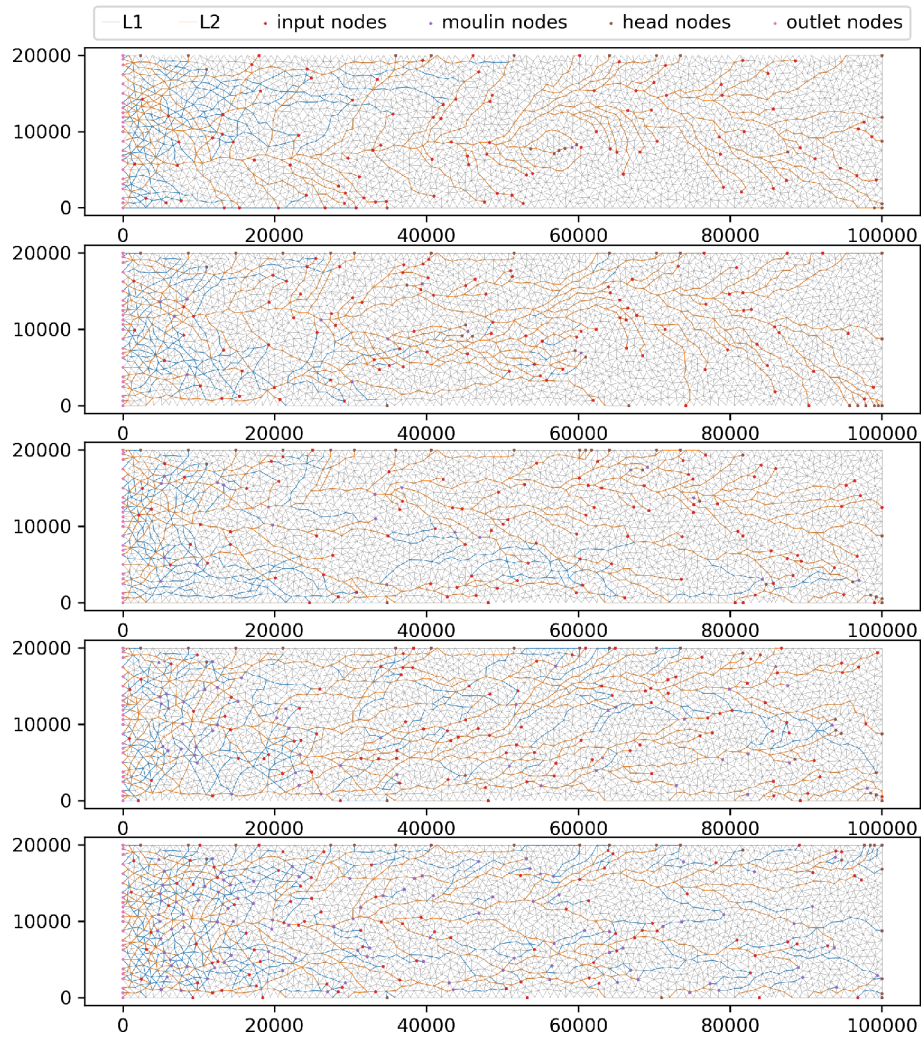

150

**Figure S14.** L1 and L2 networks for increasing moulins a) B1  $n=1$  b) B2  $n=10$  c) B3  $n=20$  d) B4  $n=50$  and e) B5  $n=100$

### S1.3 C-Series models

#### S1.3.1 C series beginning and C0

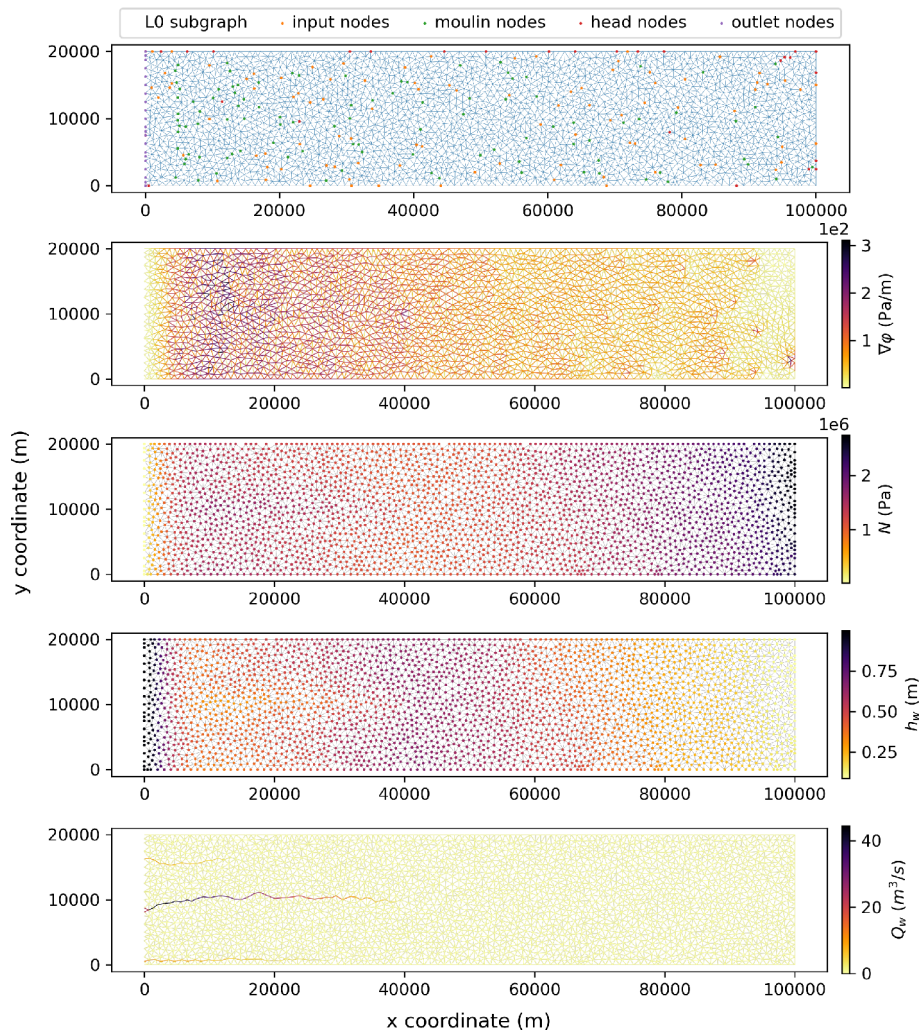

**Figure S15.** Graph representation of the model scenario C1 at timestep 0 showing a) network geometry, b) the hydraulic potential gradient (Pa/m) on edges c) effective pressure (Pa) on nodes d) thickness of distributed water flow 'sheet' (m) on nodes and e) the channelised water flux on edges ( $m^3/s$ ). C0 has this configuration throughout

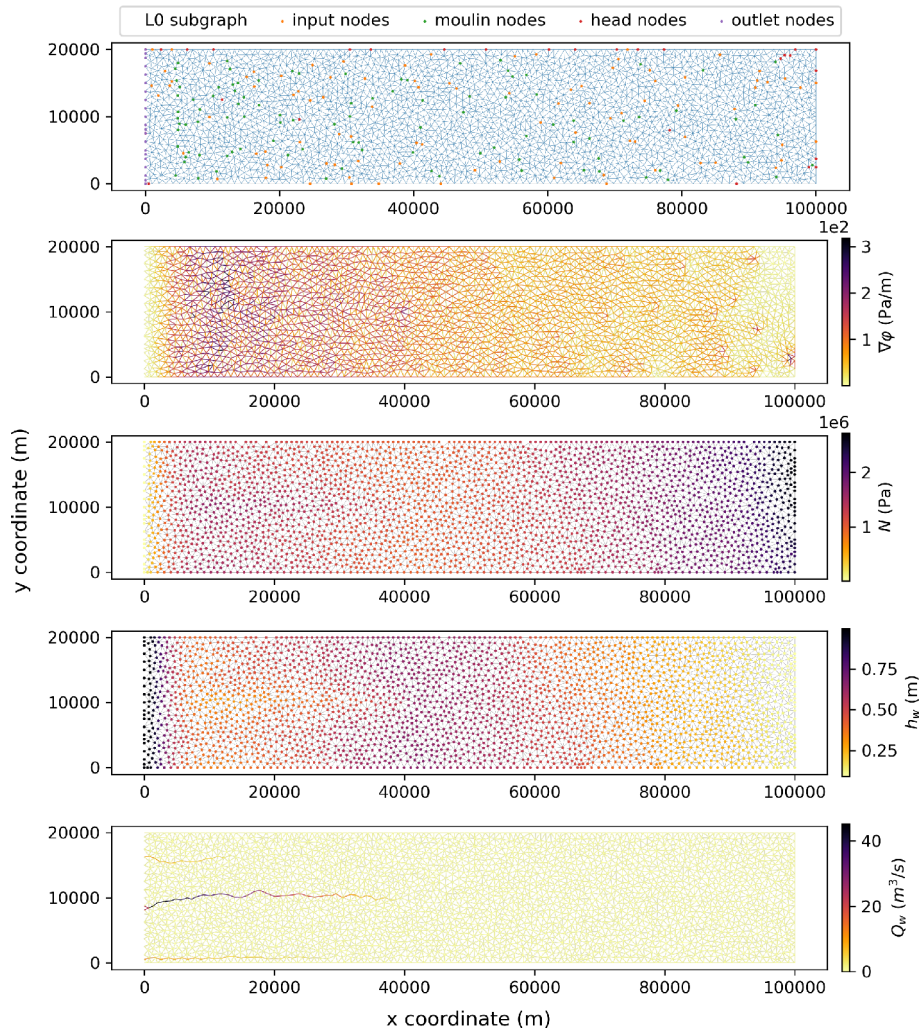

**Figure S16.** Graph representation of the model scenario C1 at the end of day 49 showing a) network geometry, b) the hydraulic potential gradient (Pa/m) on edges c) effective pressure (Pa) on nodes d) thickness of distributed water flow 'sheet' (m) on nodes and e) the channelised water flux on edges ( $\text{m}^3/\text{s}$ )

### S1.3.3 C2 end

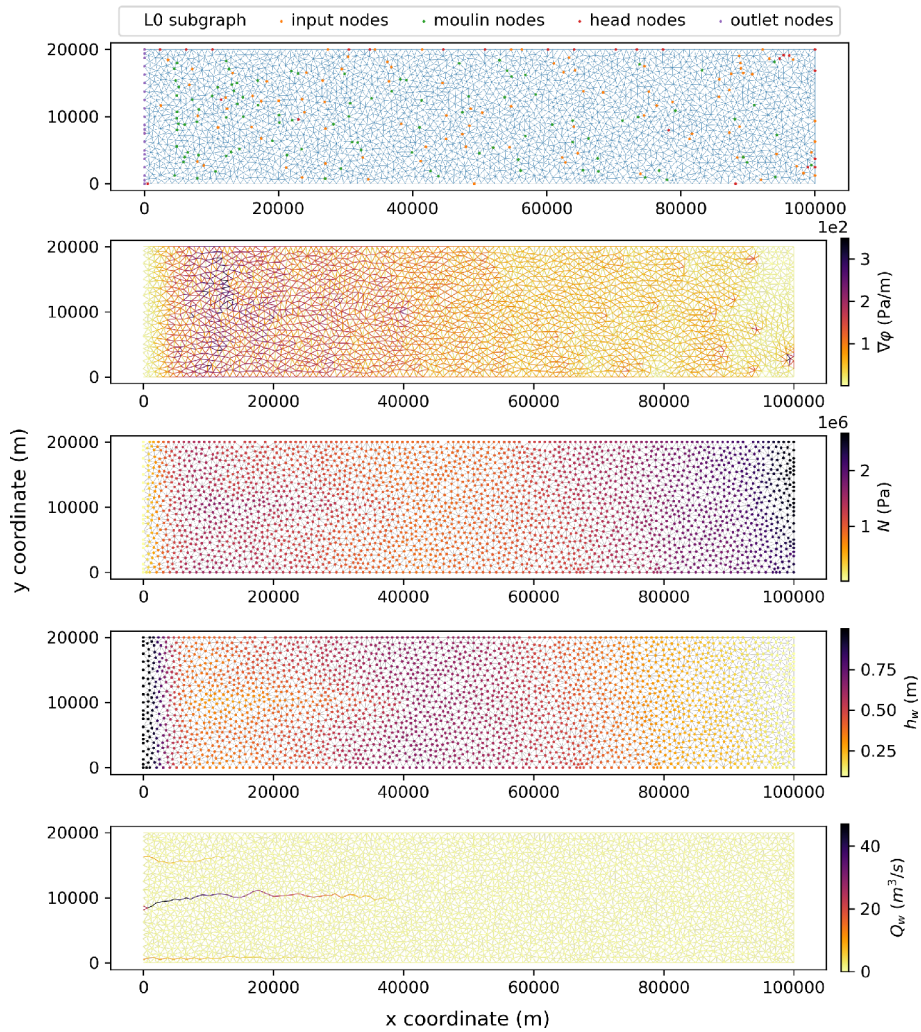

**Figure S17.** Graph representation of the model scenario C2 at the end of day 49 showing a) network geometry, b) the hydraulic potential gradient (Pa/m) on edges c) effective pressure (Pa) on nodes d) thickness of distributed water flow 'sheet' (m) on nodes and e) the channelised water flux on edges ( $\text{m}^3/\text{s}$ )

### S1.3.4 C3 end

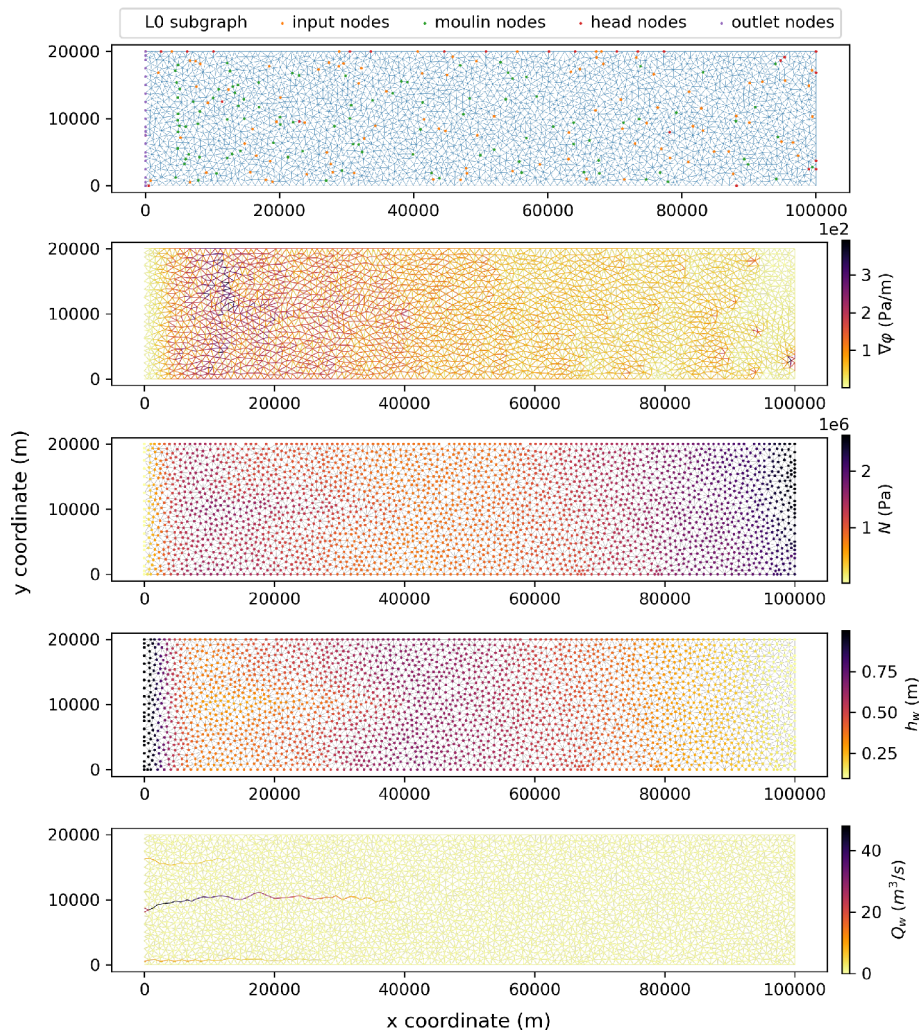

160

**Figure S18.** Graph representation of the model scenario C3 at the end of day 49 showing a) network geometry, b) the hydraulic potential gradient (Pa/m) on edges c) effective pressure (Pa) on nodes d) thickness of distributed water flow 'sheet' (m) on nodes and e) the channelised water flux on edges ( $\text{m}^3/\text{s}$ )

### S1.3.5 C4 end

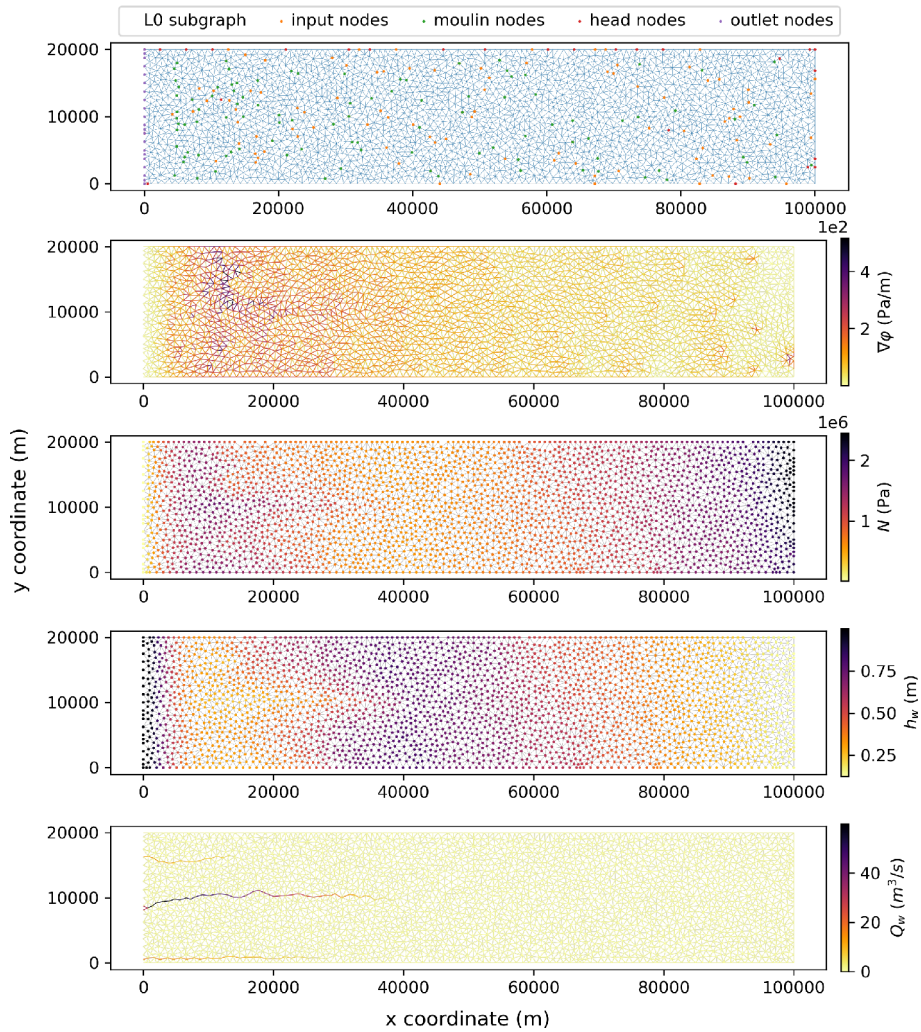

**Figure S19.** Graph representation of model scenario C4 at the end of day 49 showing a) network geometry, b) the hydraulic potential gradient (Pa/m) on edges c) effective pressure (Pa) on nodes d) thickness of distributed water flow 'sheet' (m) on nodes and e) the channelised water flux on edges ( $\text{m}^3/\text{s}$ )

### S1.3.6 Edge-betweenness Centrality

165

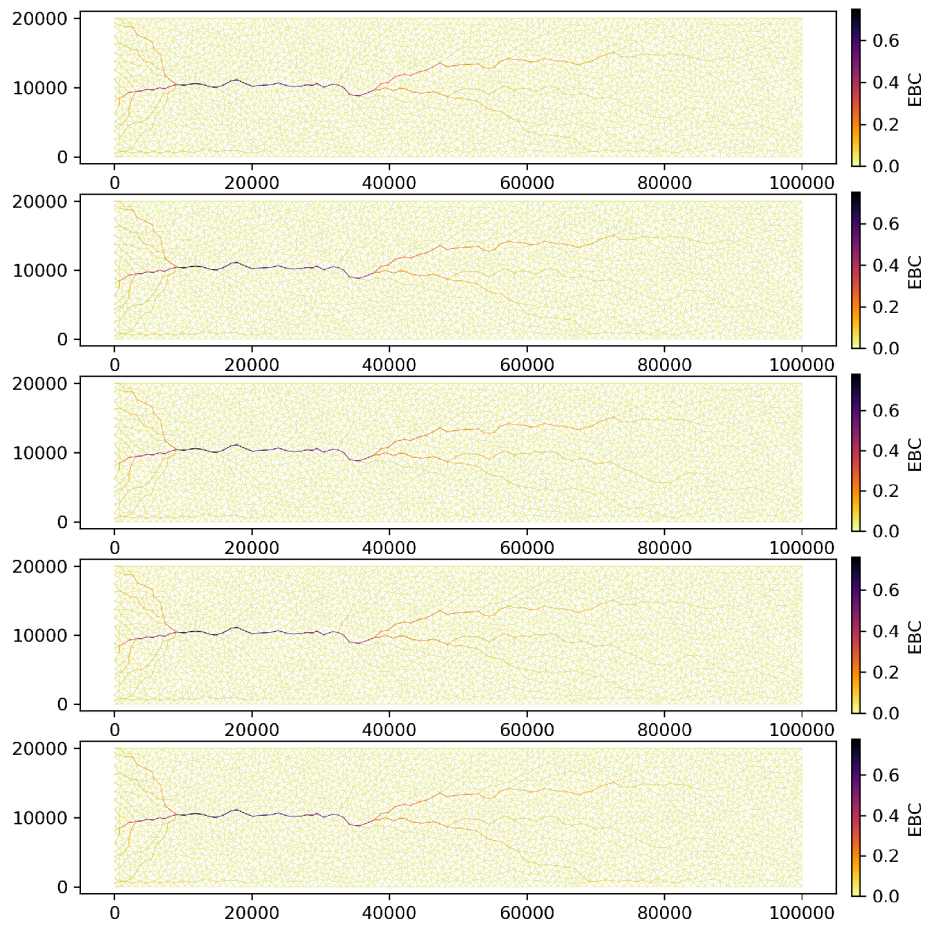

**Figure S20.** Edge-betweenness centrality (EBC) for a) C1 at timestep 0 b) C1 at timestep 1200 c) C2 at timestep 1200 d) C3 at timestep 1200 e) C4 at timestep 1200



### S1.3.7 L1 and L2 networks

170

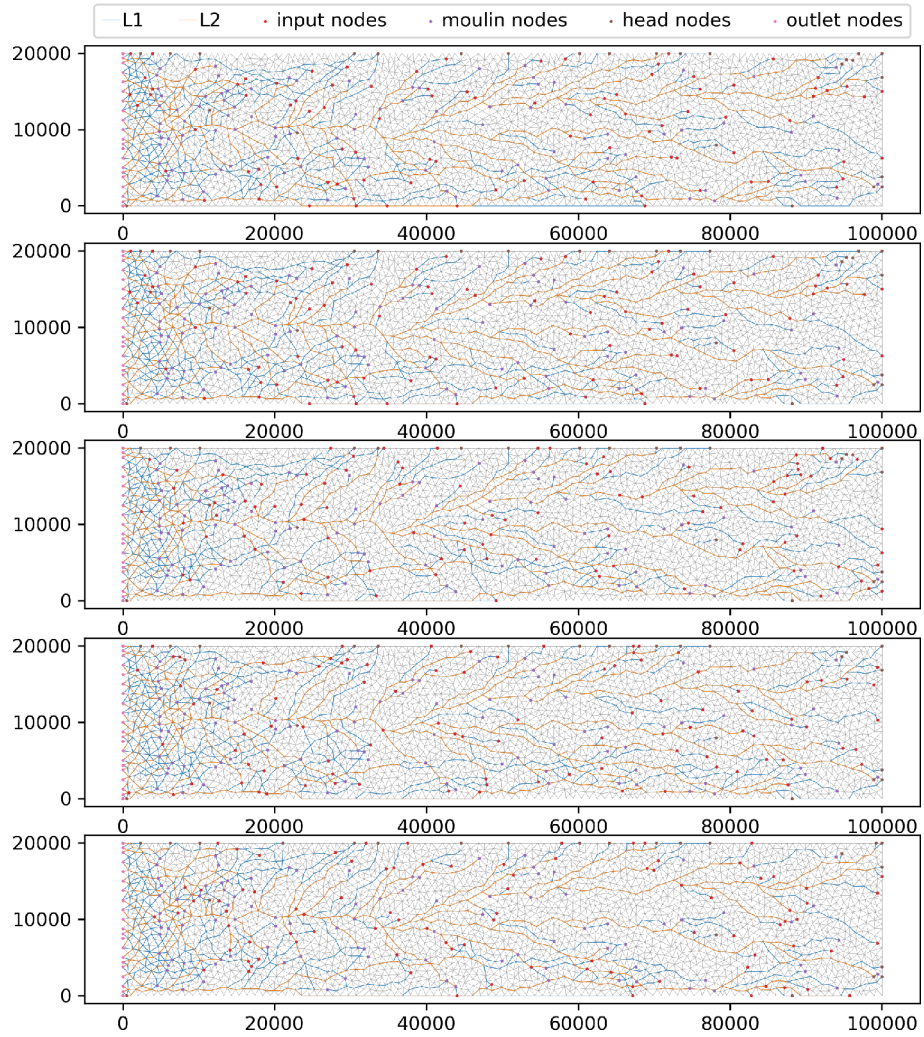

**Figure S21.** L1 and L2 networks for a) C1 at timestep 0 b) C1 at timestep 1200 c) C2 at timestep 1200 d) C3 at timestep 1200 e) C4 at timestep 1200

## S2.1 Experiment Set 1

## S2.1.1 A4 reference

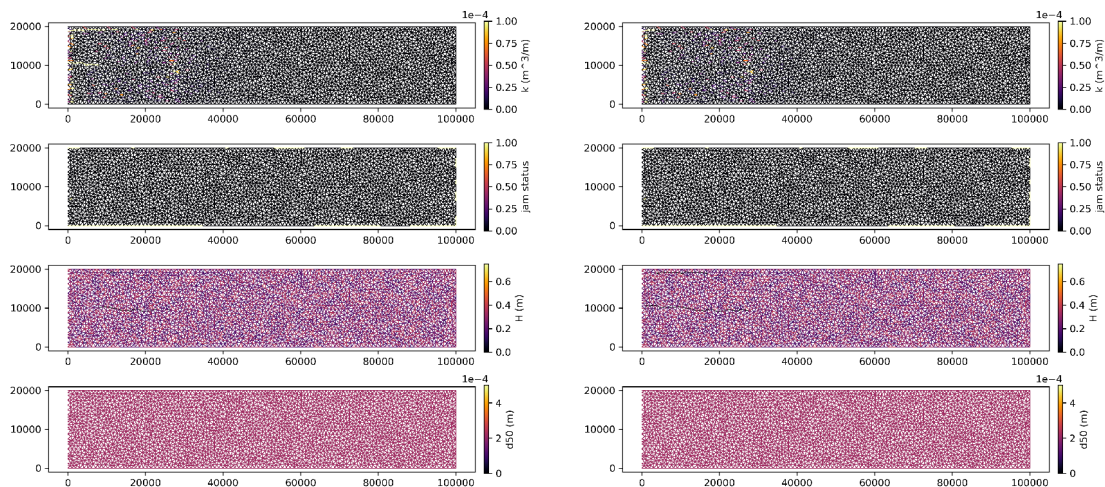

Figure S22. Results for the A4 reference model run at a) week 0 and b) week 25

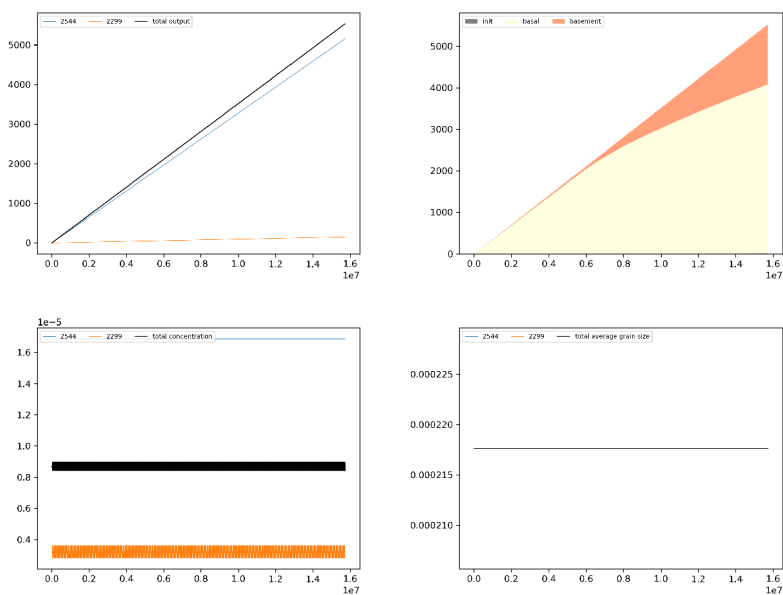

Figure S23. Outputs from the A4 reference model run with a) volume flux b) detritus volume flux c) concentration d) grain size. In a, c and d numbers indicate outlet node IDs

## S2.1.2 A4 default

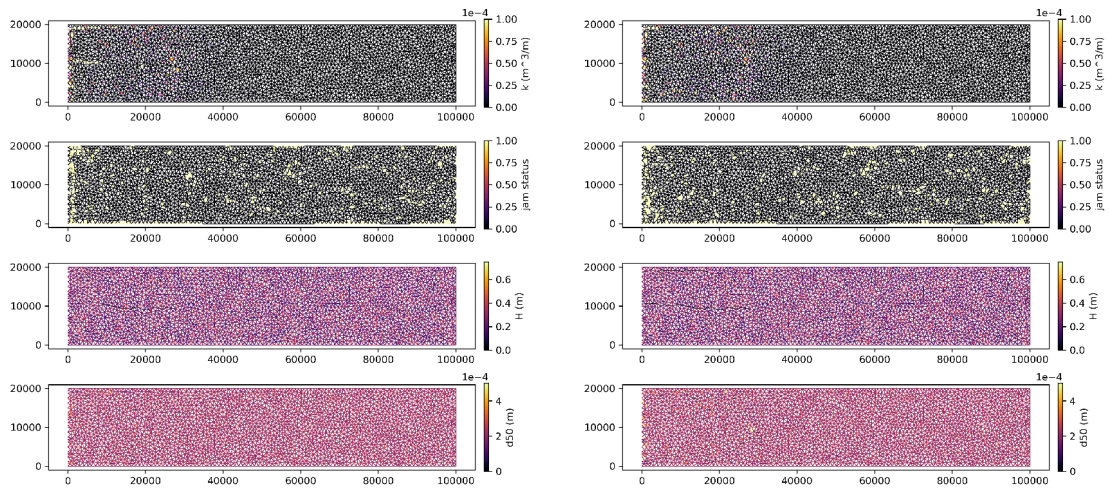

**Figure S24.** Results for the A4 default model run at a) week 0 and b) week 25

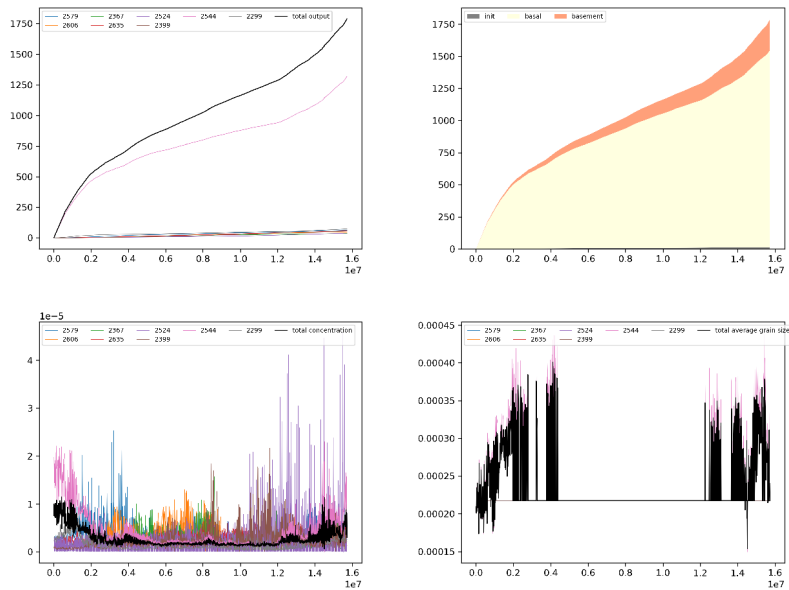

**Figure S25.** Outputs from the A4 default model run with a) volume flux b) detritus volume flux c) concentration d) grainsize. In a, c and d numbers indicate outlet node IDs

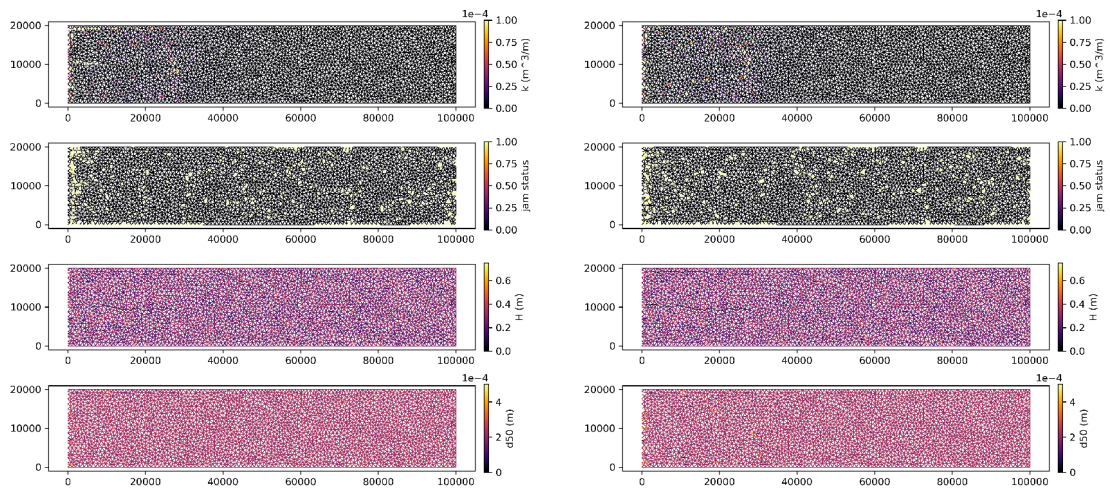

Figure S26. Results for the A4 default model rerun at a) week 0 and b) week 25

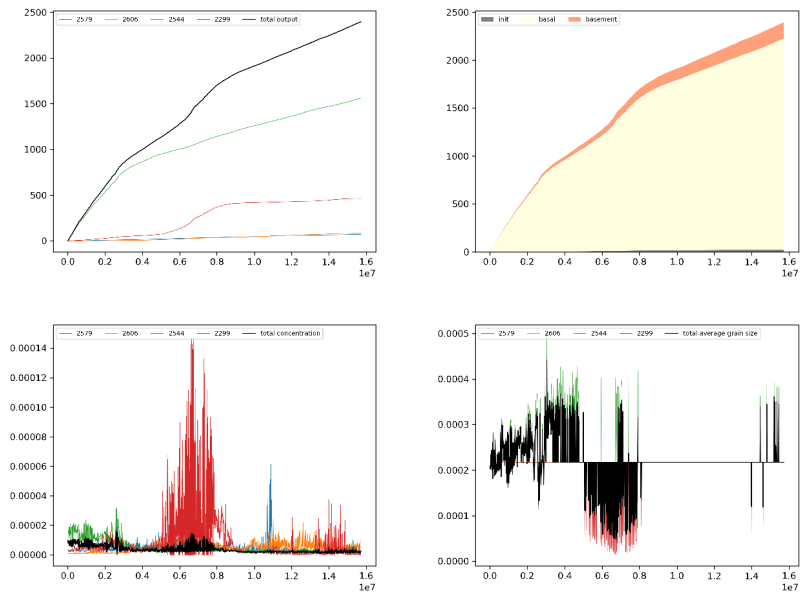

Figure S27. Outputs from the A4 default model rerun with a) volume flux b) detritus volume flux c) concentration d) grainsize. In a, c and d numbers indicate outlet node IDs

## S2.1.4 A4D default

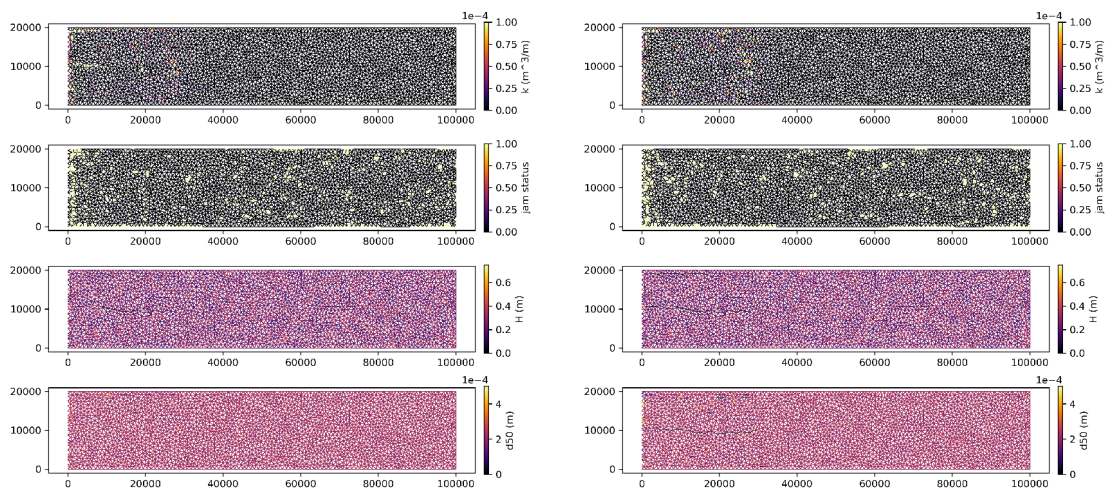

190

**Figure S28.** Results for the A4D default model run at a) week 0 and b) week 25

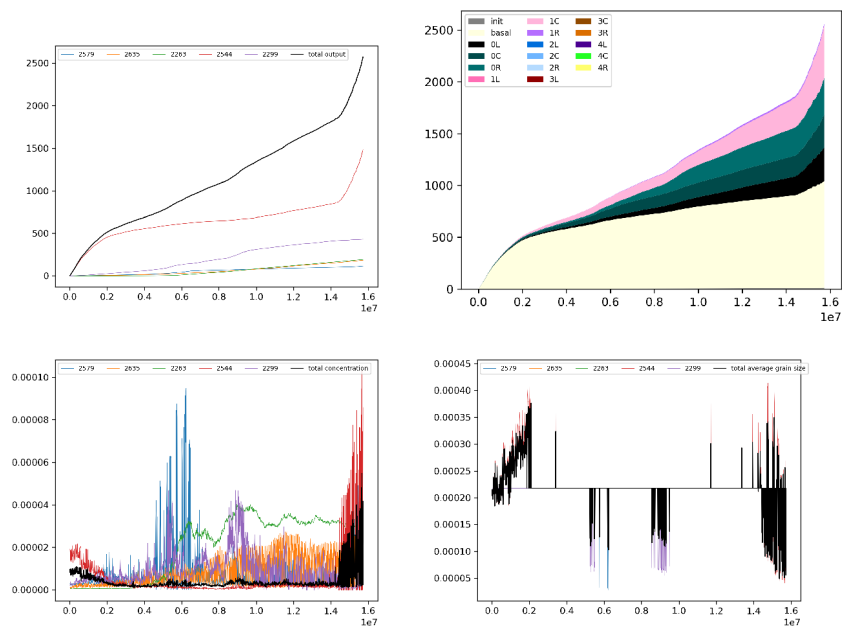

**Figure S29.** Outputs from the A4D default model run with a) volume flux b) detritus volume flux c) concentration d) grainsize. In a, c and d numbers indicate outlet node IDs

## S2.1.5 A4D default rerun

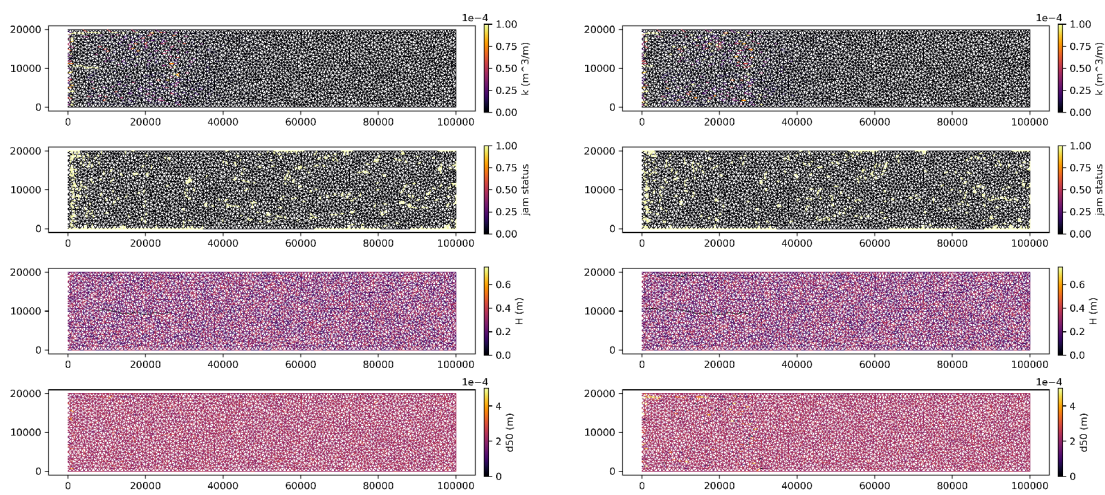

Figure S30. Results for the A4D default model rerun at a) week 0 and b) week 25

195

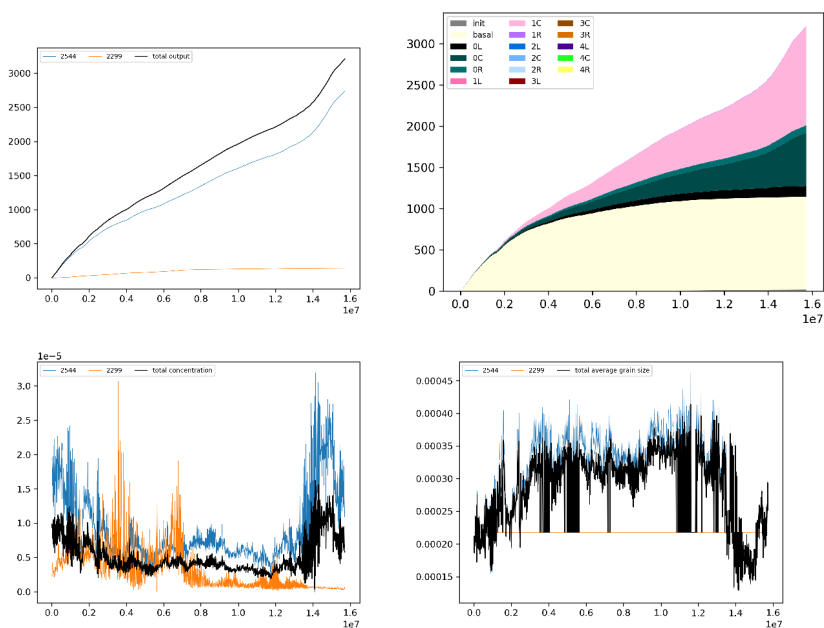

Figure S31. Outputs from the A4D default model rerun with a) volume flux b) detritus volume flux c) concentration d) grainsize. In a, c and d numbers indicate outlet node IDs

## S2.1.6 A5 reference

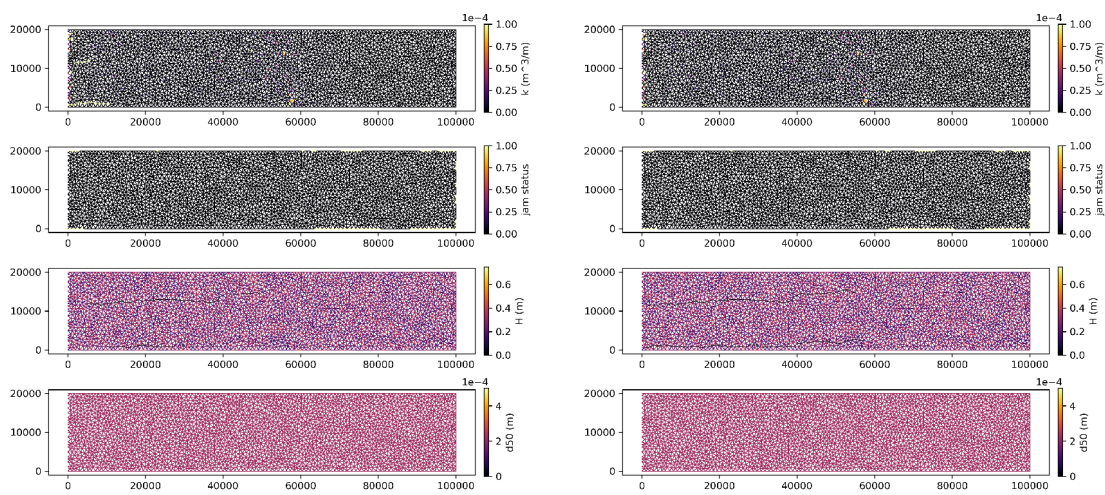

**Figure S32.** Results for the A5 reference model run at a) week 0 and b) week 25

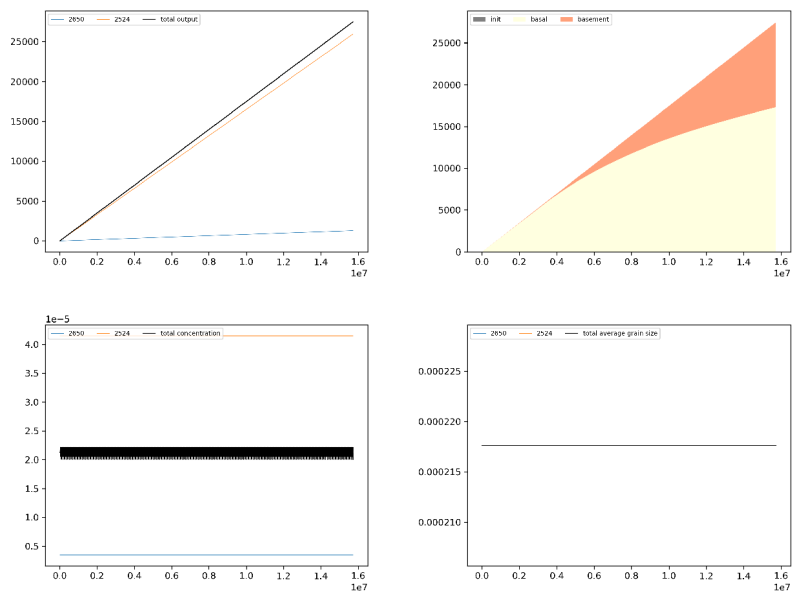

**Figure S33.** Outputs from the A5 reference model run with a) volume flux b) detritus volume flux c) concentration d) grainsize. In a, c and d numbers indicate outlet node IDs

## S2.1.7 A5 default

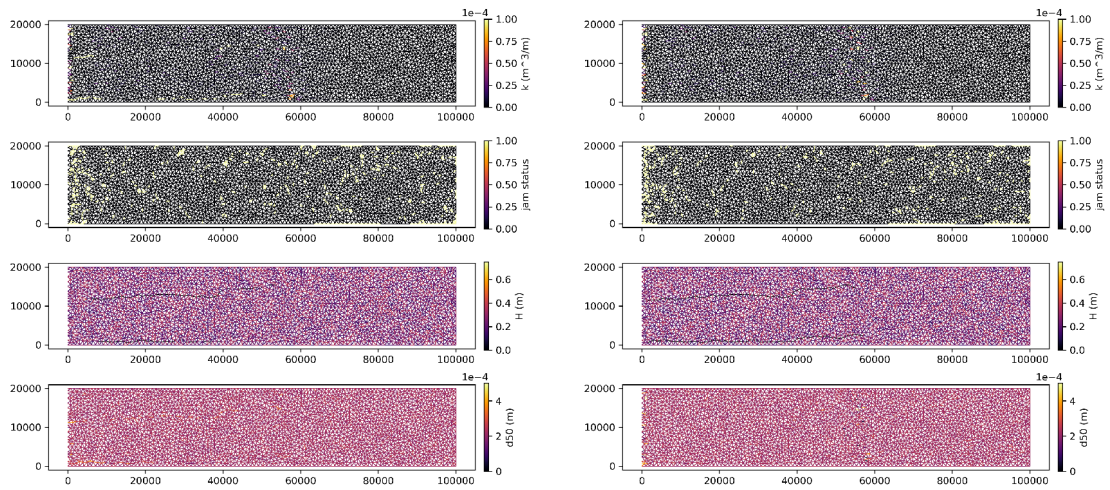

**Figure S34.** Results for the A5 default model run at a) week 0 and b) week 25

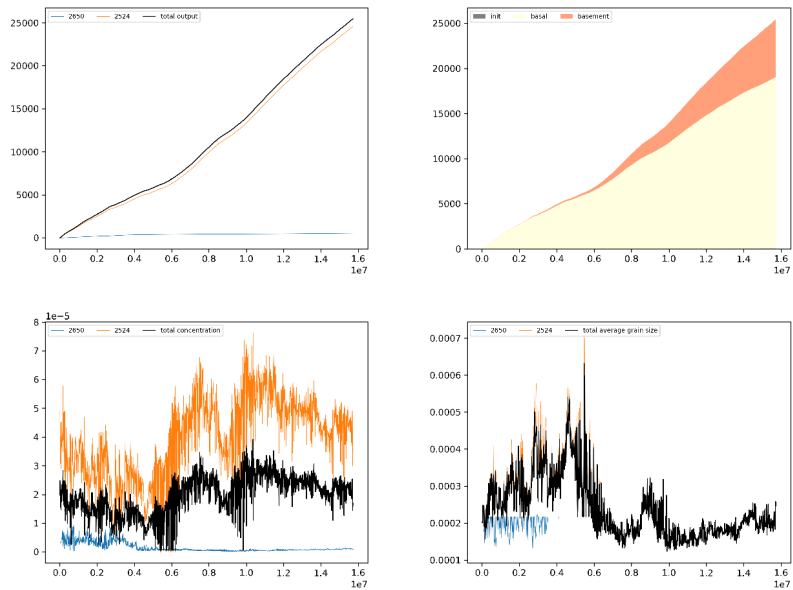

**Figure S35.** Outputs from the A5 default model run with a) volume flux b) detritus volume flux c) concentration d) grainsize. In a, c and d numbers indicate outlet node IDs



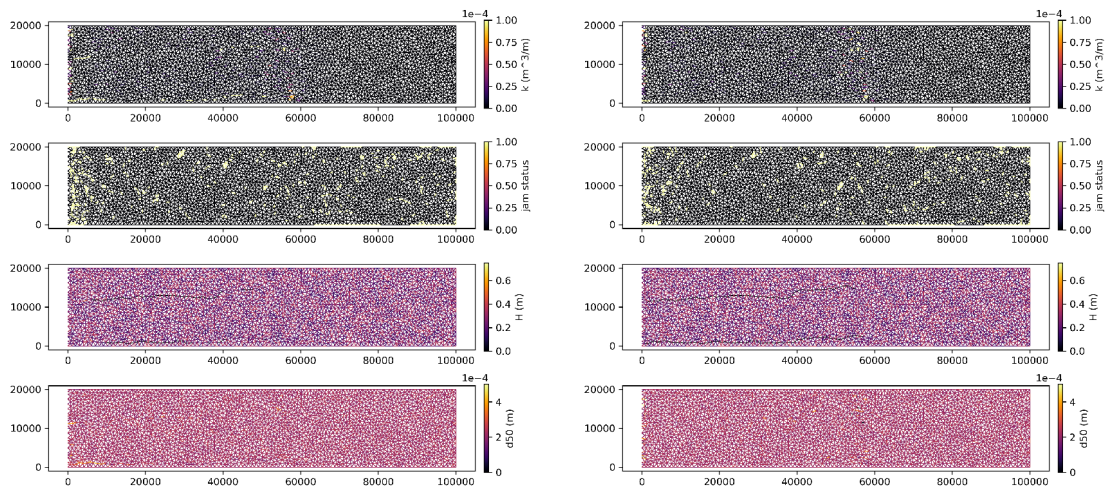

Figure S36. Results for the A5 default model rerun at a) week 0 and b) week 25

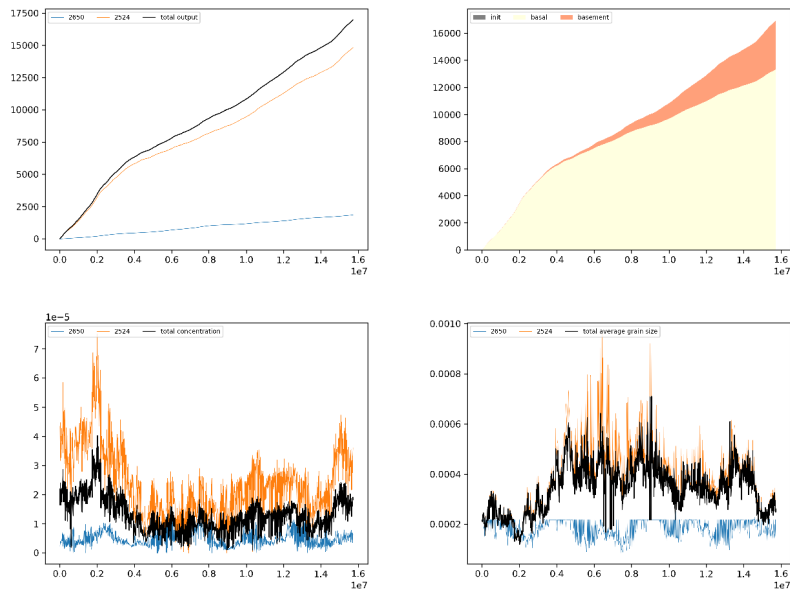

Figure S37. Outputs from the A5 default model rerun with a) volume flux b) detritus volume flux c) concentration d) grainsize. In a, c and d numbers indicate outlet node IDs

## S2.1.9 A5D default

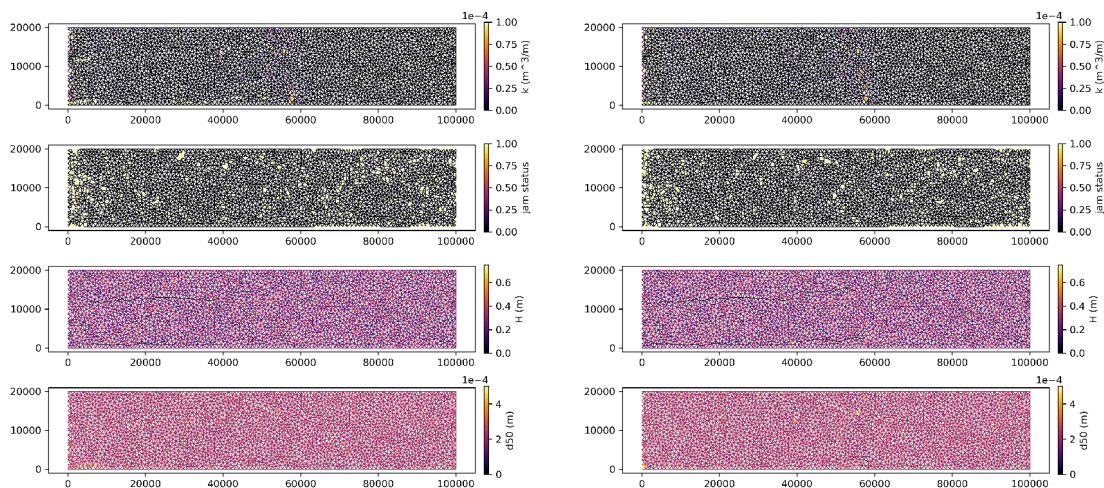

210

**Figure S38.** Results for the A5D default model run at a) week 0 and b) week 25

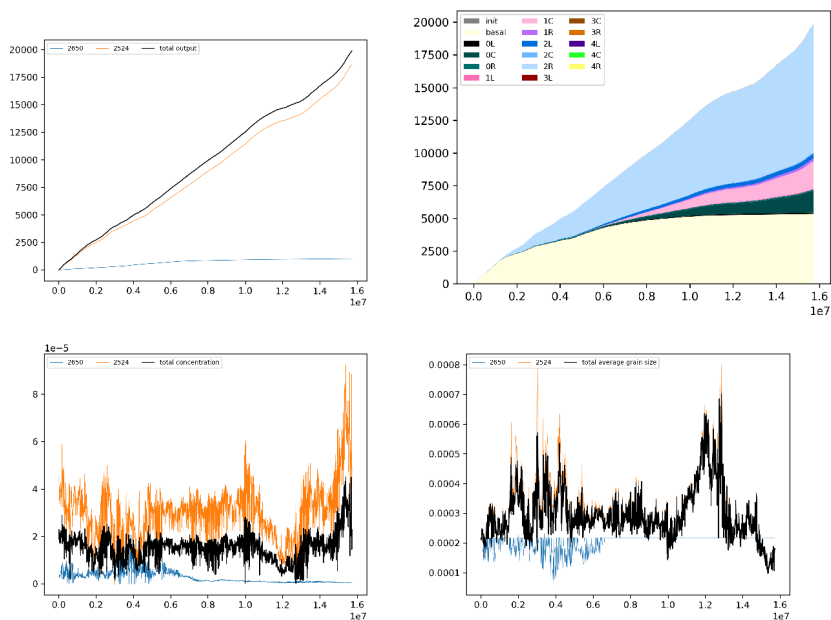

**Figure S39.** Outputs from the A5D default model run with a) volume flux b) detritus volume flux c) concentration d) grainsize. In a, c and d numbers indicate outlet node IDs

## S2.1.10 A5D default rerun

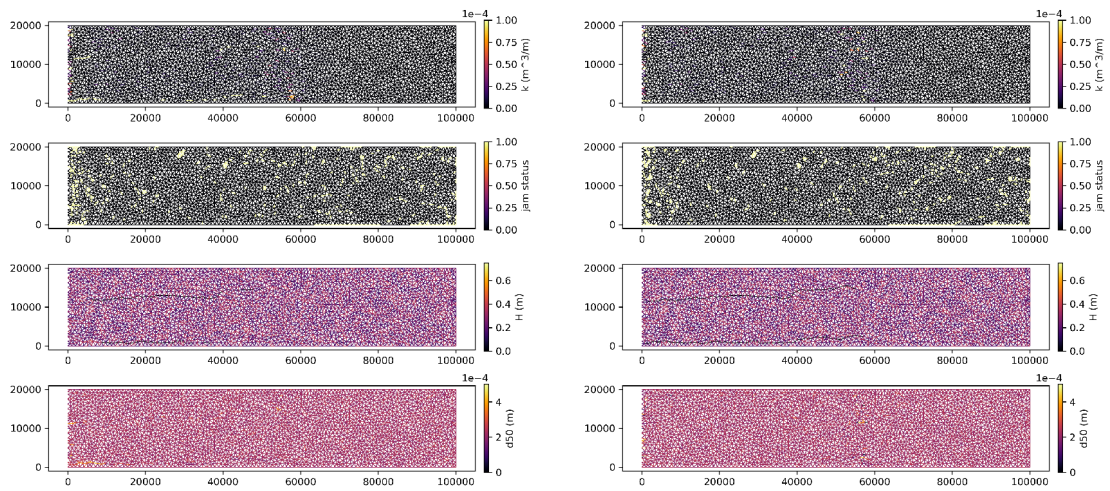

**Figure S40.** Results for the A5D default model rerun at a) week 0 and b) week 25

215

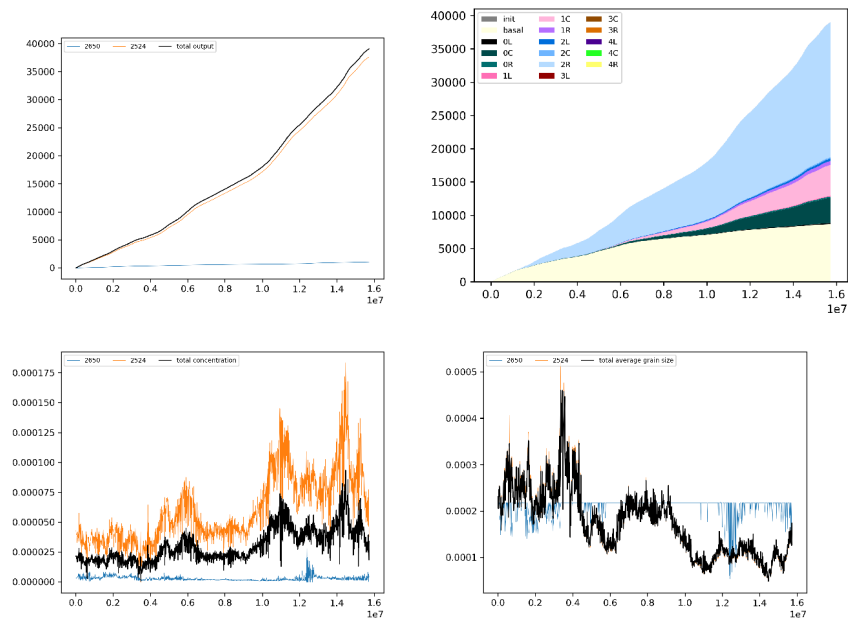

**Figure S41.** Outputs from the A5D default model rerun with a) volume flux b) detritus volume flux c) concentration d) grainsize. In a, c and d numbers indicate outlet node IDs

## S2.1.11 A7 reference

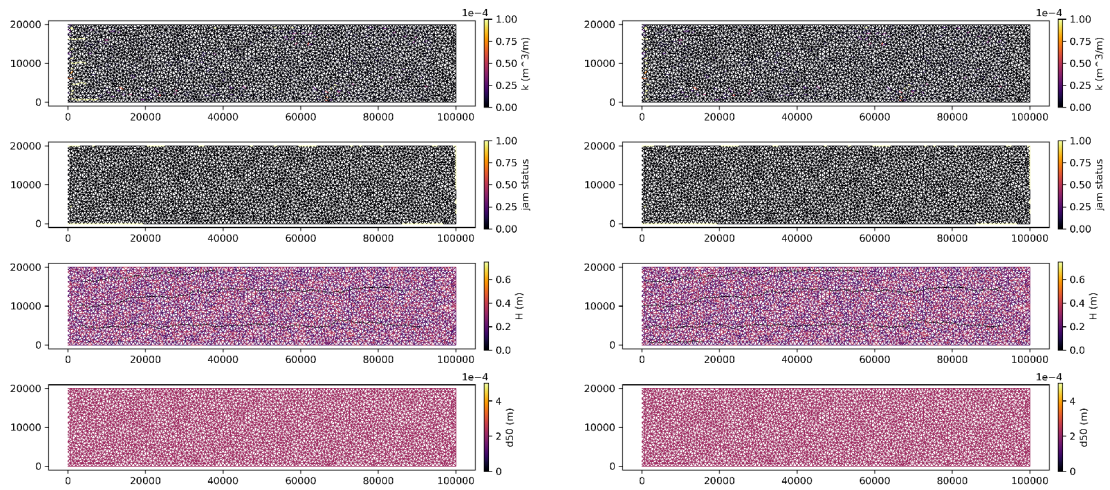

**Figure S42.** Results for the A7 reference model run at a) week 0 and b) week 25

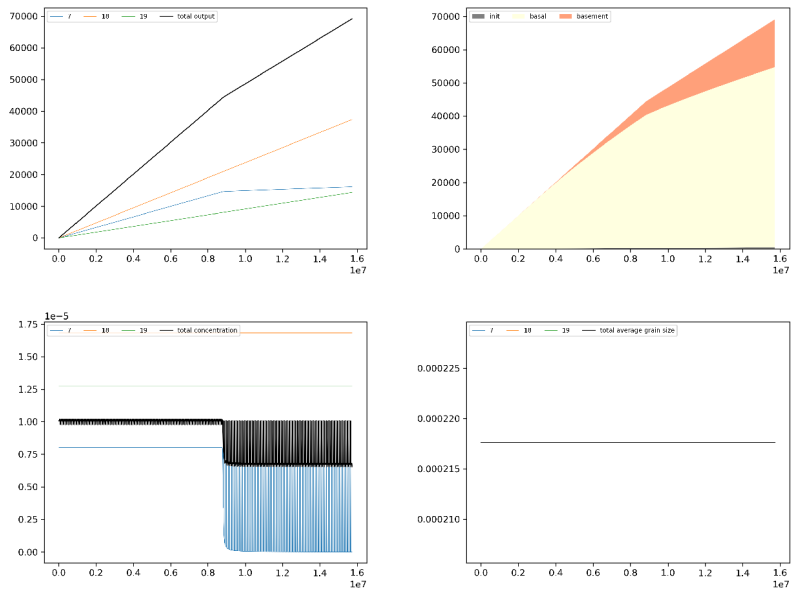

220

**Figure S43.** Outputs from the A7 reference model run with a) volume flux b) detritus volume flux c) concentration d) grainsize. In a, c and d numbers indicate outlet node IDs

## S2.1.12 A7 default

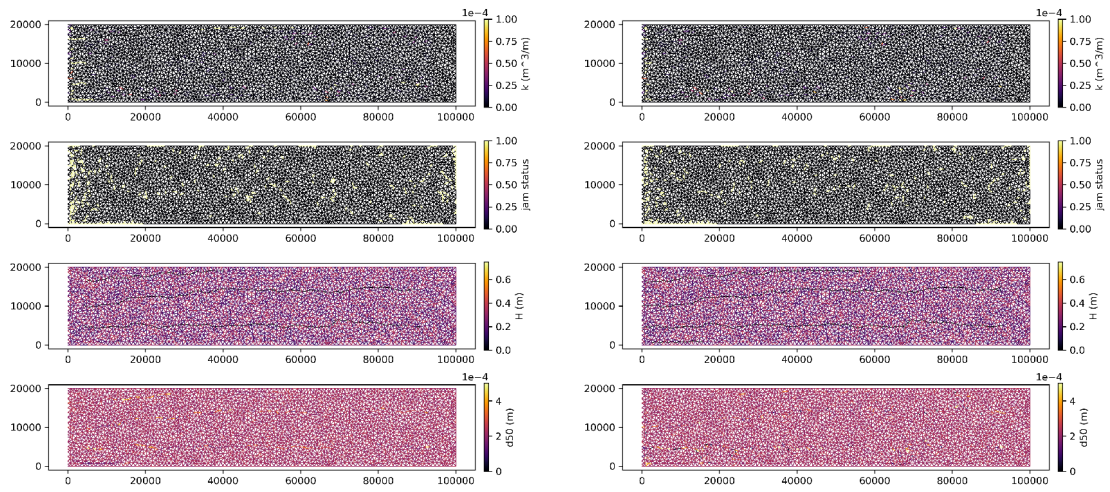

**Figure S44.** Results for the A7 default model run at a) week 0 and b) week 25

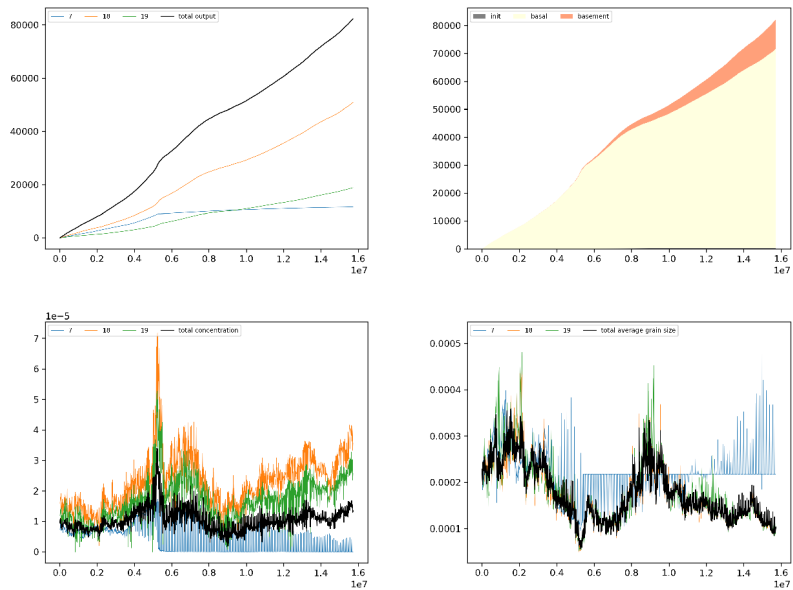

**Figure S45.** Outputs from the A7 default model run with a) volume flux b) detritus volume flux c) concentration d) grainsize. In a, c and d numbers indicate outlet node IDs

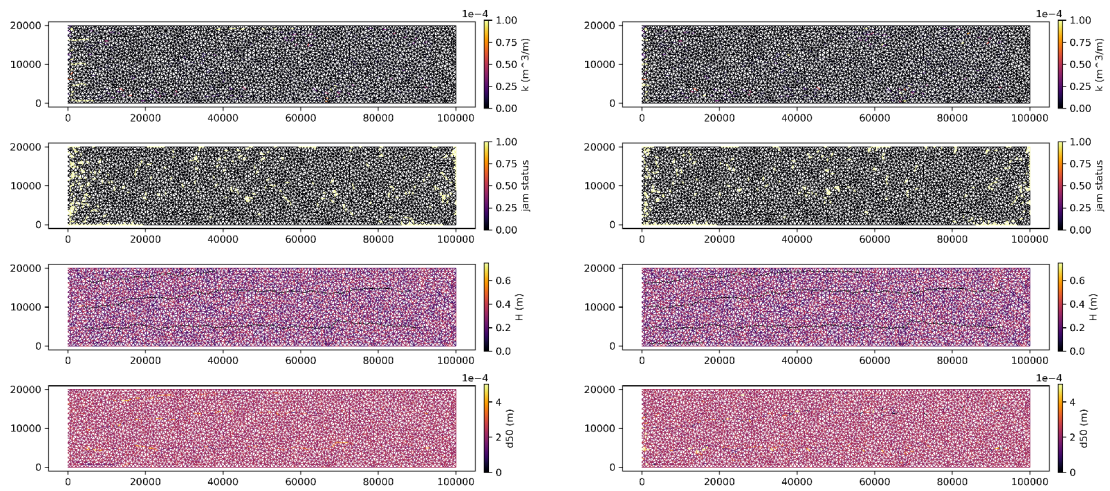

Figure S46. Results for the A7 default model rerun at a) week 0 and b) week 25

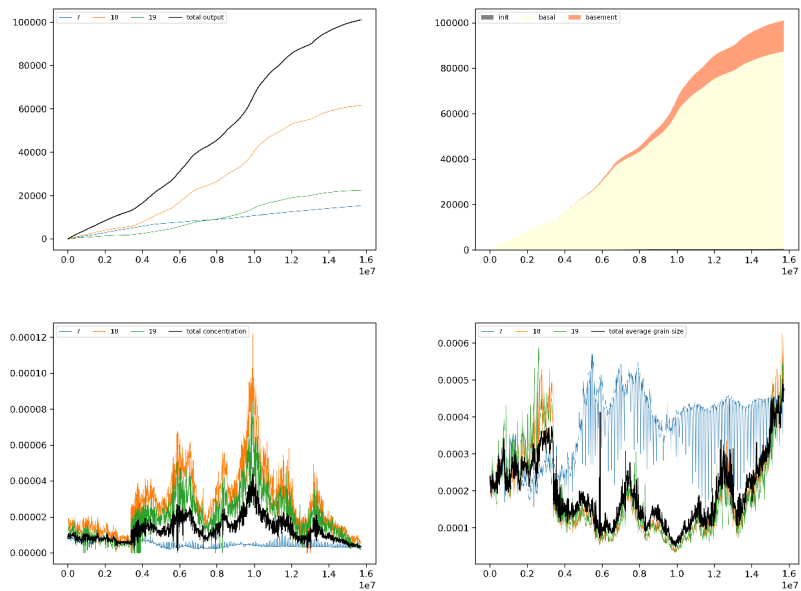

Figure S47. Outputs from the A7 default model rerun with a) volume flux b) detritus volume flux c) concentration d) grainsize. In a, c and d numbers indicate outlet node IDs

## S2.1.14 A7D default

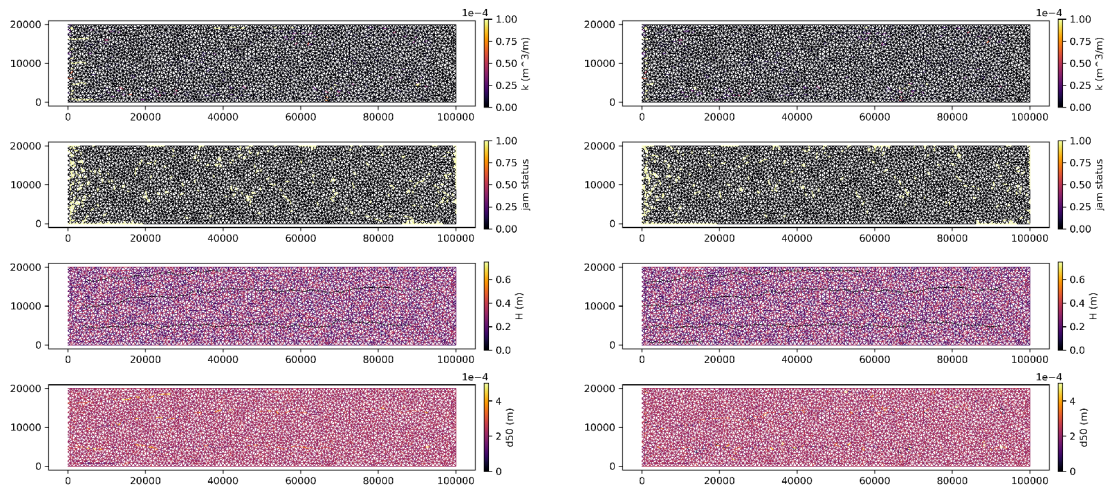

230

**Figure S48.** Results for the A7D default model run at a) week 0 and b) week 25

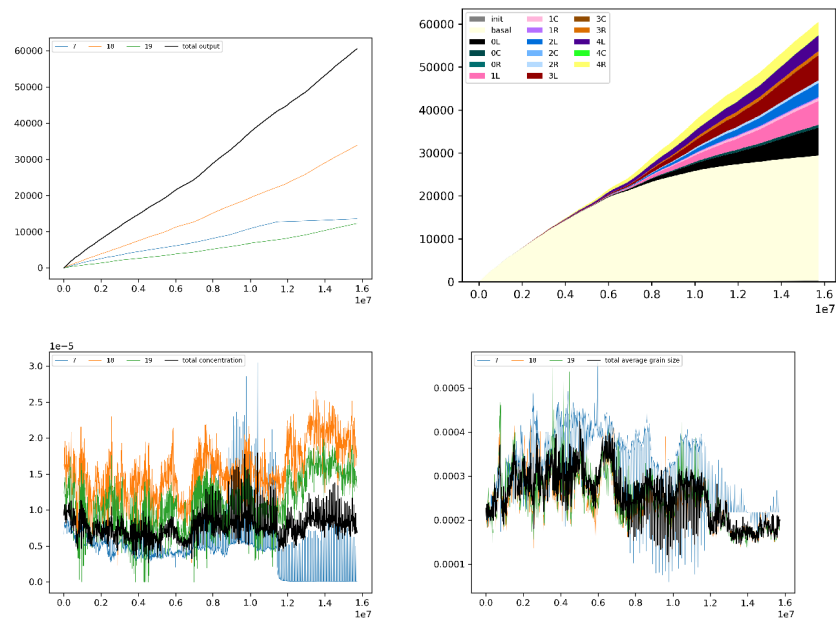

**Figure S49.** Outputs from the A7D default model run with a) volume flux b) detritus volume flux c) concentration d) grainsize. In a, c and d numbers indicate outlet node IDs

## S2.1.15 A7D default rerun

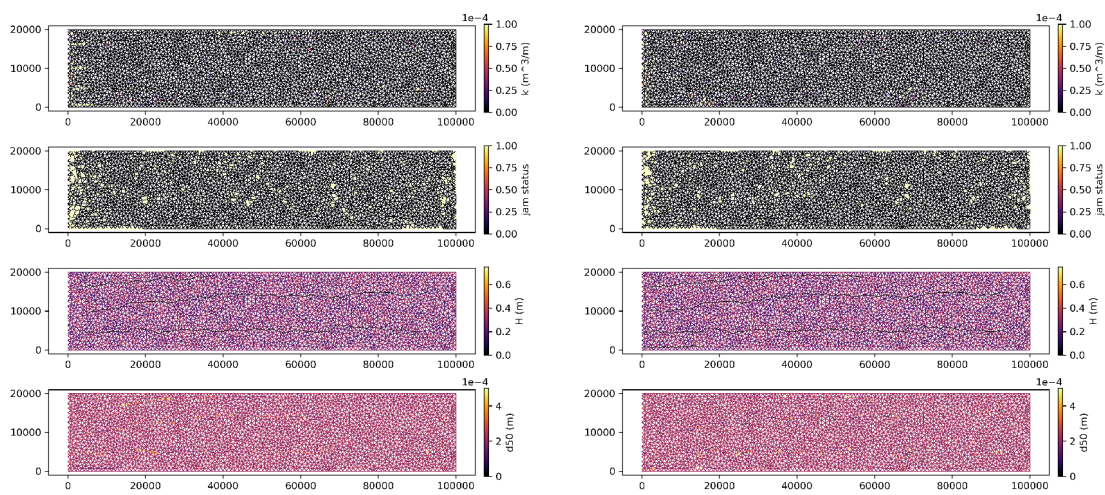

**Figure S50.** Results for the A7D default model rerun at a) week 0 and b) week 25

235

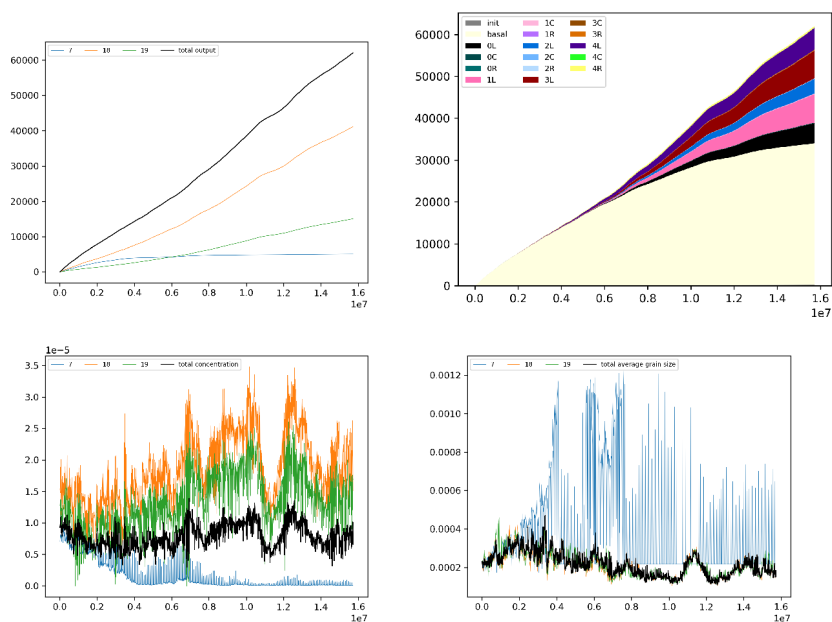

**Figure S51.** Outputs from the A7D default model rerun with a) volume flux b) detritus volume flux c) concentration d) grainsize. In a, c and d numbers indicate outlet node IDs



## S2.1.16 A8 reference

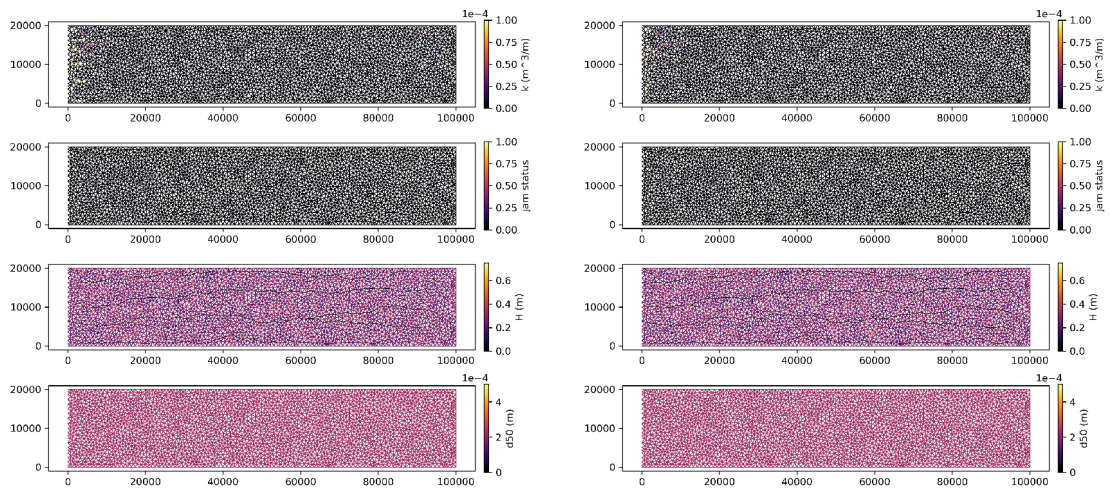

Figure S52. Results for the A8 reference model run at a) week 0 and b) week 25

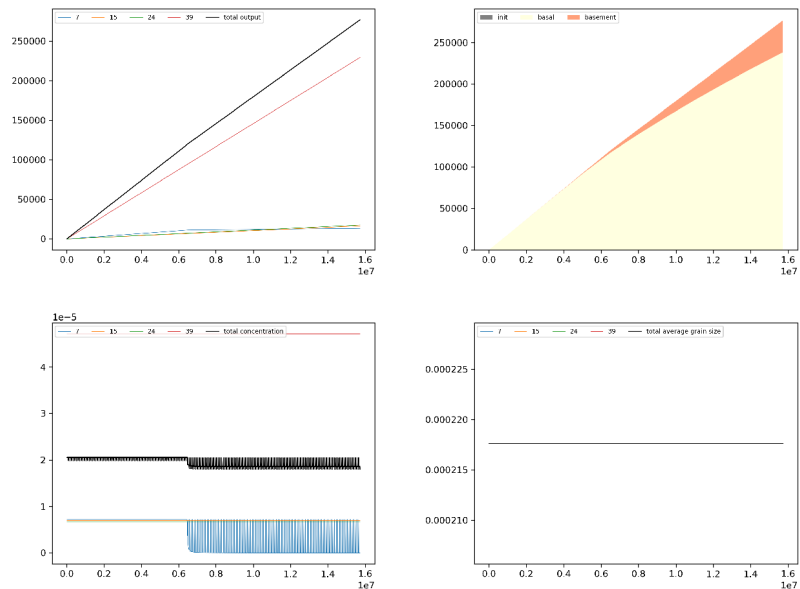

240

Figure S53. Outputs from the A8 reference model run with a) volume flux b) detritus volume flux c) concentration d) grainsize. In a, c and d numbers indicate outlet node IDs

## S2.1.17 A8 default

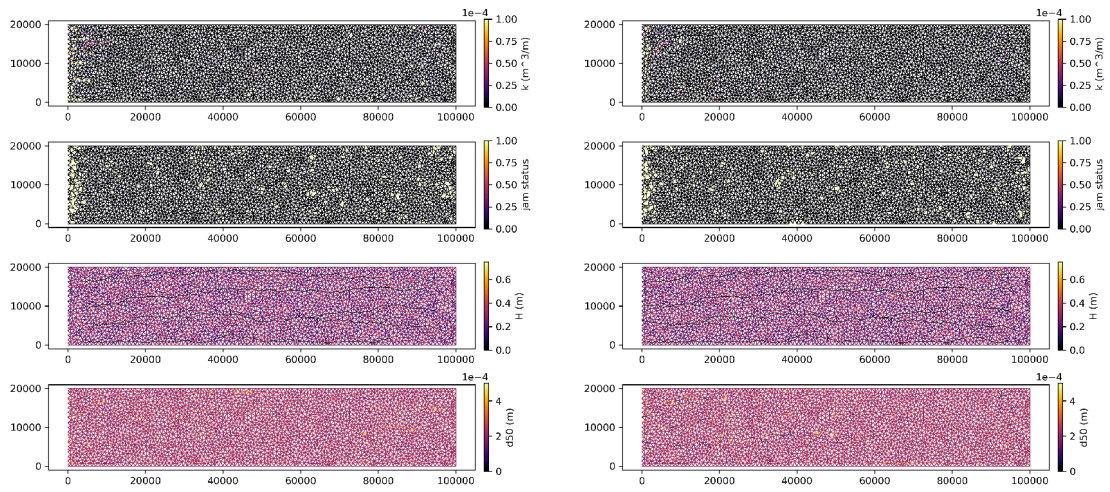

**Figure S54.** Results for the A8 default model run at a) week 0 and b) week 25

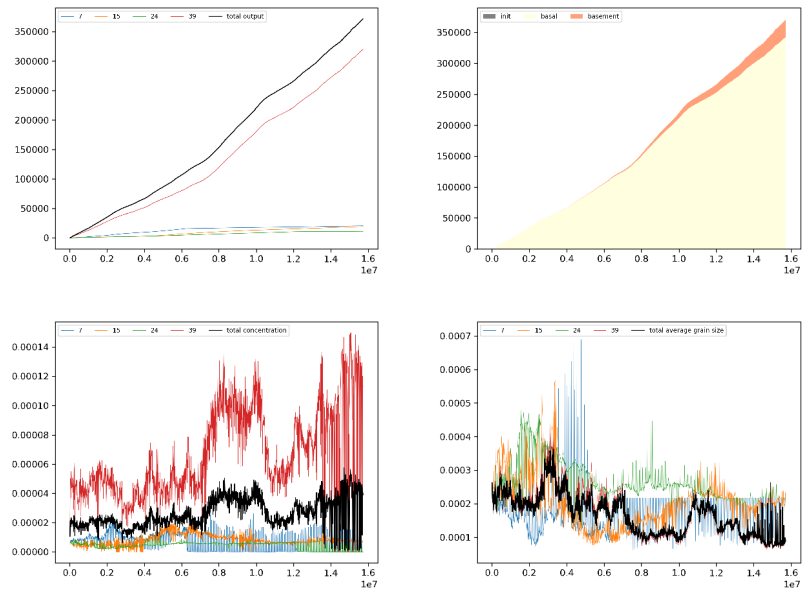

**Figure S55.** Outputs from the A8 default model run with a) volume flux b) detritus volume flux c) concentration d) grainsize. In a, c and d numbers indicate outlet node IDs

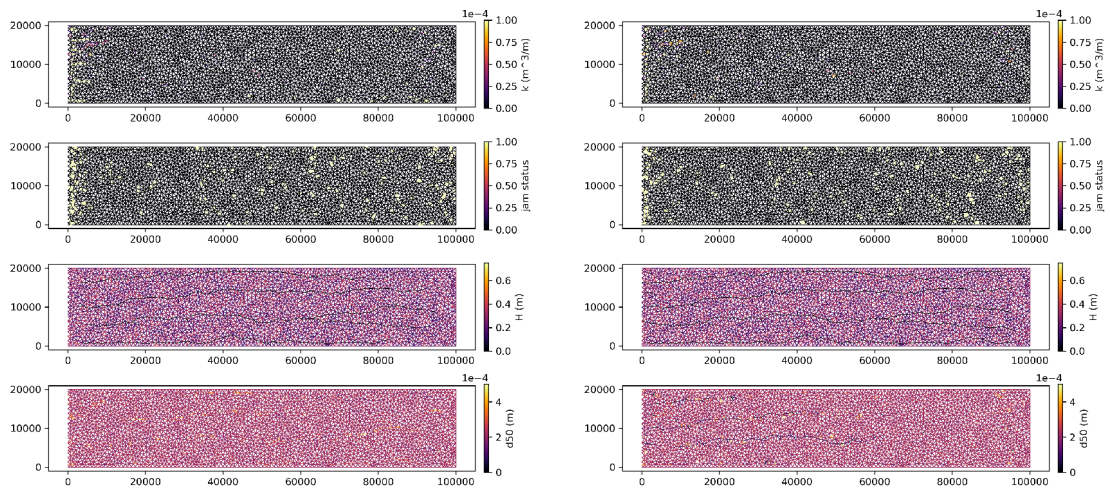

Figure S56. Results for the A8 default model rerun at a) week 0 and b) week 25

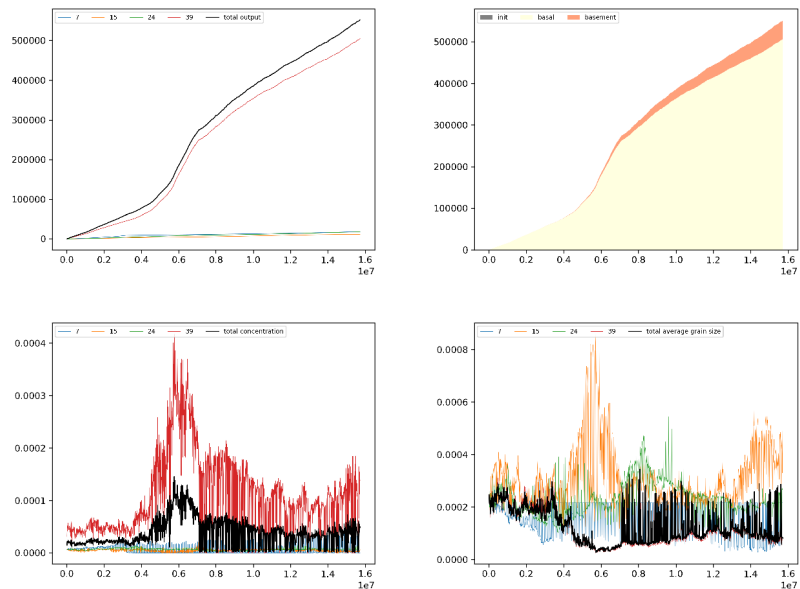

Figure S57. Outputs from the A8 default model rerun with a) volume flux b) detritus volume flux c) concentration d) grainsize. In a, c and d numbers indicate outlet node IDs

## S2.1.19 A8D default

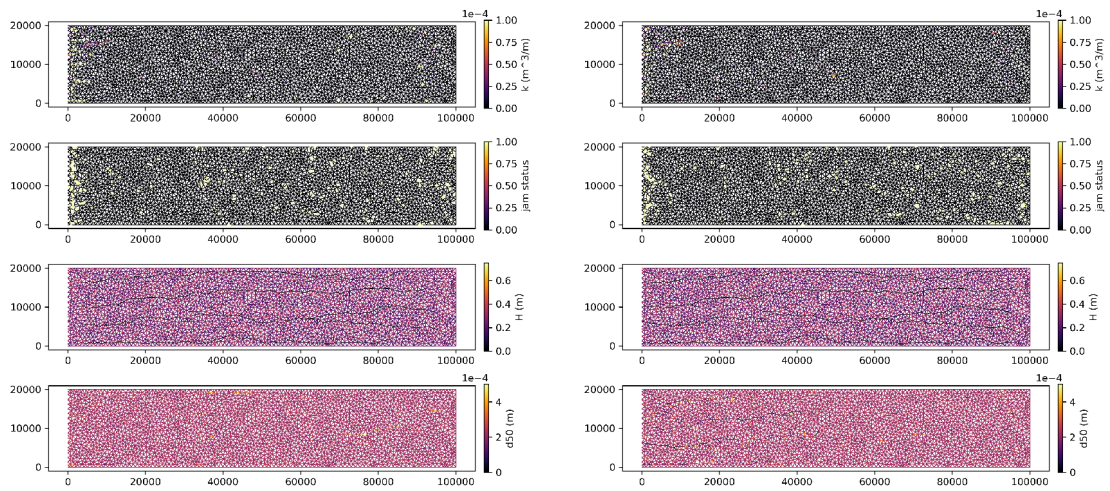

250

**Figure S58.** Results for the A8D default model run at a) week 0 and b) week 25

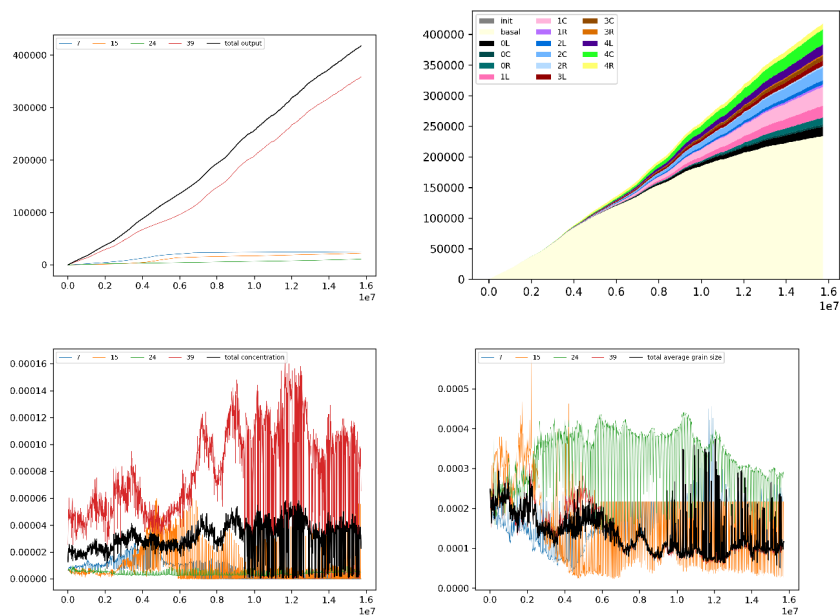

**Figure S59.** Outputs from the A8D default model run with a) volume flux b) detritus volume flux c) concentration d) grainsize. In a, c and d numbers indicate outlet node IDs

## S2.1.20 A8D default rerun

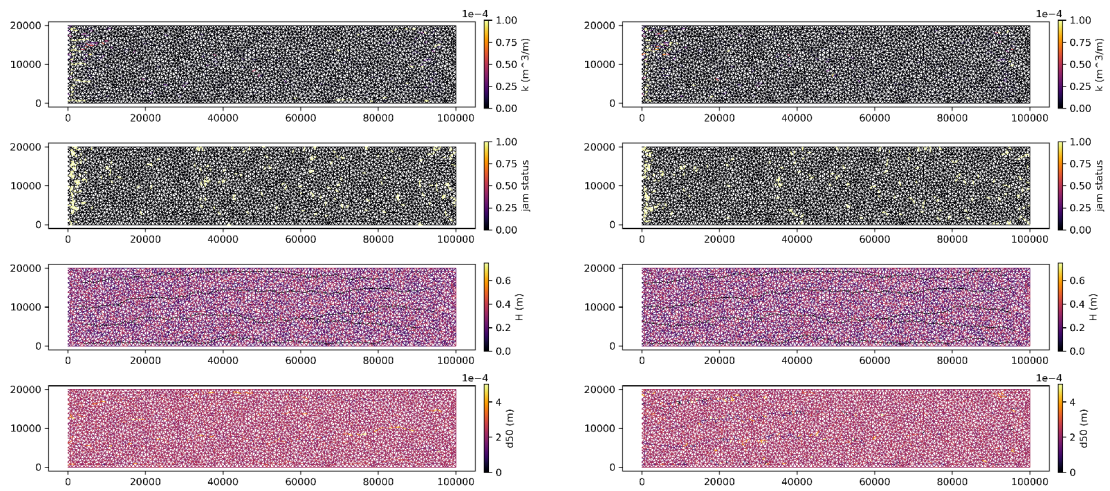

**Figure S60.** Results for the A8D default model rerun at a) week 0 and b) week 25

255

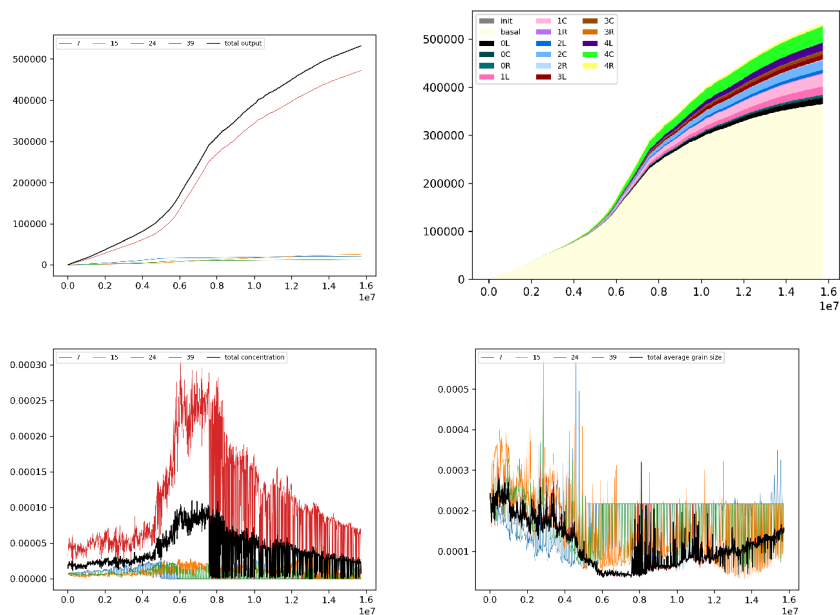

**Figure S61.** Outputs from the A8D default model rerun with a) volume flux b) detritus volume flux c) concentration d) grainsize. In a, c and d numbers indicate outlet node IDs

## S2.1.21 A6 reference

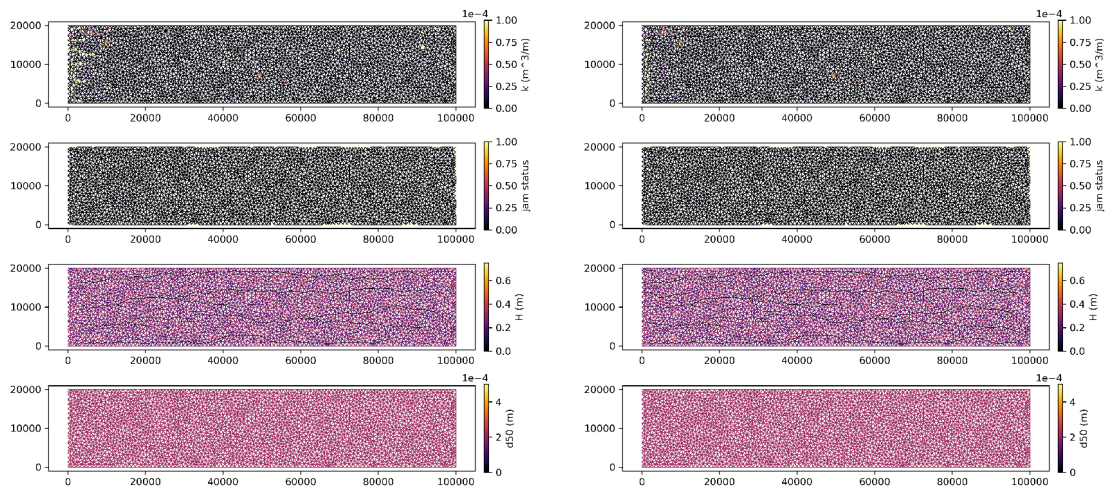

**Figure S62.** Results for the A6 reference model run at a) week 0 and b) week 25

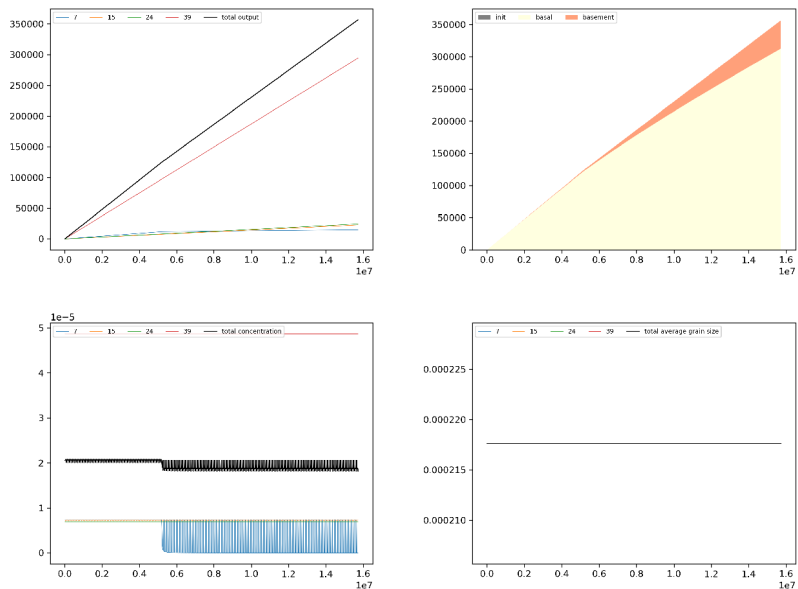

**Figure S63.** Outputs from the A6 reference model run with a) volume flux b) detritus volume flux c) concentration d) grainsize. In a, c and d numbers indicate outlet node IDs

## S2.1.22 A6 default

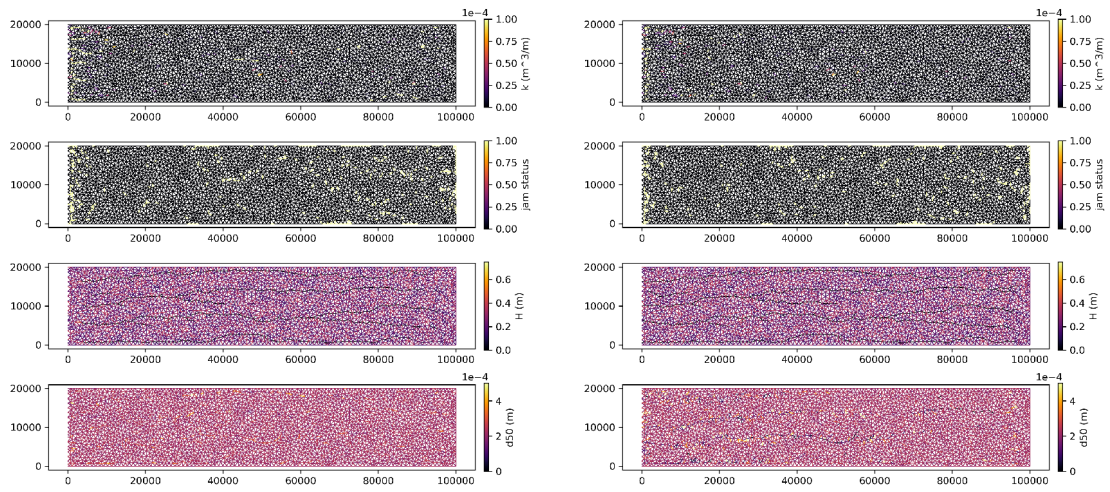

**Figure S64.** Results for the A6 default model run at a) week 0 and b) week 25

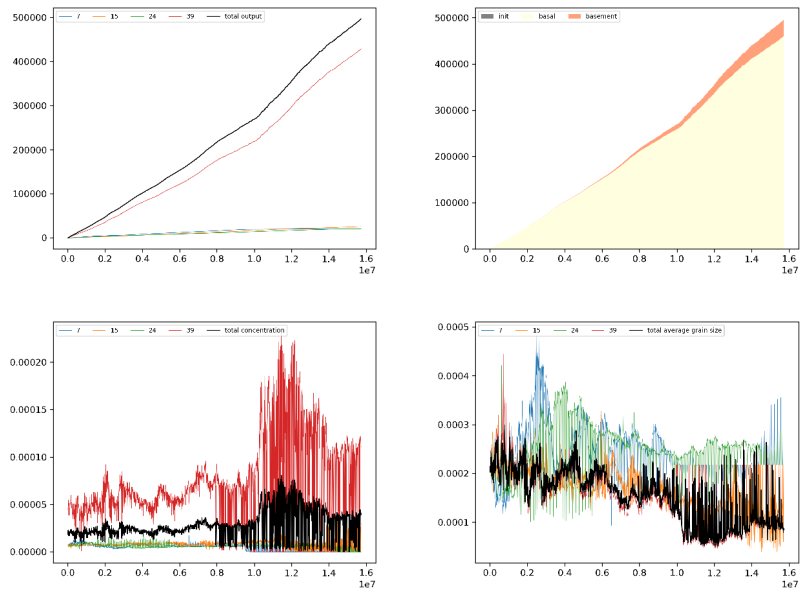

**Figure S65.** Outputs from the A6 default model run with a) volume flux b) detritus volume flux c) concentration d) grainsize. In a, c and d numbers indicate outlet node IDs

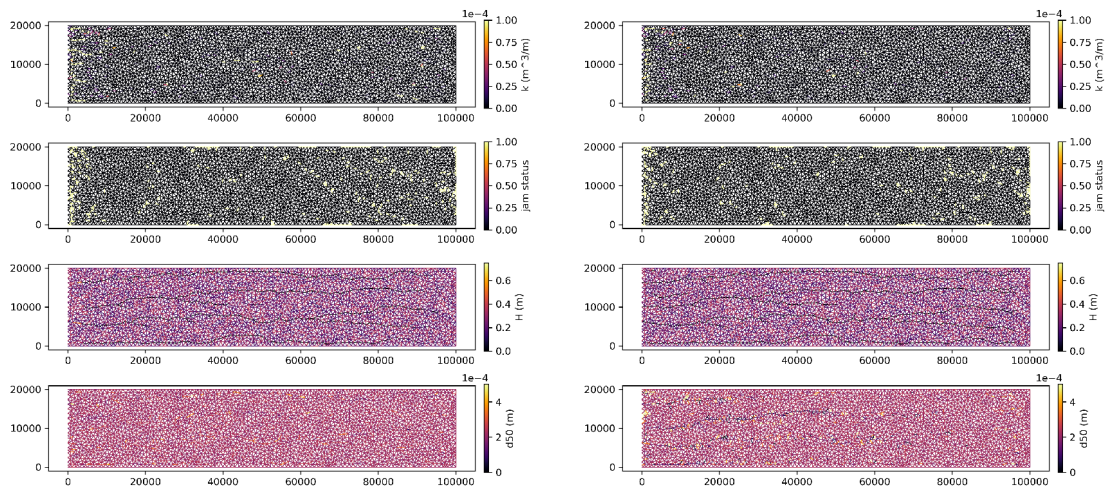

Figure S66. Results for the A6 default model rerun at a) week 0 and b) week 25

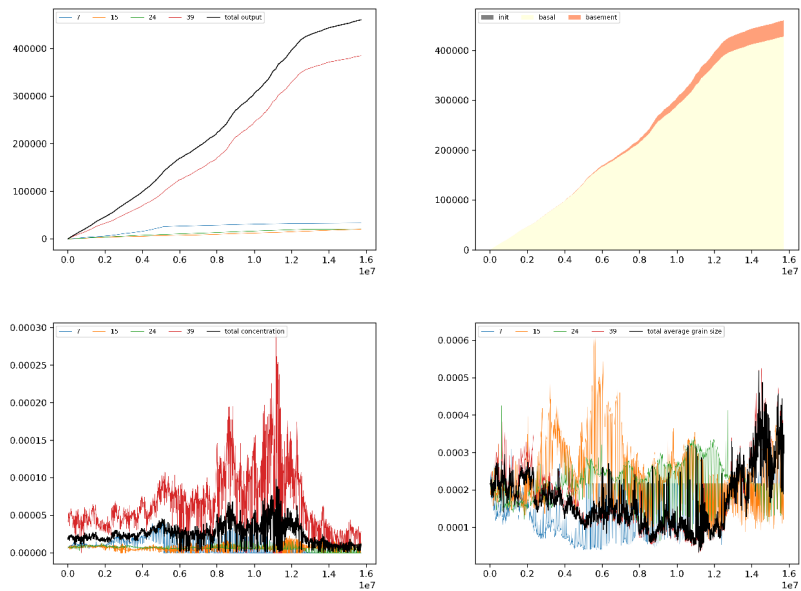

Figure S67. Outputs from the A6 default model rerun with a) volume flux b) detritus volume flux c) concentration d) grainsize. In a, c and d numbers indicate outlet node IDs



## S2.1.24 A6D default

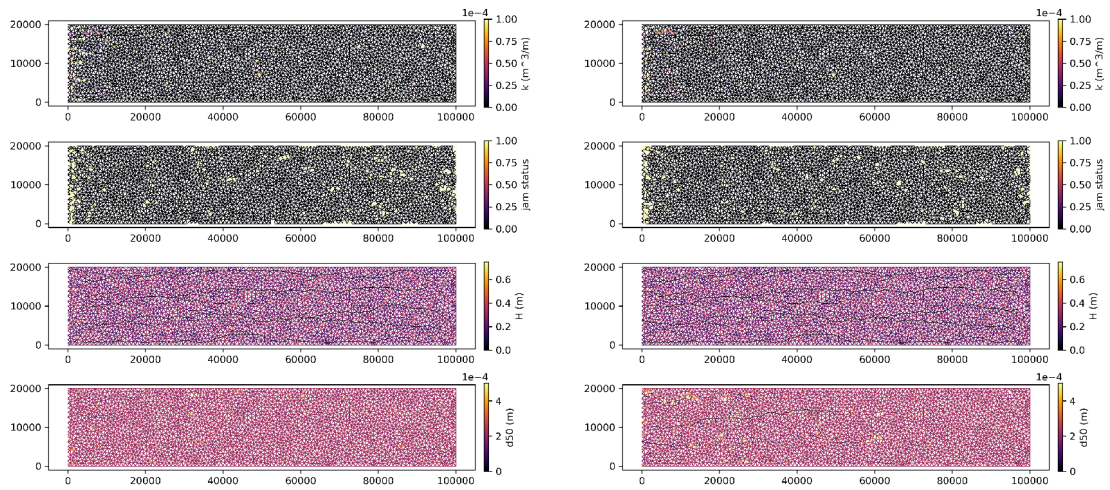

270

**Figure S68.** Results for the A6D default model run at a) week 0 and b) week 25

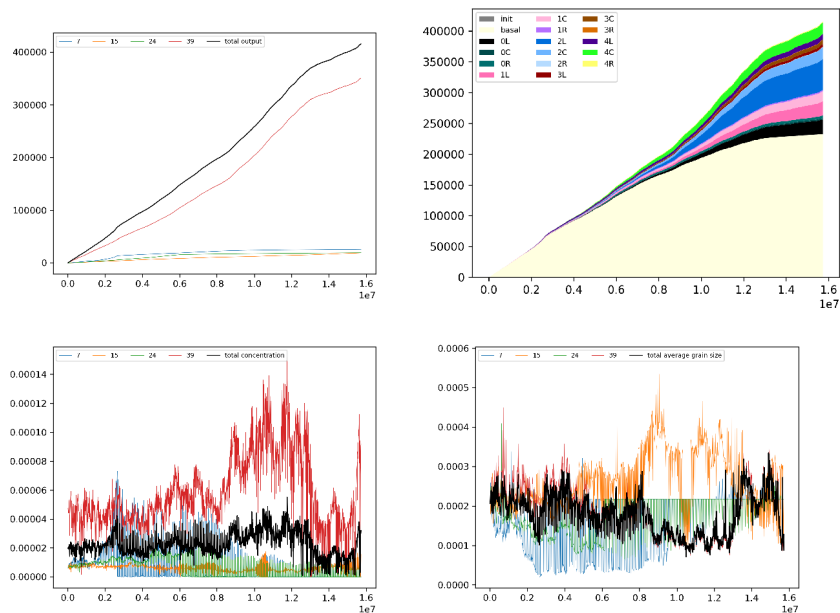

**Figure S69.** Outputs from the A6D default model run with a) volume flux b) detritus volume flux c) concentration d) grainsize. In a, c and d numbers indicate outlet node IDs

## S2.1.25 A6D default rerun

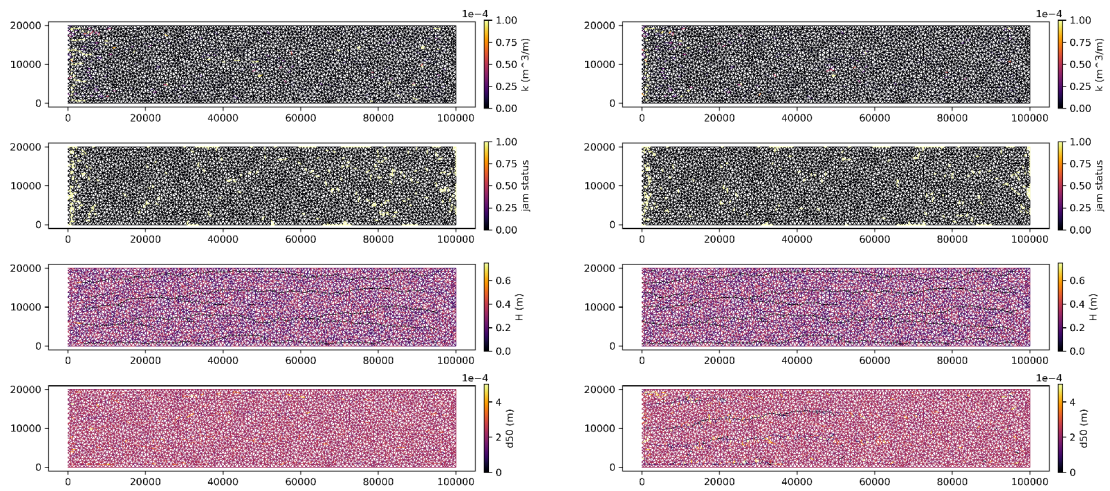

Figure S70. Results for the A6D default model rerun at a) week 0 and b) week 25

275

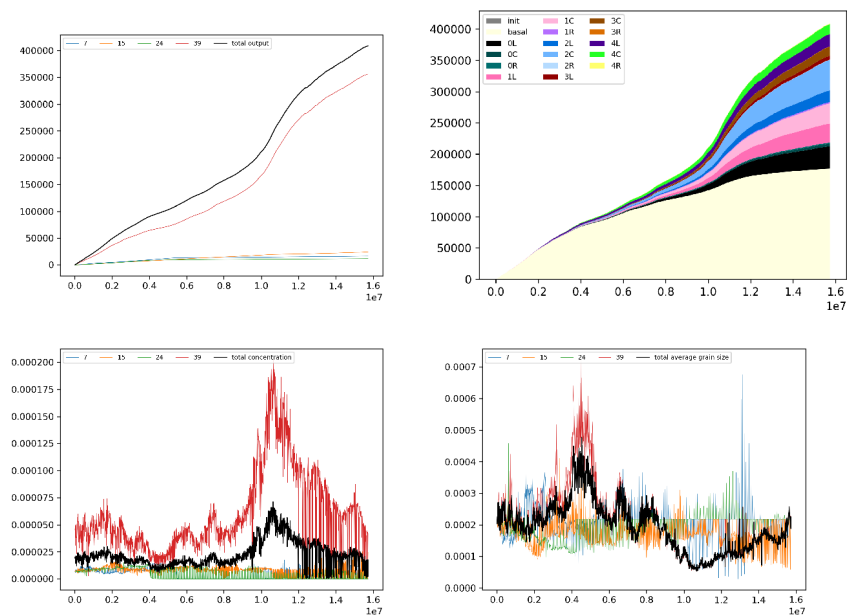

Figure S71. Outputs from the A6D default model rerun with a) volume flux b) detritus volume flux c) concentration d) grainsize. In a, c and d numbers indicate outlet node IDs

## S2.2 Experiment Set 2

### S2.2.1 $\phi = 3.2$

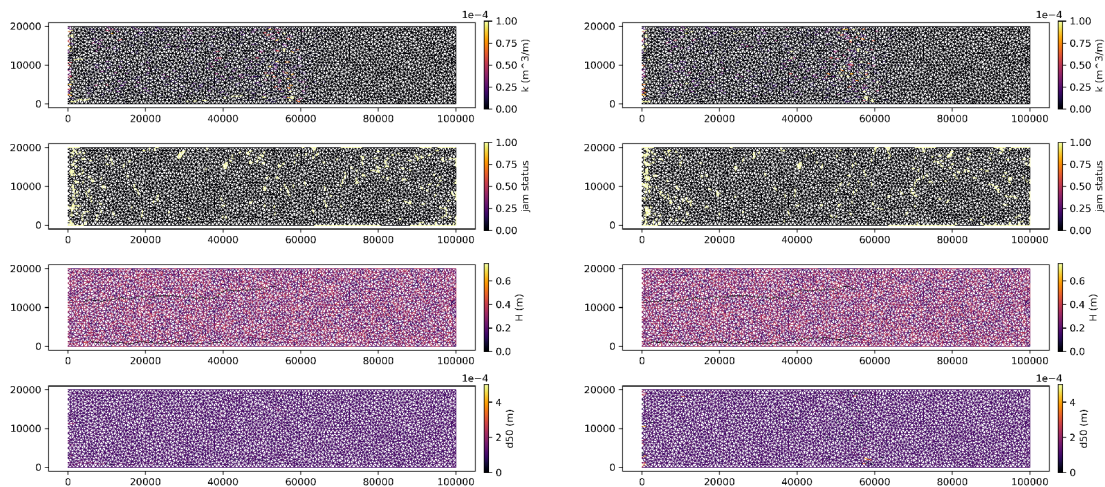

**Figure S72.** Results for the  $\phi = 3.2$  model run at a) week 0 and b) week 25

280

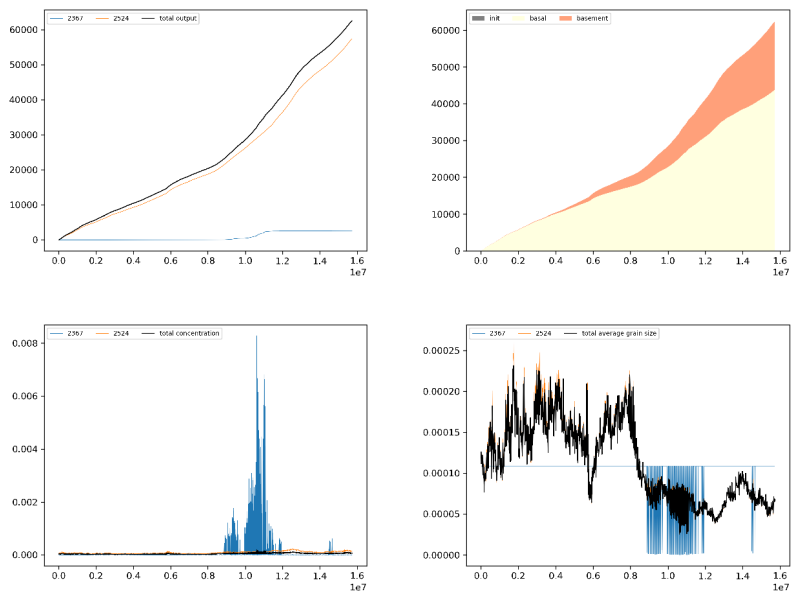

**Figure S73.** Outputs from the  $\phi = 3.2$  model run with a) volume flux b) detritus volume flux c) concentration d) grainsize. In a, c and d numbers indicate outlet node IDs

S2.2.2  $\phi = 1.2$

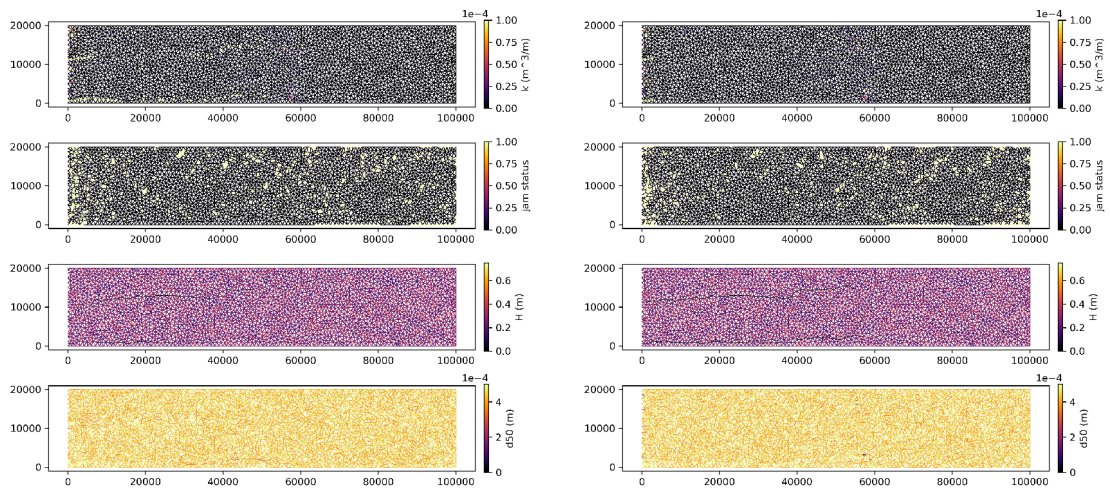

Figure S74. Results for the  $\phi = 1.2$  model run at a) week 0 and b) week 25

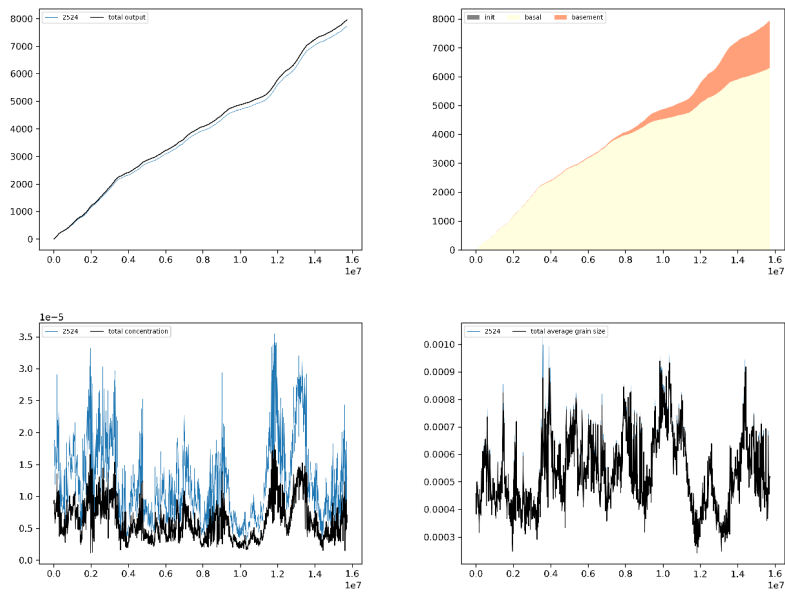

285

Figure S75. Outputs from the  $\phi = 1.2$  model run with a) volume flux b) detritus volume flux c) concentration d) grainsize. In a, c and d numbers indicate outlet node IDs

### S2.2.3 $\zeta = 1$

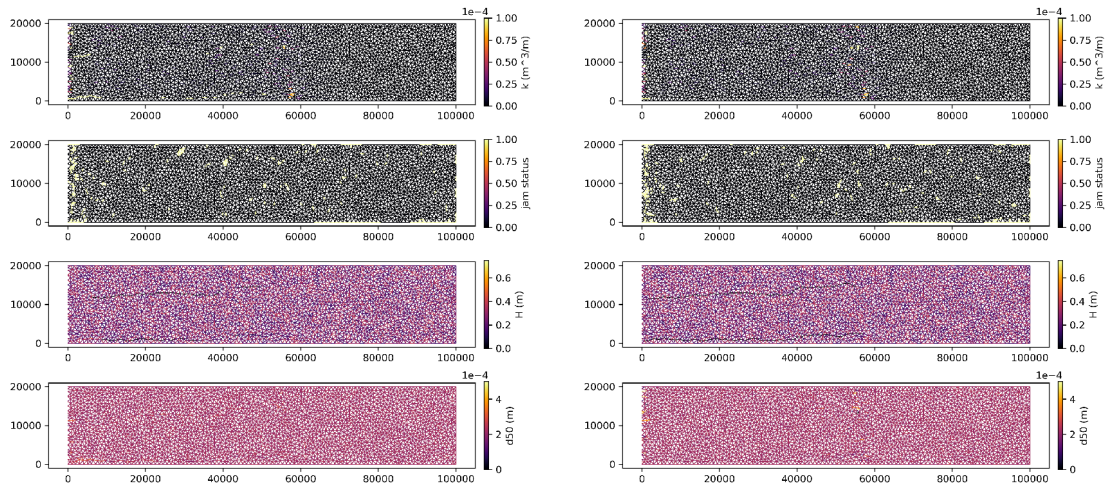

**Figure S76.** Results for the  $\zeta = 1$  model run at a) week 0 and b) week 25

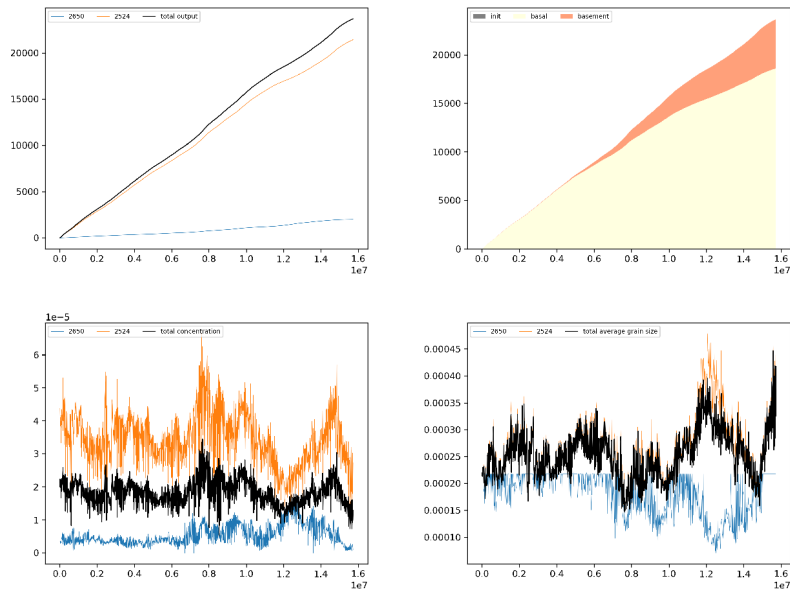

**Figure S77.** Outputs from the  $\zeta = 1$  model run with a) volume flux b) detritus volume flux c) concentration d) grainsize. In a, c and d numbers indicate outlet node IDs

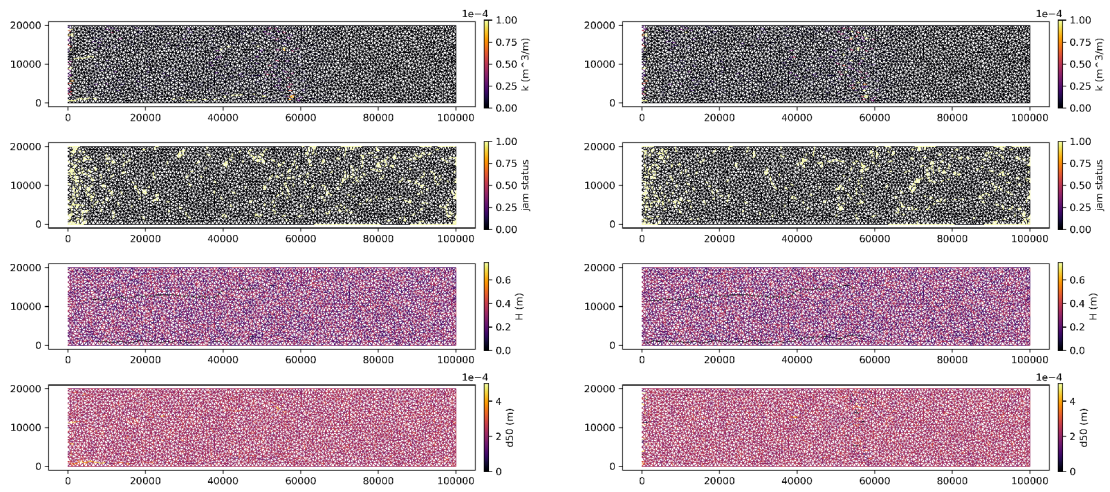

**Figure S78.** Results for the  $\zeta = 2$  model run at a) week 0 and b) week 25

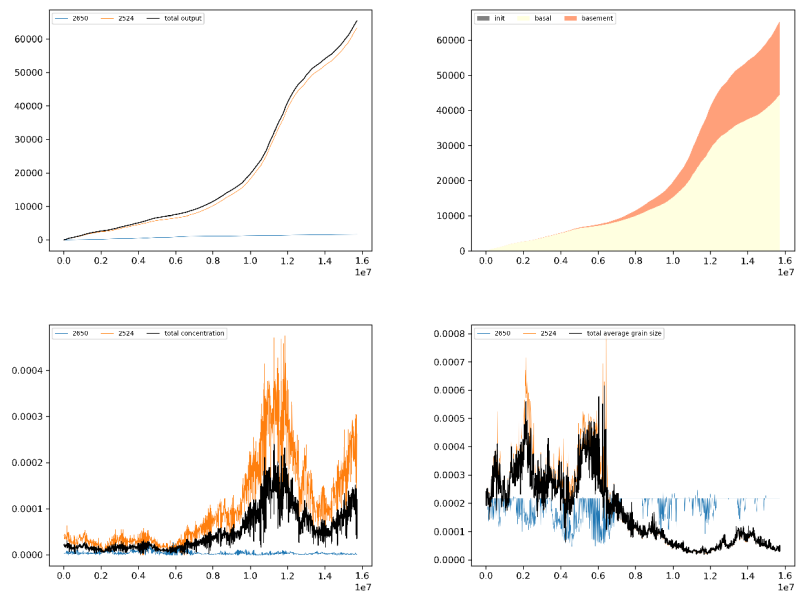

**Figure S79.** Outputs from the  $\zeta = 2$  model run with a) volume flux b) detritus volume flux c) concentration d) grainsize. In a, c and d numbers indicate outlet node IDs

S2.2.5  $\rho_s = 2550$

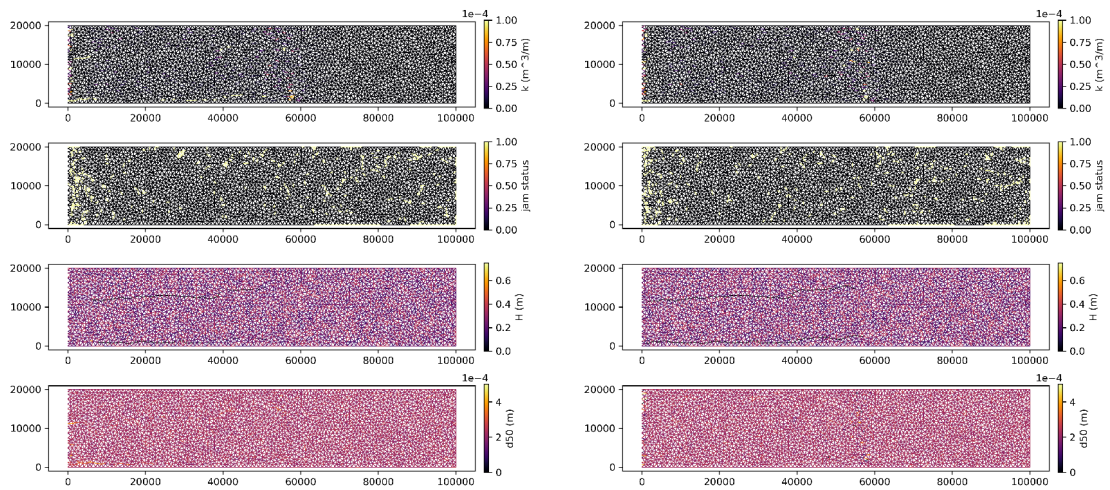

295

Figure S80. Results for the low grain density model run at a) week 0 and b) week 25

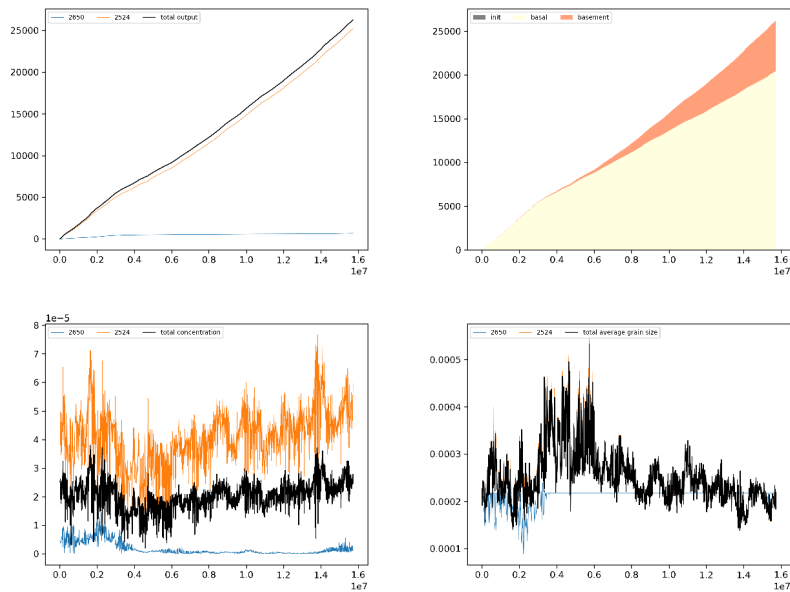

Figure S81. Outputs from the low grain density model run with a) volume flux b) detritus volume flux c) concentration d) grain size. In a, c and d numbers indicate outlet node IDs

S2.2.6  $\rho_s = 2750$

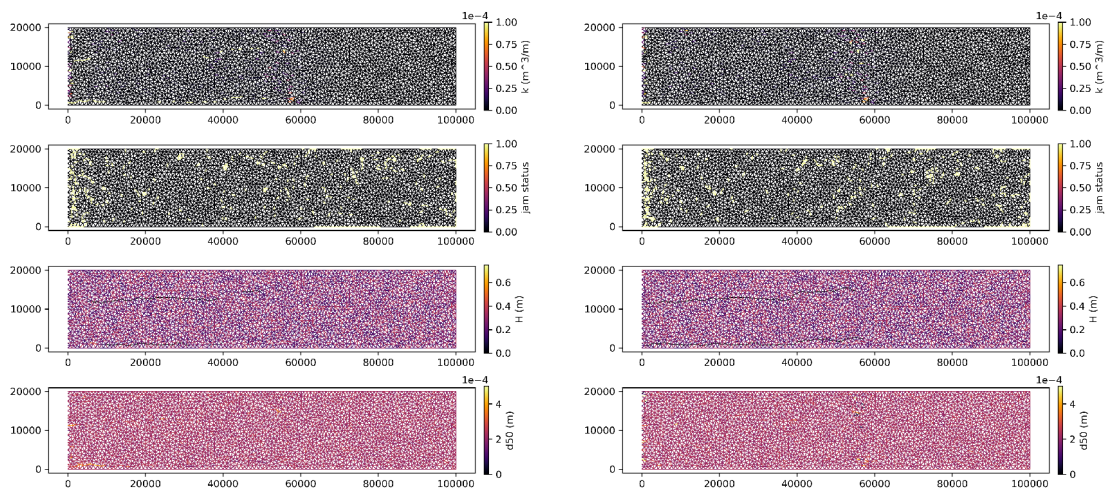

Figure S82. Results for the high grain density model run at a) week 0 and b) week 25

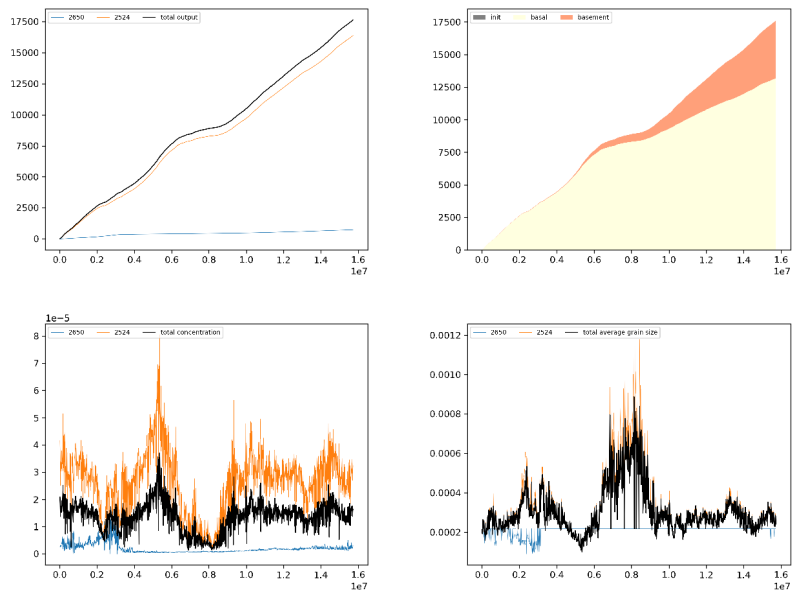

Figure S83. Outputs from the high grain density model run with a) volume flux b) detritus volume flux c) concentration d) grain size. In a, c and d numbers indicate outlet node IDs



S2.2.7  $h_s = 0.05$

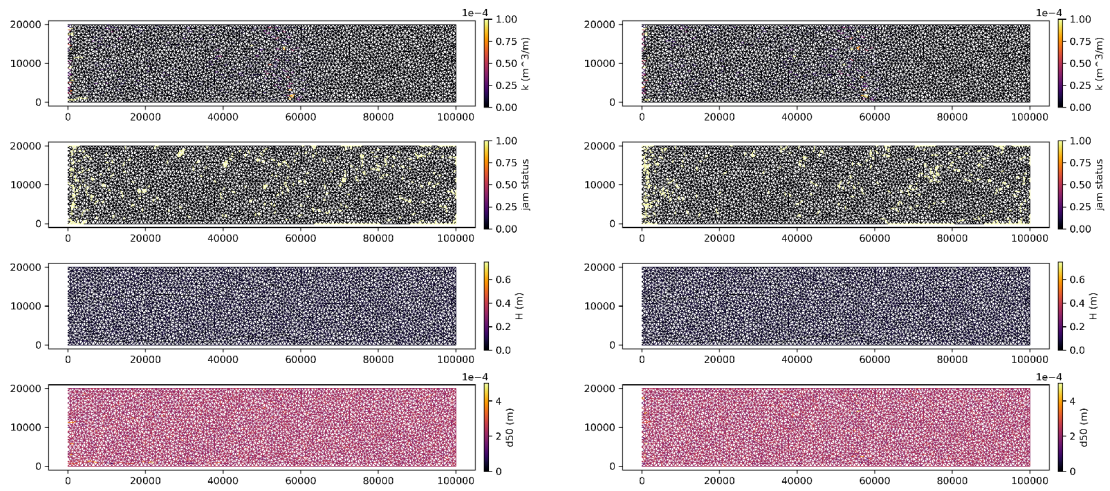

Figure S84. Results for the low sediment thickness model run at a) week 0 and b) week 25

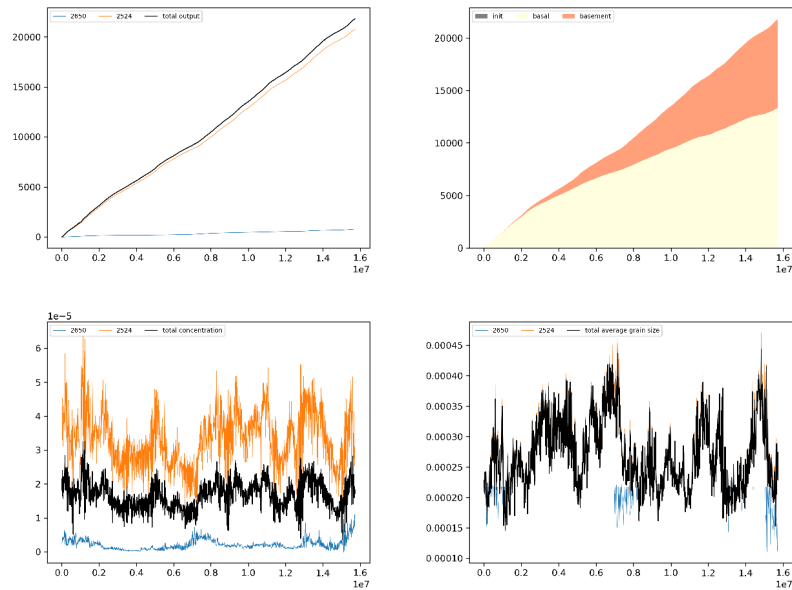

305

Figure S85. Outputs from the low sediment thickness model run with a) volume flux b) detritus volume flux c) concentration d) grainsize. In a, c and d numbers indicate outlet node IDs

## S2.2.8 $h_s = 0.5$

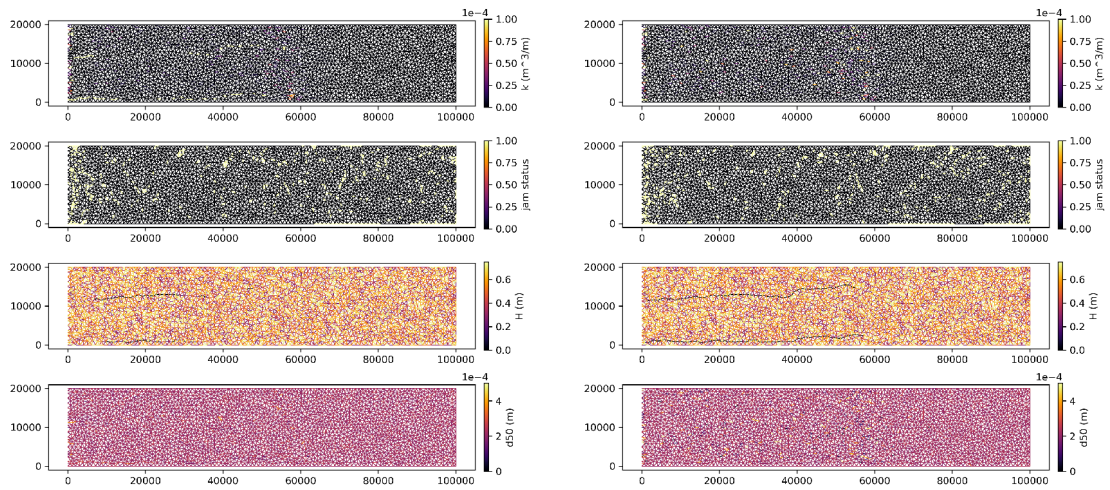

**Figure S86.** Results for the high sediment thickness model run at a) week 0 and b) week 25

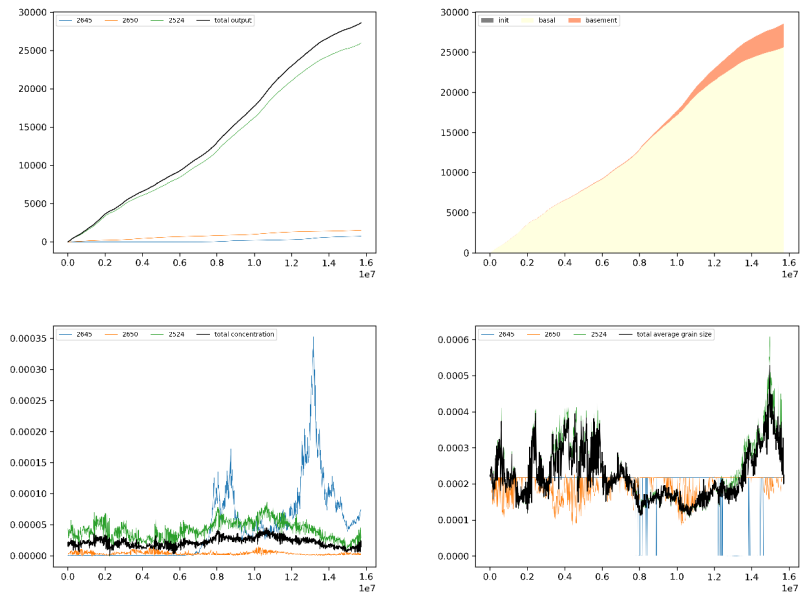

**Figure S87.** Outputs from the high sediment thickness model run with a) volume flux b) detritus volume flux c) concentration d) grain size. In a, c and d numbers indicate outlet node IDs

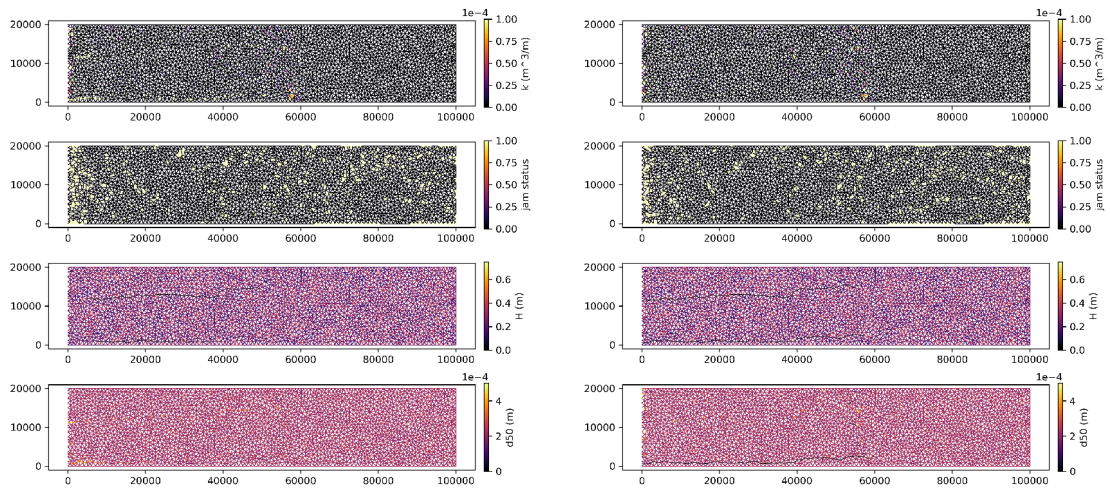

**Figure S88.** Results for the  $\Delta\sigma = 0.005$  model run at a) week 0 and b) week 25

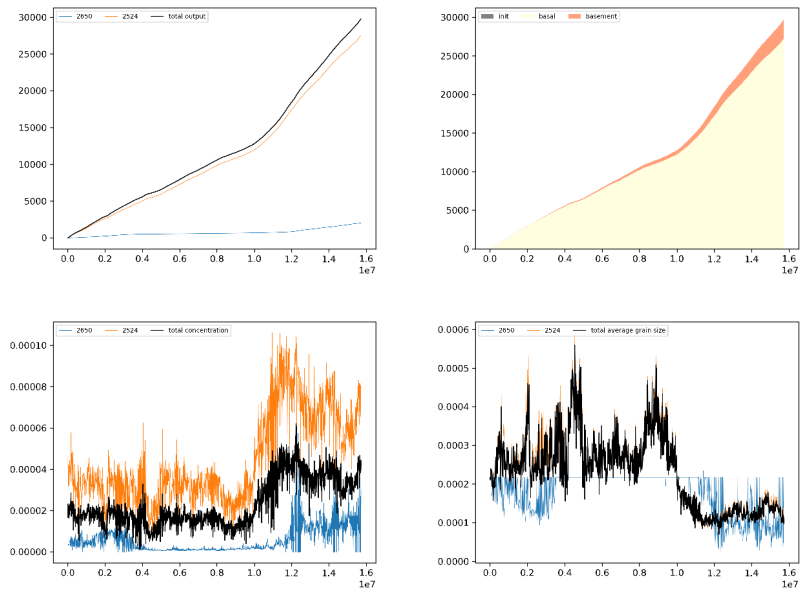

**Figure S89.** Outputs from the  $\Delta\sigma = 0.005$  model run with a) volume flux b) detritus volume flux c) concentration d) grainsize. In a, c and d numbers indicate outlet node IDs

## S2.2.10 $\Delta\sigma = 0.01$

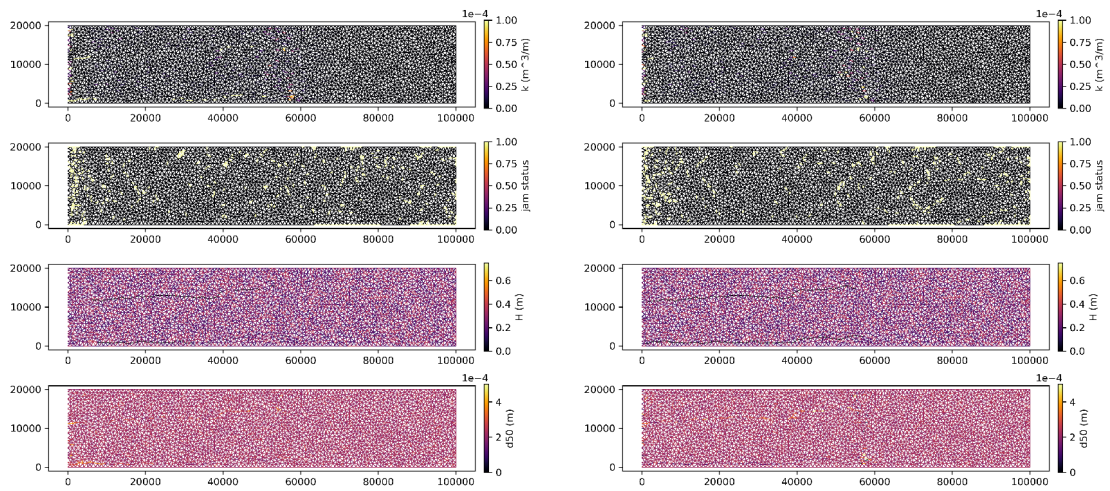

315

**Figure S90.** Results for the  $\Delta\sigma = 100$  model run at a) week 0 and b) week 25

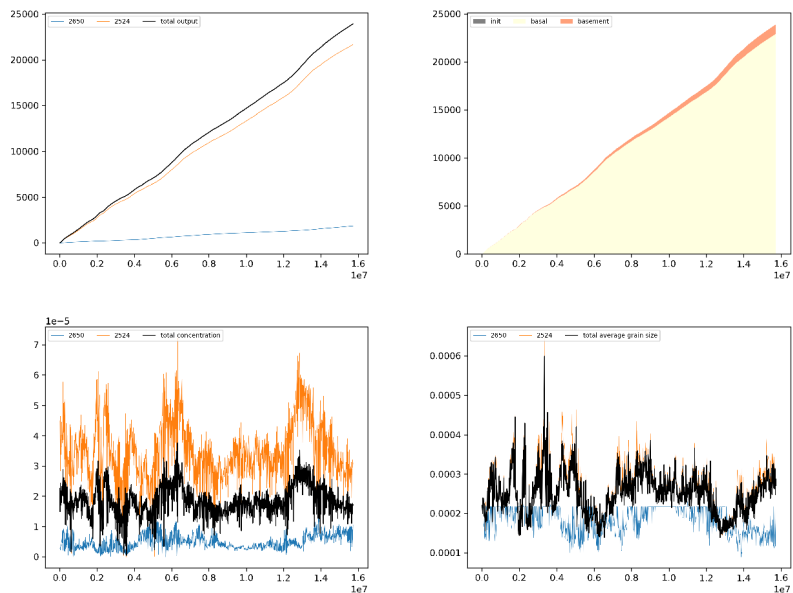

**Figure S91.** Outputs from the  $\Delta\sigma = 0.01$  model run with a) volume flux b) detritus volume flux c) concentration d) grainsize. In a, c and d numbers indicate outlet node IDs

### S2.2.11 Erosion scaling $\dot{\epsilon} = 1e^{-7}u_b^{2.02}$

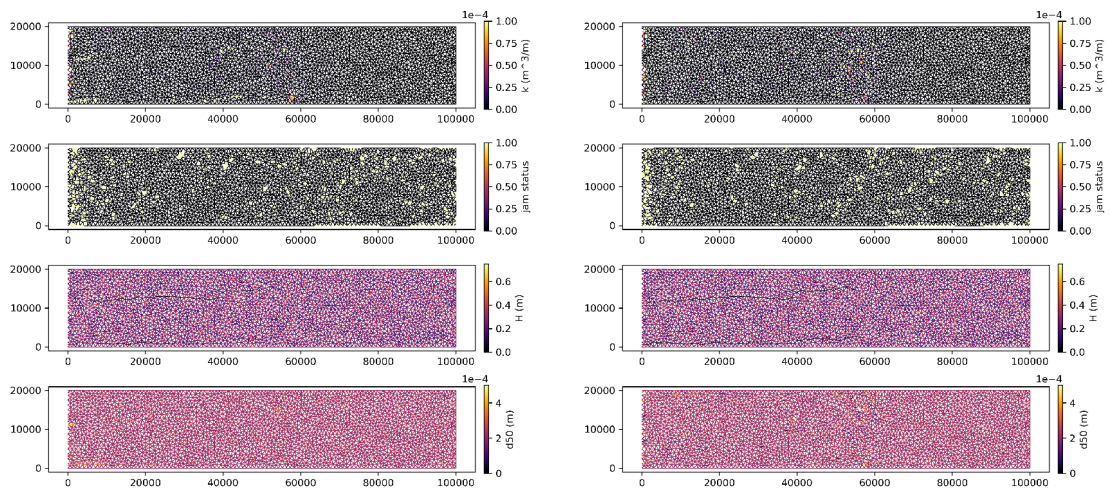

**Figure S92.** Results for the  $\dot{\epsilon} = 1e^{-7}u_b^{2.02}$  model run at a) week 0 and b) week 25

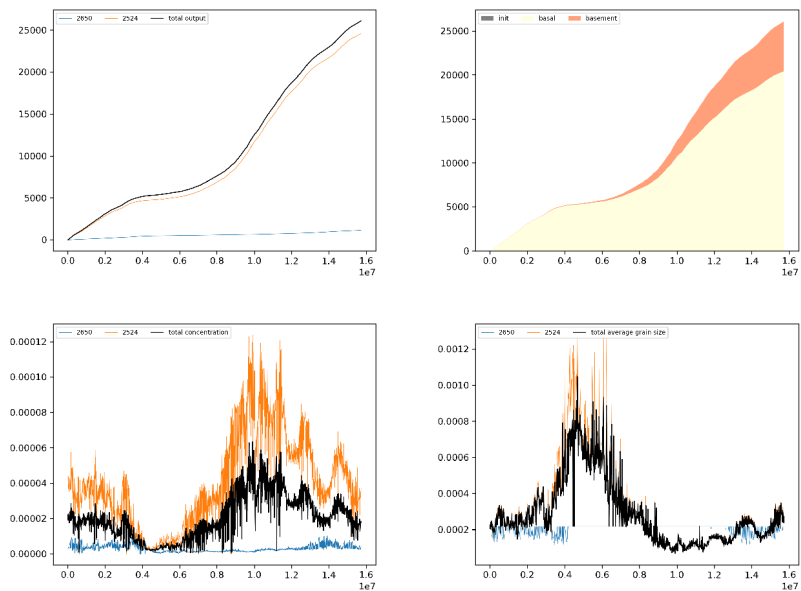

**Figure S93.** Outputs from the  $\dot{\epsilon} = 1e^{-7}u_b^{2.02}$  model run with a) volume flux b) detritus volume flux c) concentration d) grainsize. In a, c and d numbers indicate outlet node IDs

### S2.2.12 Erosion scaling $\dot{\epsilon} = 1e^{-4}u_b$

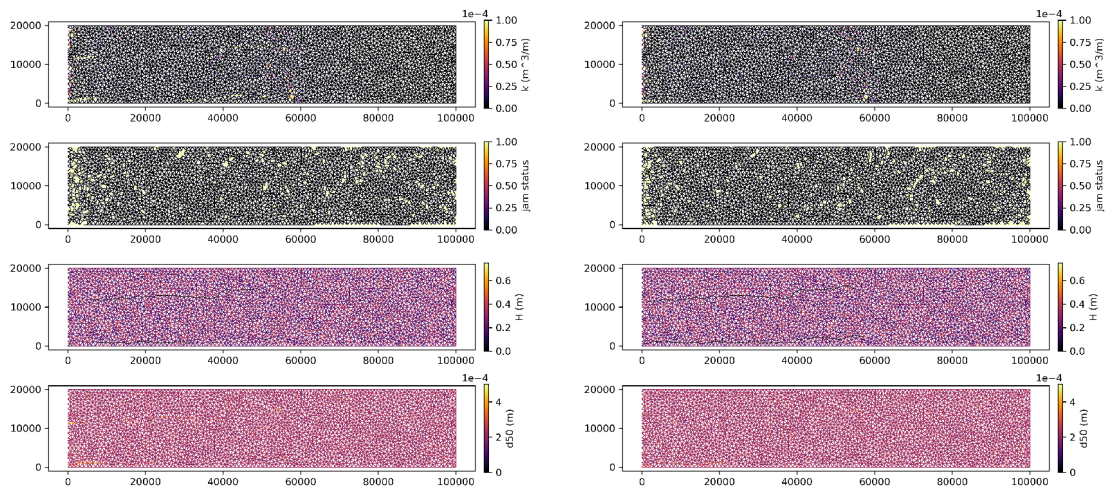

**Figure S94.** Results for the  $\dot{\epsilon} = 1e^{-4}u_b$  model run at a) week 0 and b) week 25

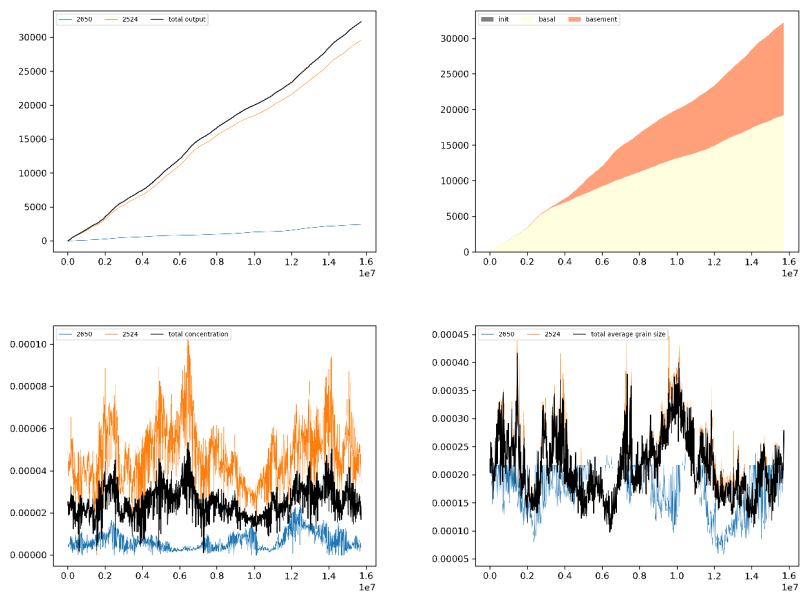

325

**Figure S95.** Outputs from the  $\dot{\epsilon} = 1e^{-4}u_b$  model run with a) volume flux b) detritus volume flux c) concentration d) grainsize. In a, c and d numbers indicate outlet node IDs

### S2.2.13 Erosion scaling $\dot{\epsilon} = 2e^{-4}u_b$

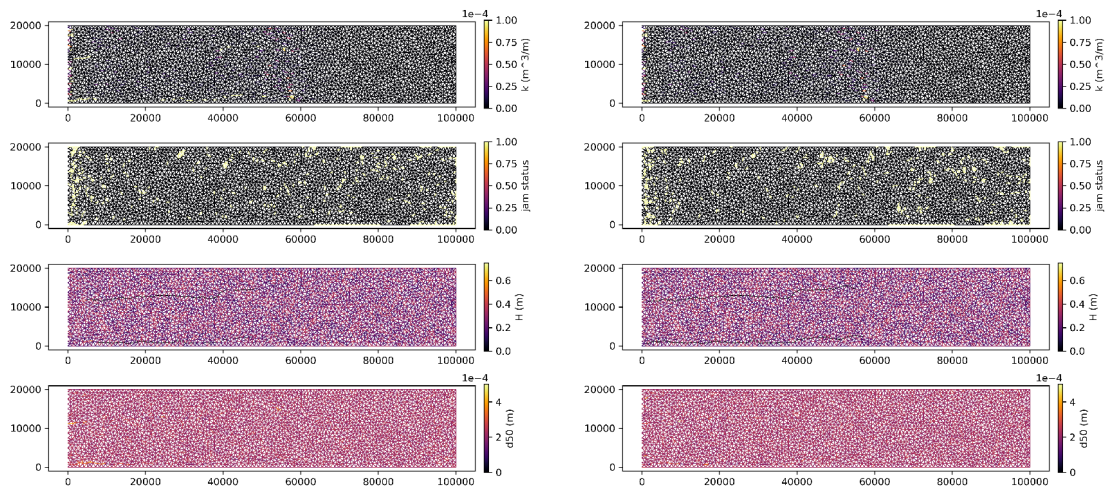

**Figure S96.** Results for the  $\dot{\epsilon} = 2e^{-4}u_b$  model run at a) week 0 and b) week 25

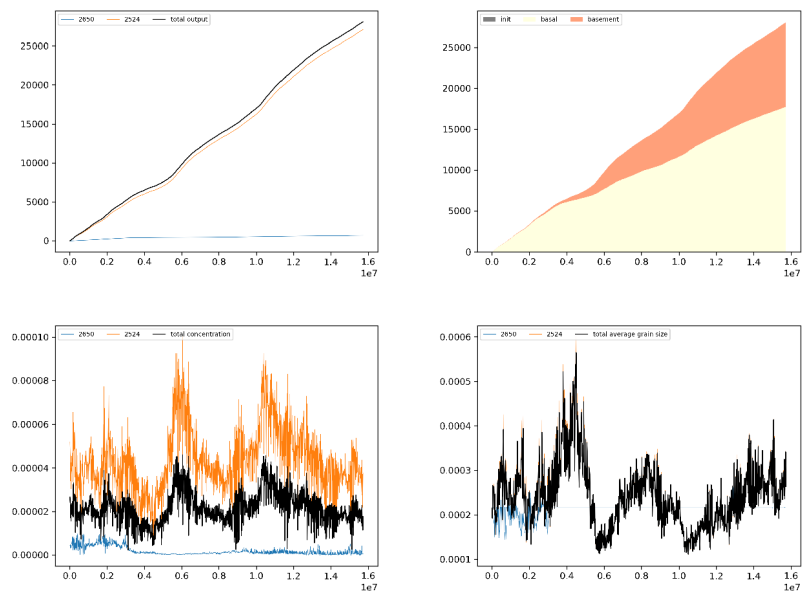

**Figure S97.** Outputs from the  $\dot{\epsilon} = 2e^{-4}u_b$  model run with a) volume flux b) detritus volume flux c) concentration d) grainsize. In a, c and d numbers indicate outlet node IDs

## S2.3.1 B1 reference

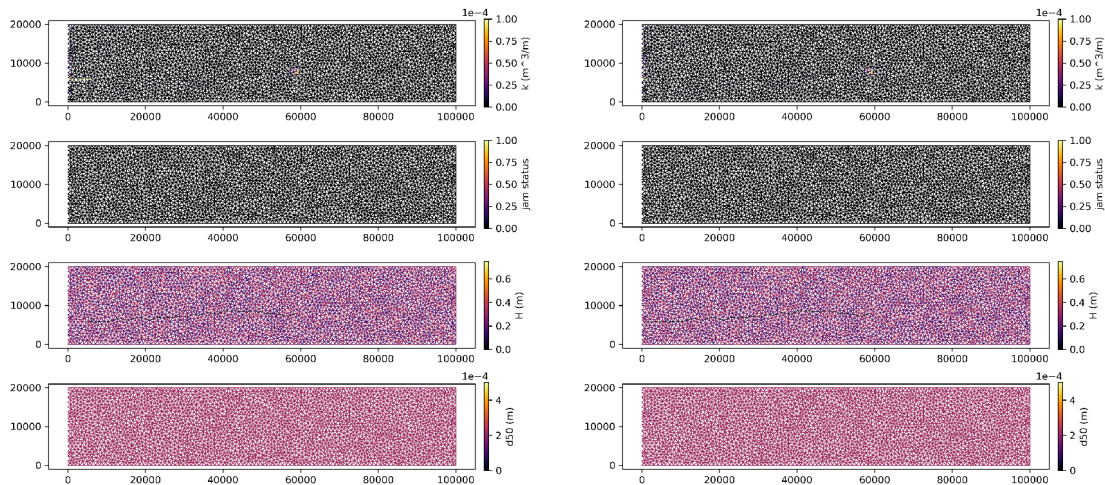

Figure S98. Results for the B1 reference model run at a) week 0 and b) week 25

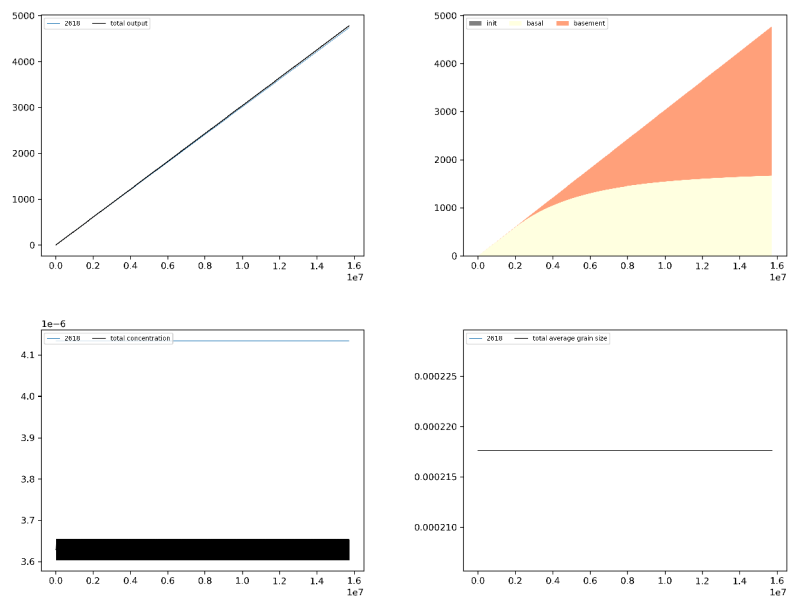

Figure S99. Outputs from the B1 reference model run with a) volume flux b) detritus volume flux c) concentration d) grainsize. In a, c and d numbers indicate outlet node IDs



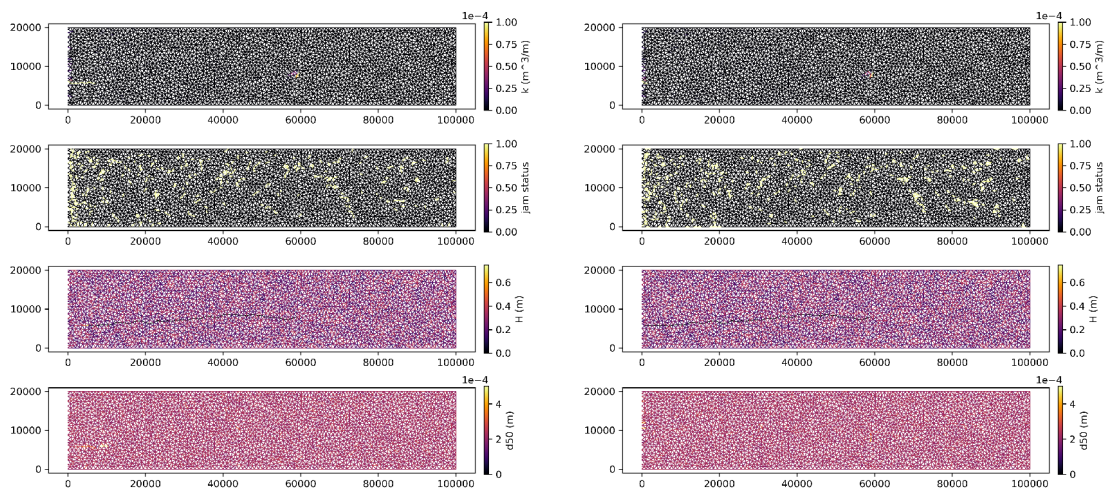

Figure S100. Results for the B1 default model run at a) week 0 and b) week 25

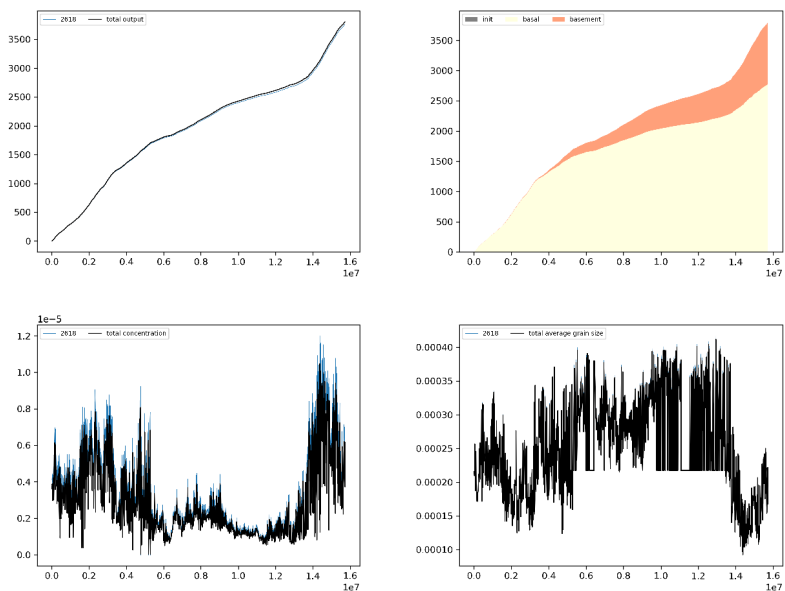

Figure S101. Outputs from the B1 default model run with a) volume flux b) detritus volume flux c) concentration d) grainsize. In a, c and d numbers indicate outlet node IDs

### S2.3.3 B1 default rerun

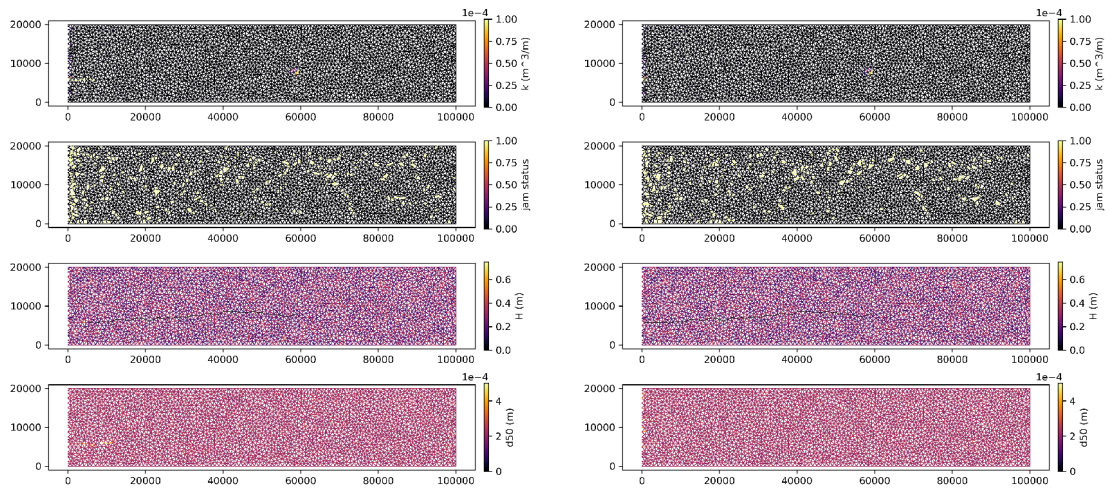

340

**Figure S102.** Results for the B1 default model rerun at a) week 0 and b) week 25

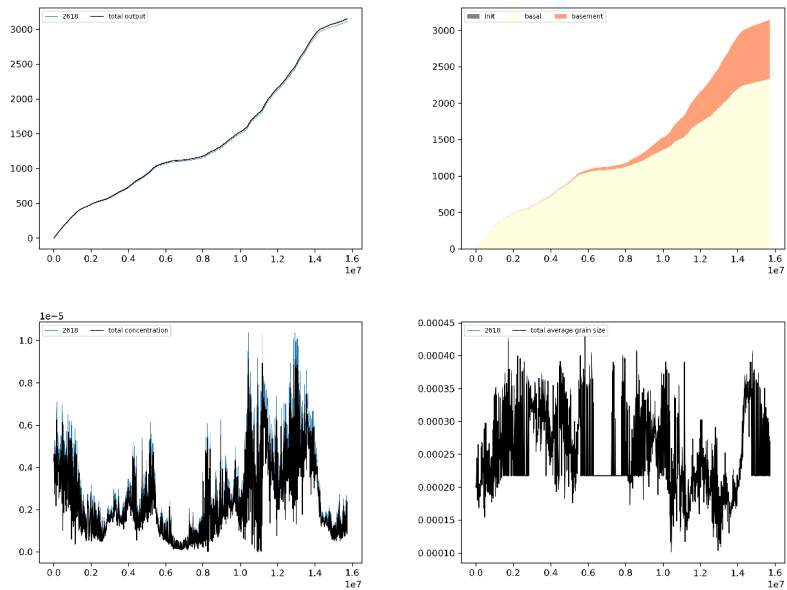

**Figure S103.** Outputs from the B1 default model rerun with a) volume flux b) detritus volume flux c) concentration d) grainsize. In a, c and d numbers indicate outlet node IDs

### S2.3.4 BID default

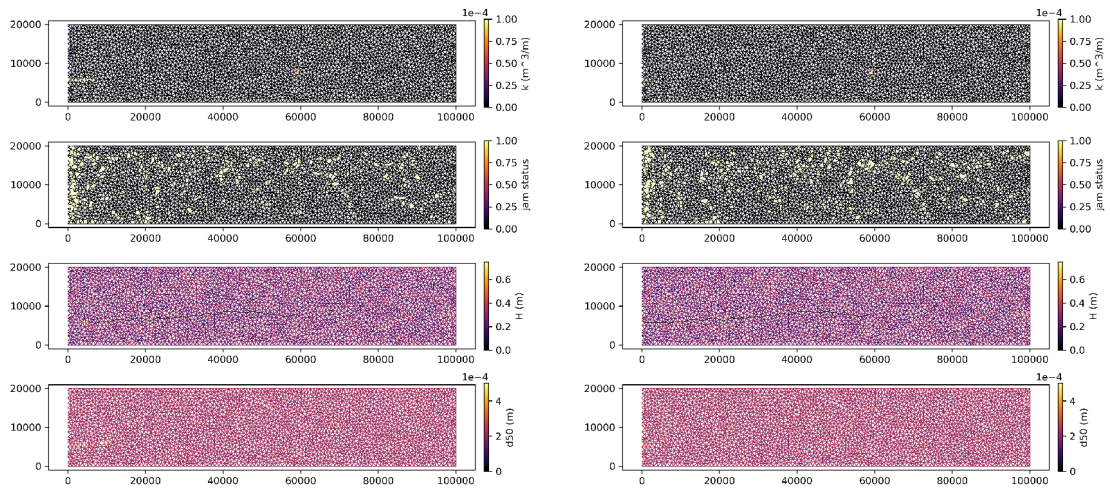

**Figure S104.** Results for the BID default model run at a) week 0 and b) week 25

345

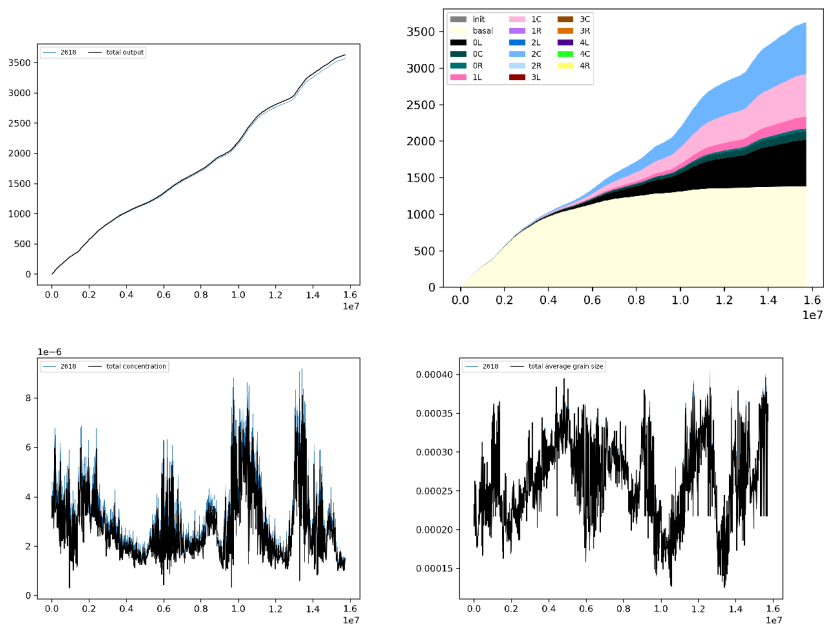

**Figure S105.** Outputs from the BID default model run with a) volume flux b) detritus volume flux c) concentration d) grainsize. In a, c and d numbers indicate outlet node IDs

### S2.3.5 B2 reference

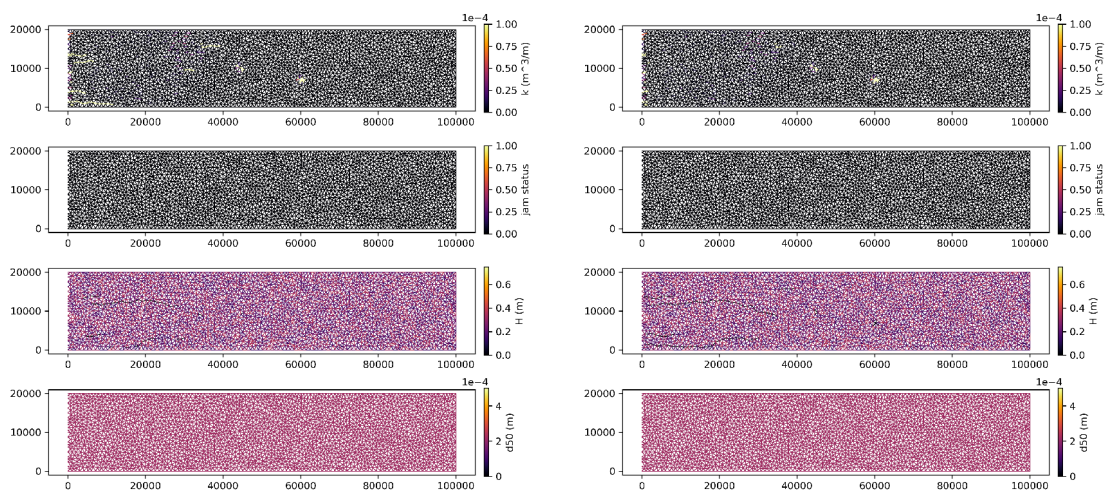

**Figure S106.** Results for the B2 reference model run at a) week 0 and b) week 25

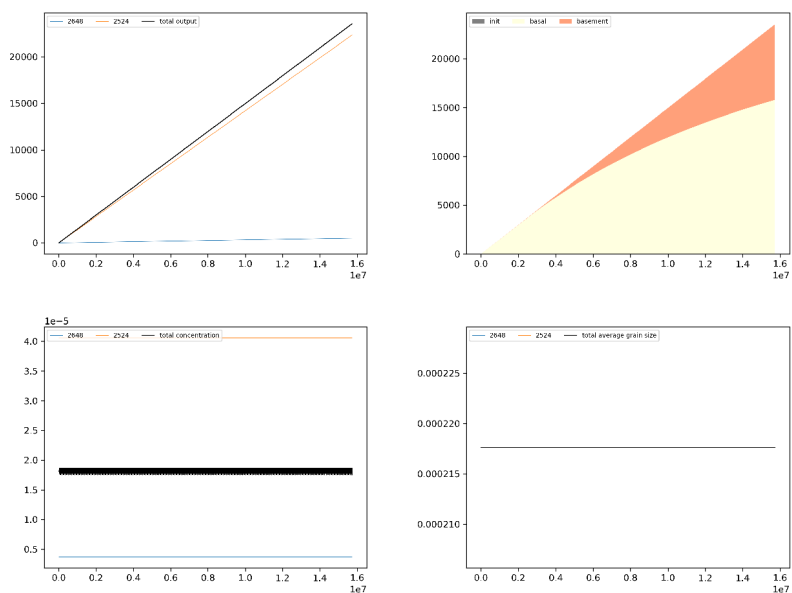

**Figure S107.** Outputs from the B2 reference model run with a) volume flux b) detritus volume flux c) concentration d) grainsize. In a, c and d numbers indicate outlet node IDs

### S2.3.6 B2 default

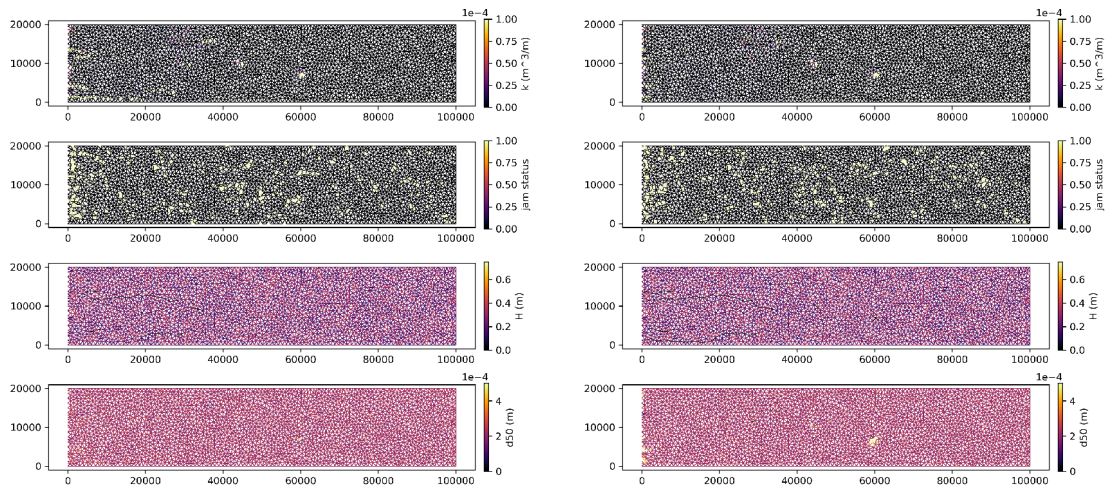

**Figure S108.** Results for the B2 default model run at a) week 0 and b) week 25

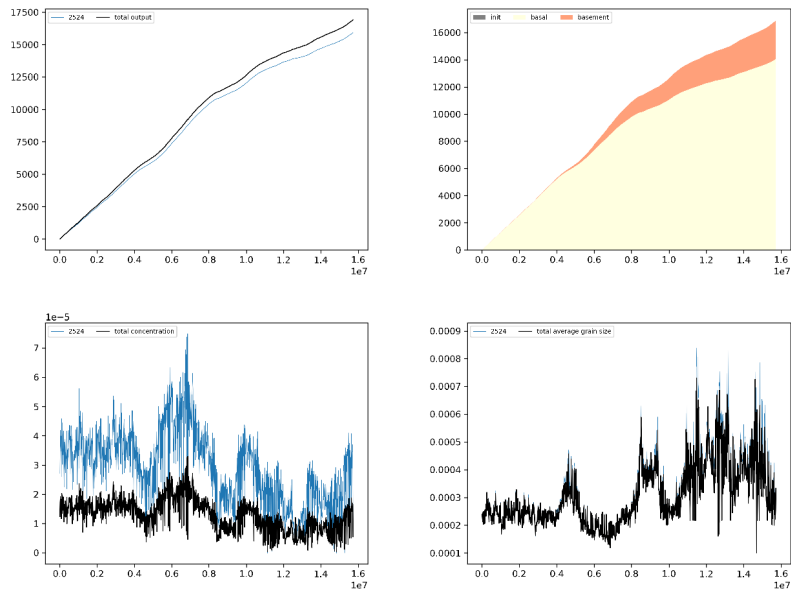

**Figure S109.** Outputs from the B2 default model run with a) volume flux b) detritus volume flux c) concentration d) grainsize. In a, c and d numbers indicate outlet node IDs

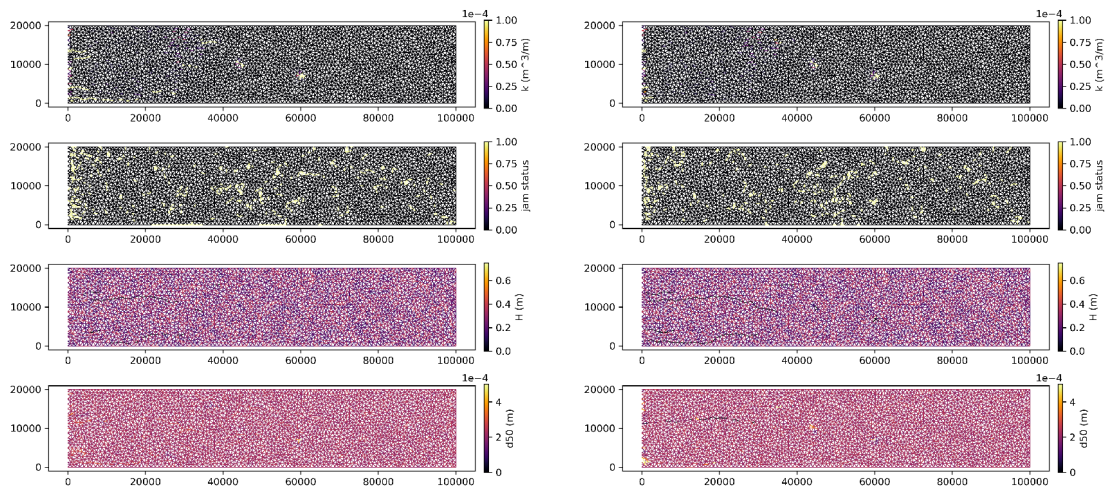

Figure S110. Results for the B2 default model rerun at a) week 0 and b) week 25

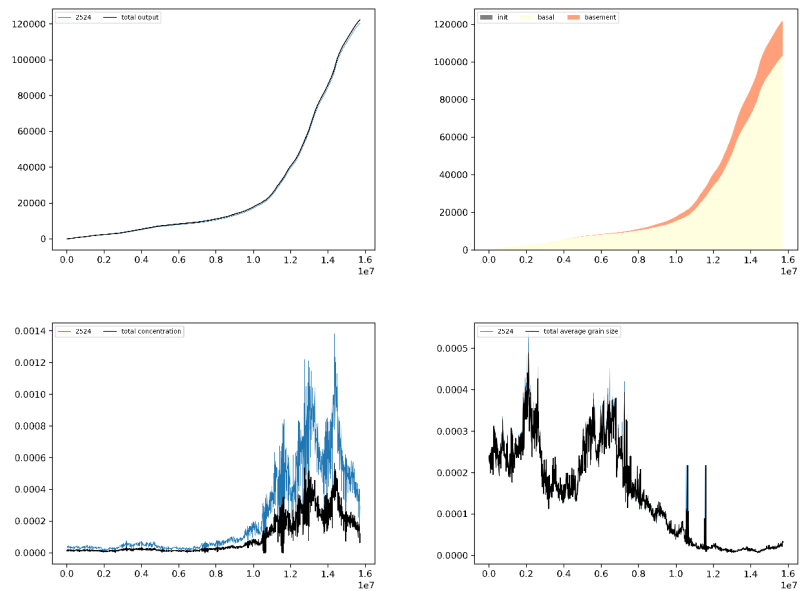

Figure S111. Outputs from the B2 default model rerun with a) volume flux b) detritus volume flux c) concentration d) grainsize. In a, c and d numbers indicate outlet node IDs

### S2.3.8 B2D default

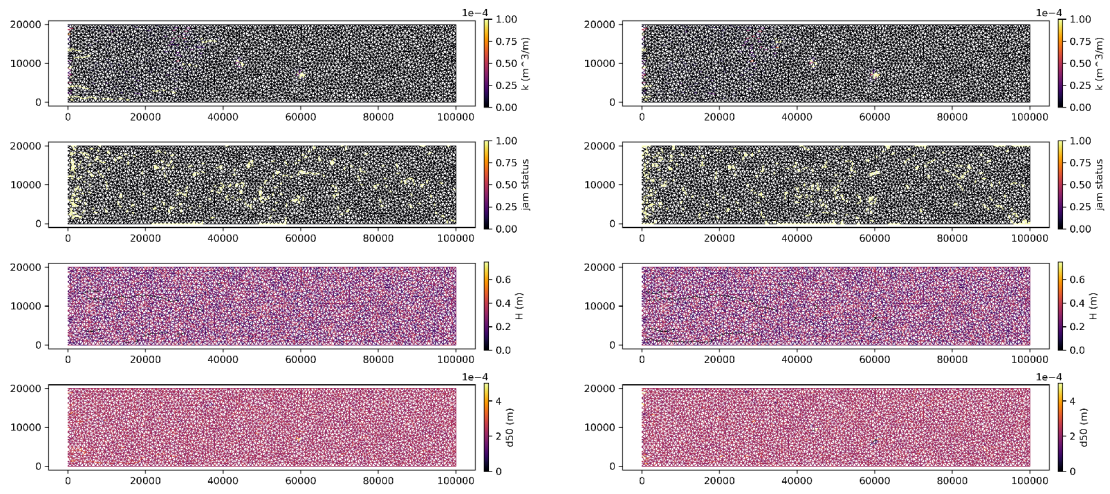

360

**Figure S112.** Results for the B2D default model run at a) week 0 and b) week 25

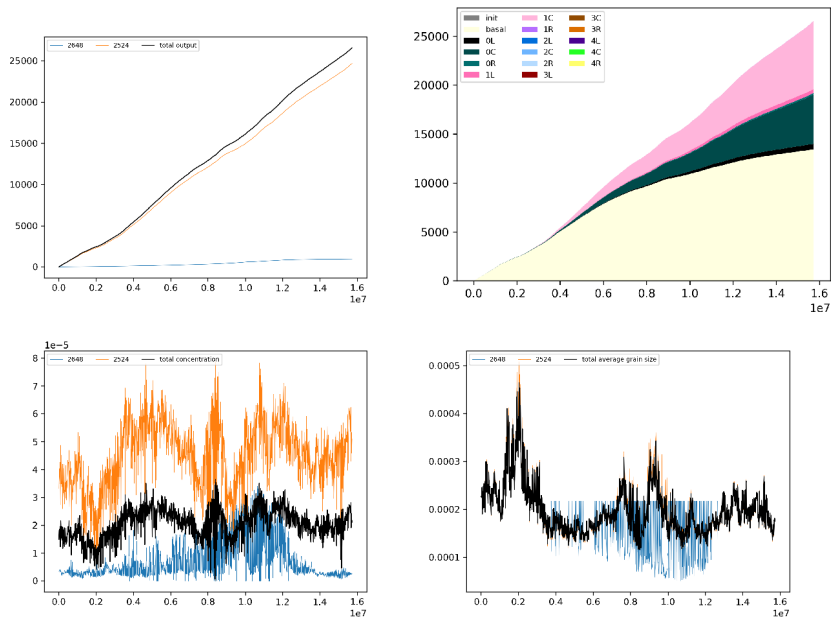

**Figure S113.** Outputs from the B2D default model run with a) volume flux b) detritus volume flux c) concentration d) grainsize. In a, c and d numbers indicate outlet node IDs

### S2.3.9 B3 reference

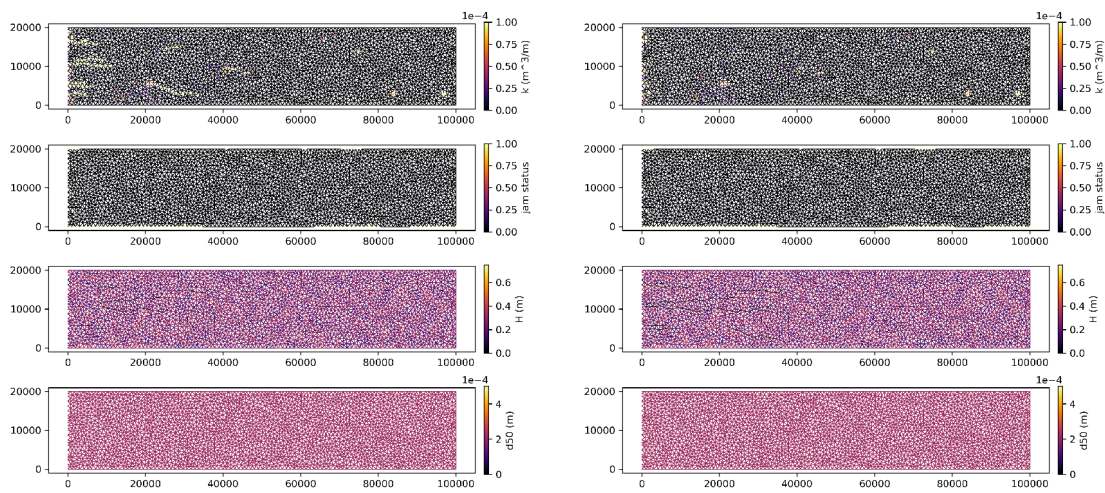

Figure S114. Results for the B3 reference model run at a) week 0 and b) week 25

365

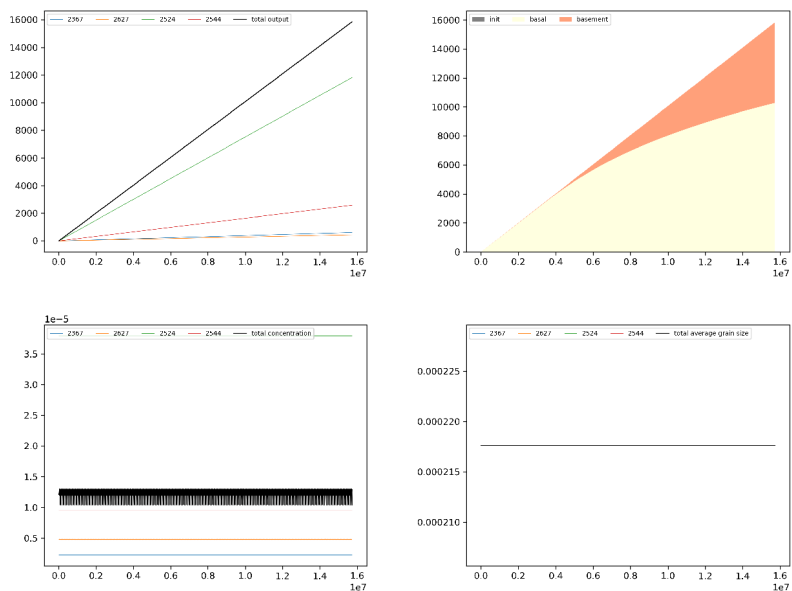

Figure S115. Outputs from the B3 reference model run with a) volume flux b) detritus volume flux c) concentration d) grainsize. In a, c and d numbers indicate outlet node IDs



### S2.3.10 B3 default

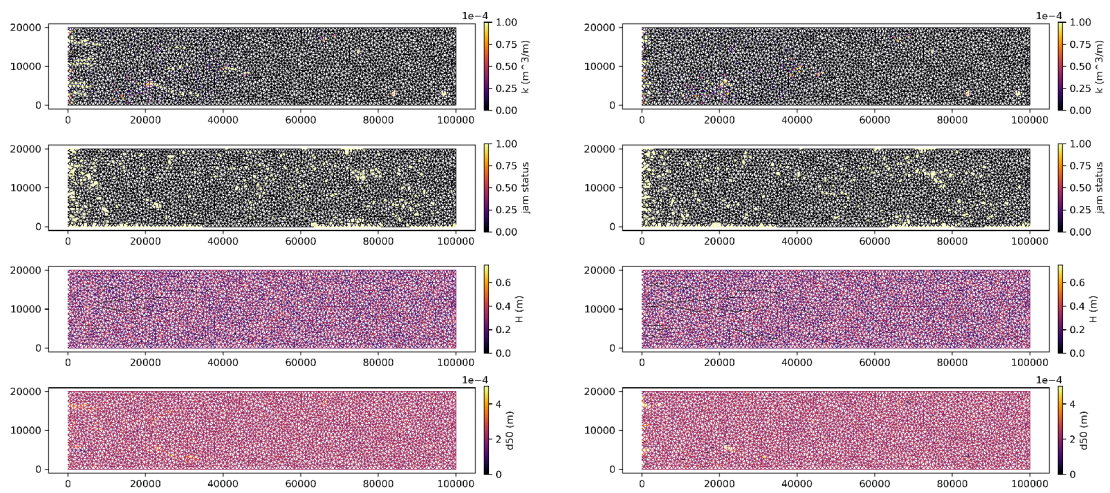

**Figure S116.** Results for the B3 default model run at a) week 0 and b) week 25

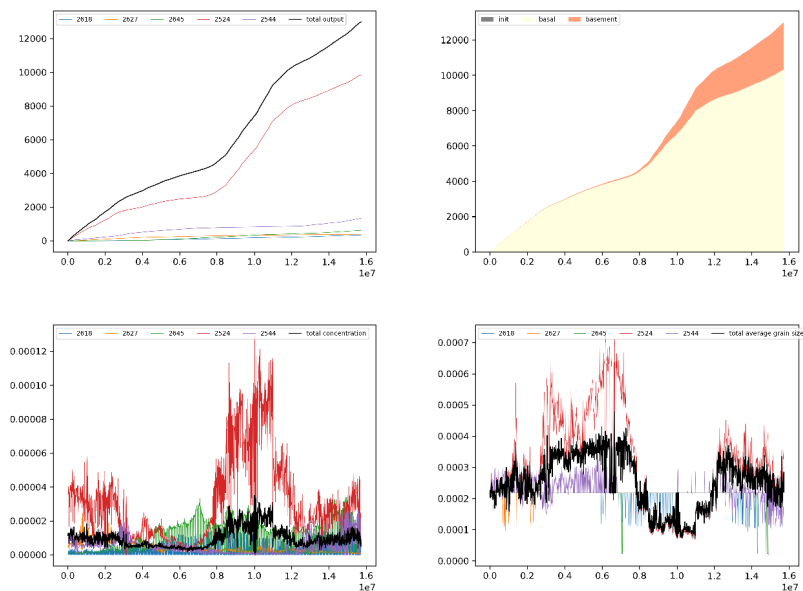

**Figure S117.** Outputs from the B3 default model run with a) volume flux b) detritus volume flux c) concentration d) grainsize. In a, c and d numbers indicate outlet node IDs

### S2.3.11 B3 default rerun

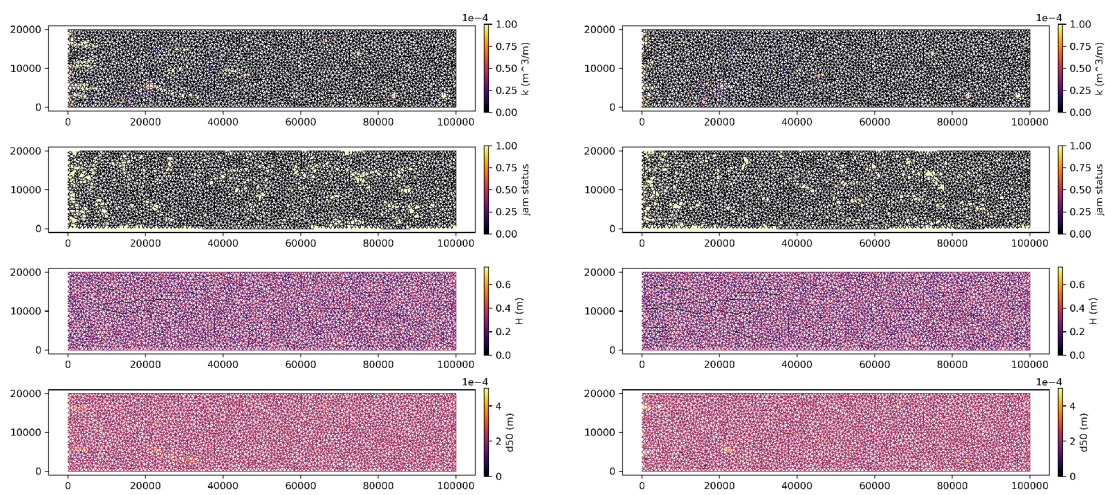

**Figure S118.** Results for the B3 default model rerun at a) week 0 and b) week 25

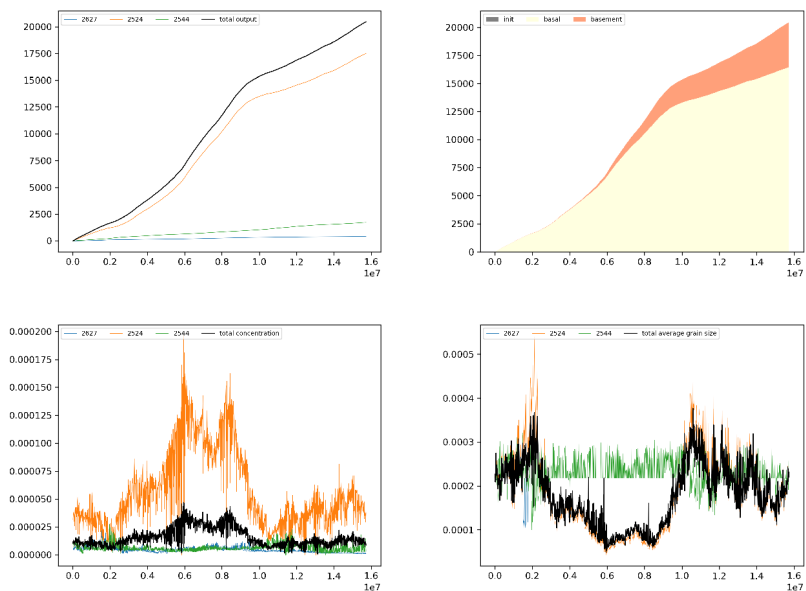

**Figure S119.** Outputs from the B3 default model rerun with a) volume flux b) detritus volume flux c) concentration d) grainsize. In a, c and d numbers indicate outlet node IDs

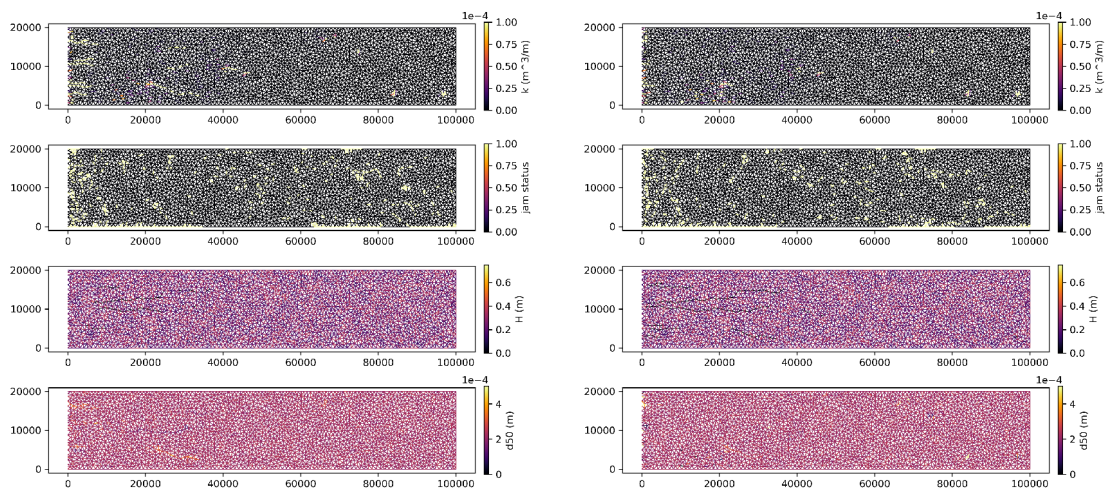

Figure S120. Results for the B3D default model run at a) week 0 and b) week 25

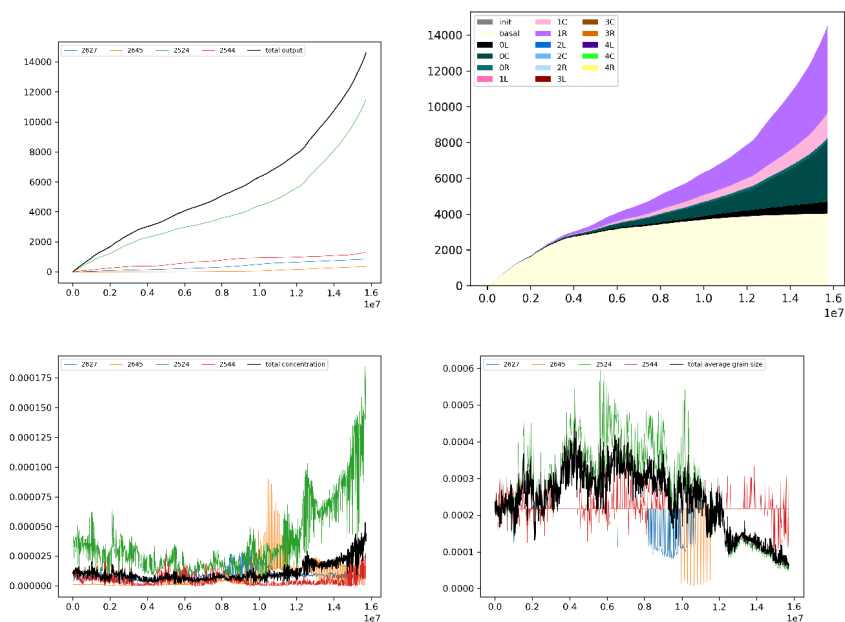

Figure S121. Outputs from the B3D default model run with a) volume flux b) detritus volume flux c) concentration d) grainsize. In a, c and d numbers indicate outlet node IDs

### S2.3.13 B4 reference

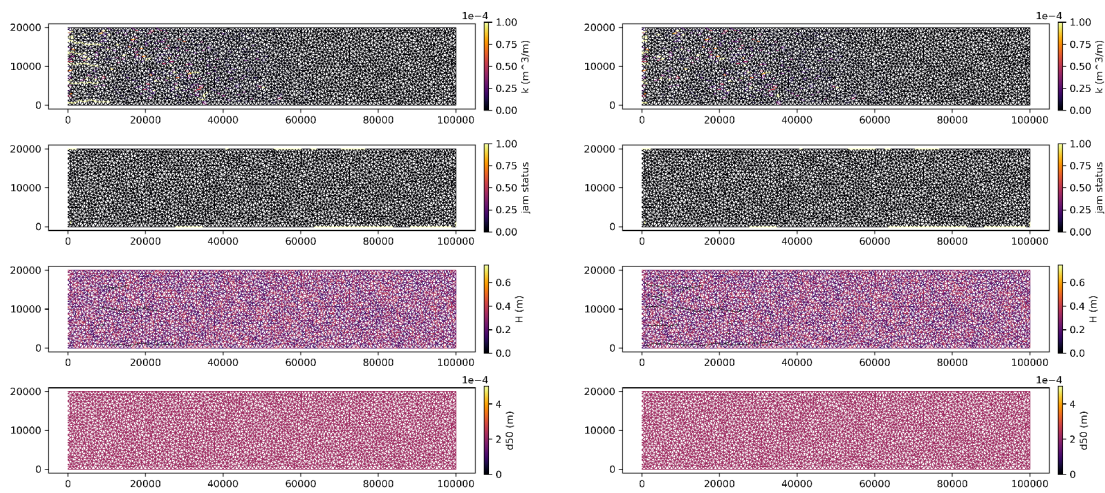

380

**Figure S122.** Results for the B4 reference model run at a) week 0 and b) week 25

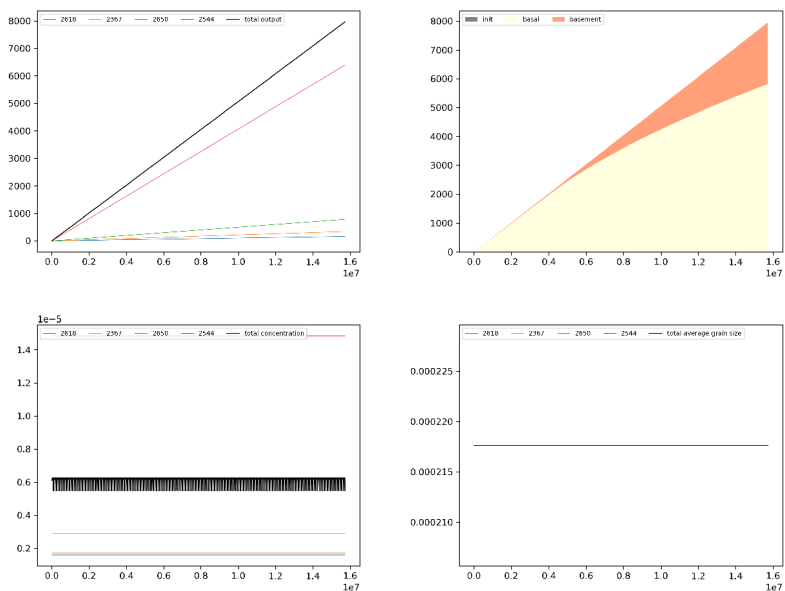

**Figure S123.** Outputs from the B4 reference model run with a) volume flux b) detritus volume flux c) concentration d) grainsize. In a, c and d numbers indicate outlet node IDs

### S2.3.14 B4 default

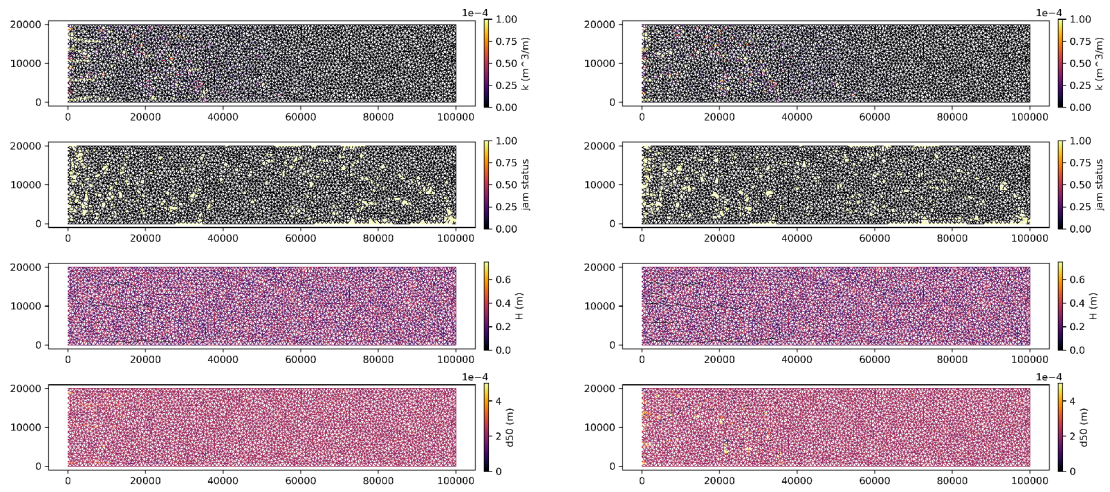

**Figure S124.** Results for the B4 default model run at a) week 0 and b) week 25

385

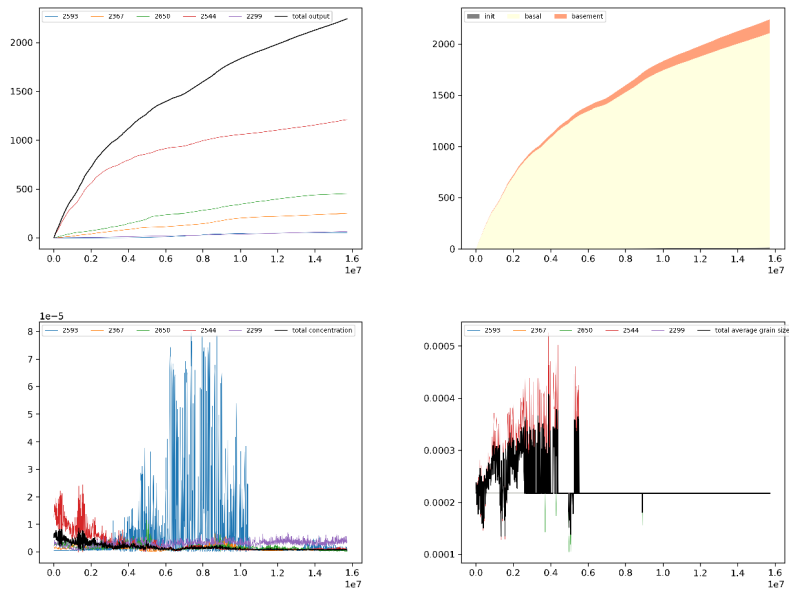

**Figure S125.** Outputs from the B4 default model run with a) volume flux b) detritus volume flux c) concentration d) grainsize. In a, c and d numbers indicate outlet node IDs

### S2.3.15 B4 default rerun

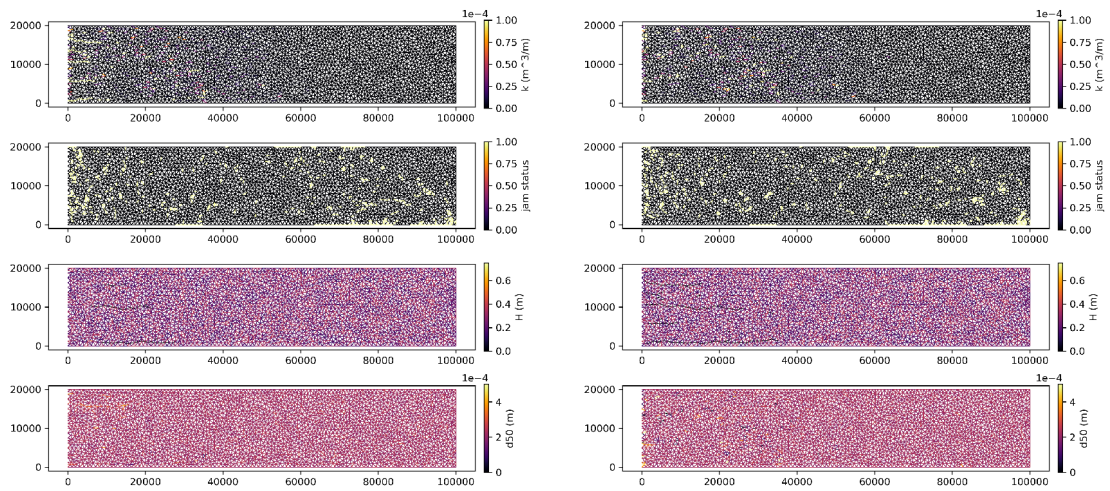

**Figure S126.** Results for the B4 default model rerun at a) week 0 and b) week 25

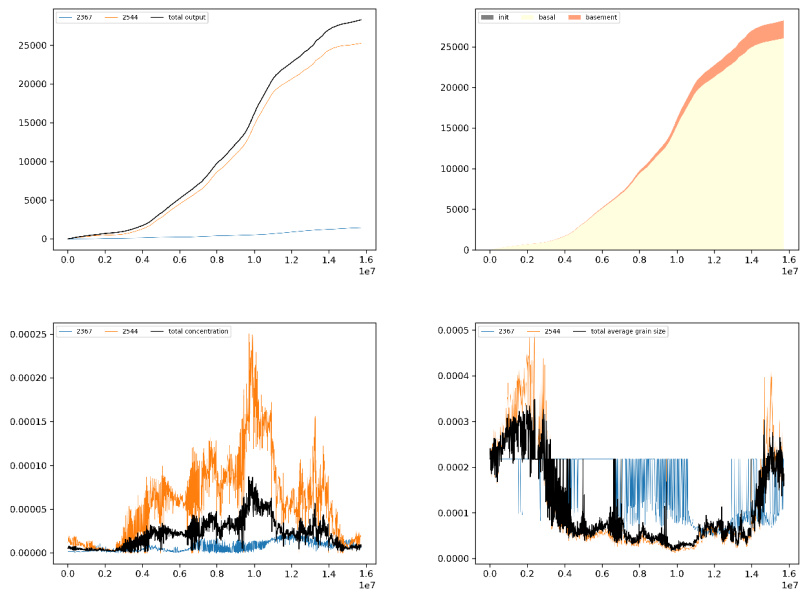

**Figure S127.** Outputs from the B4 default model rerun with a) volume flux b) detritus volume flux c) concentration d) grainsize. In a, c and d numbers indicate outlet node IDs

### S2.3.16 B4D default

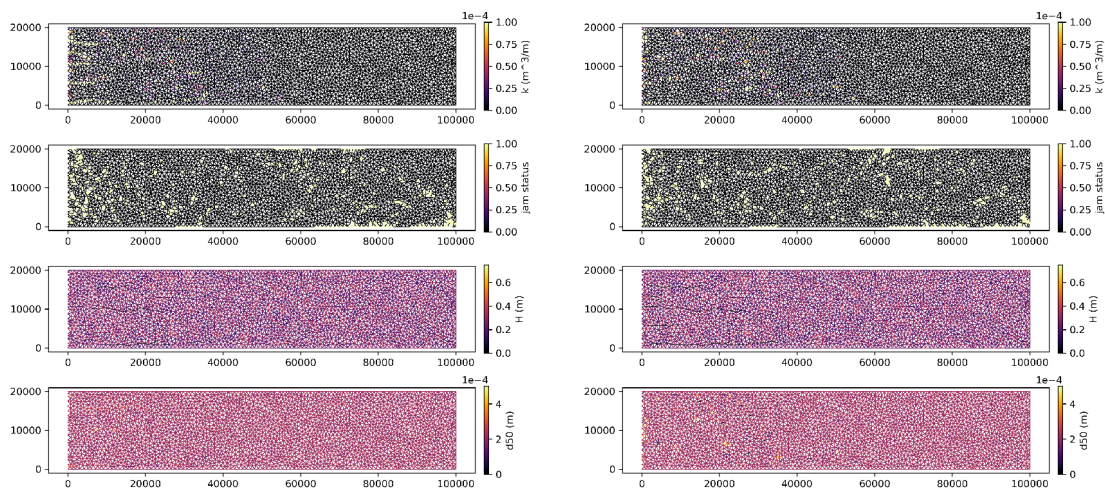

**Figure S128.** Results for the B4D default model run at a) week 0 and b) week 25

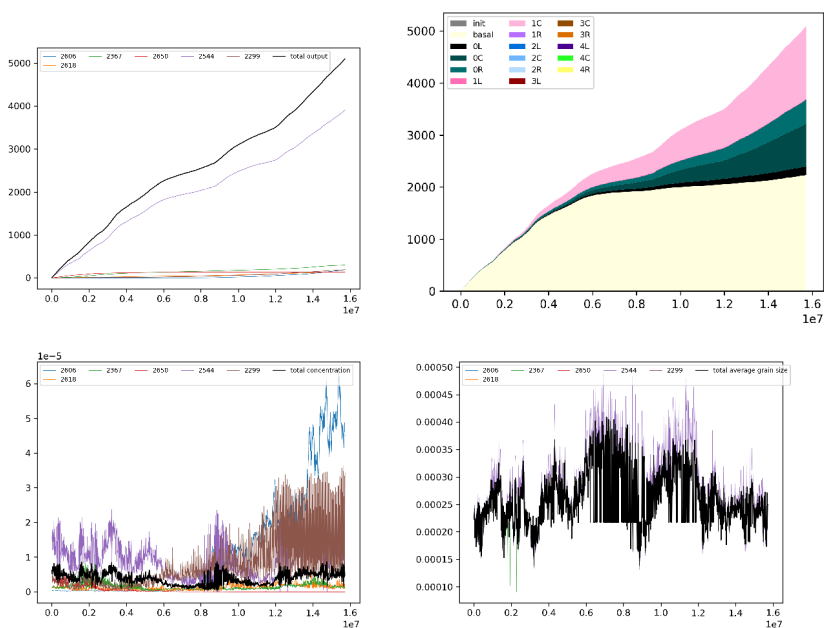

**Figure S129.** Outputs from the B4D default model run with a) volume flux b) detritus volume flux c) concentration d) grainsize. In a, c and d numbers indicate outlet node IDs

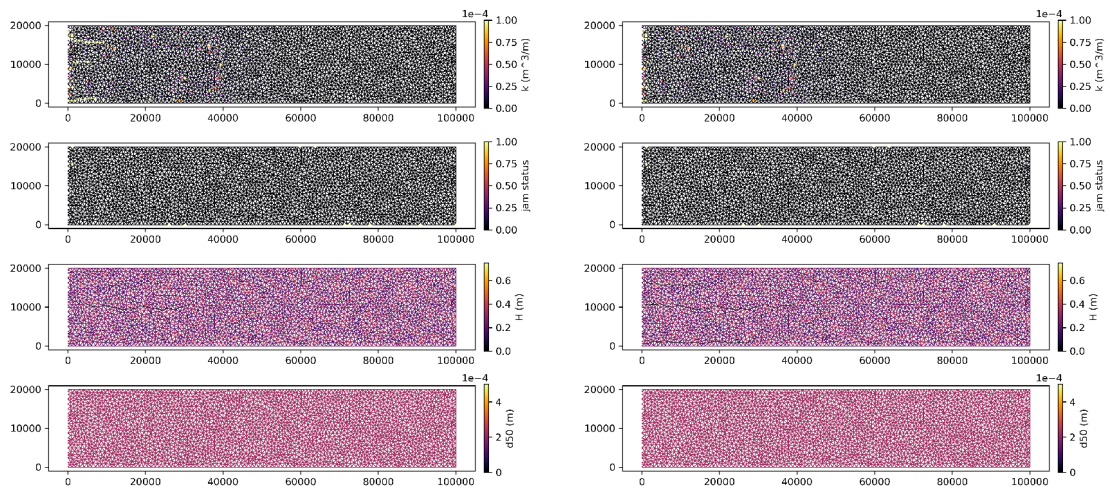

Figure S130. Results for the B5 reference model run at a) week 0 and b) week 25

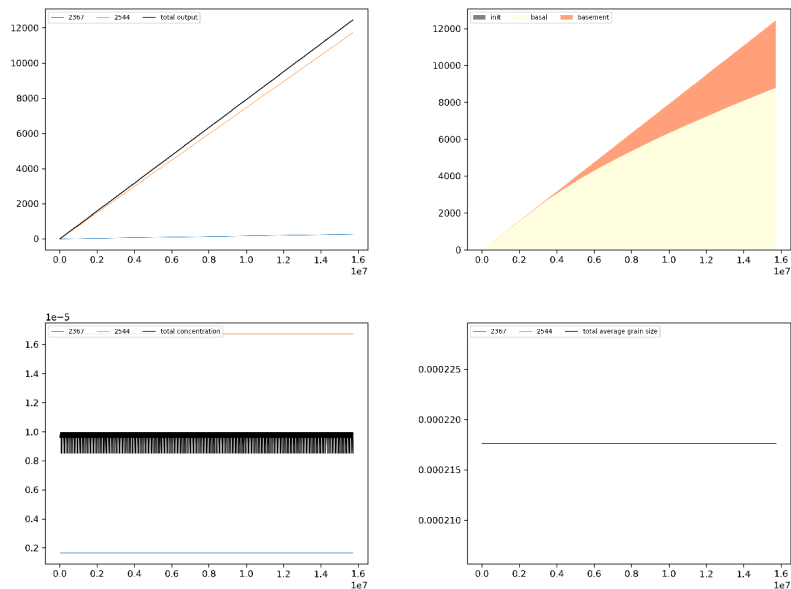

Figure S131. Outputs from the B5 reference model run with a) volume flux b) detritus volume flux c) concentration d) grainsize. In a, c and d numbers indicate outlet node IDs



### S2.3.18 B5 default

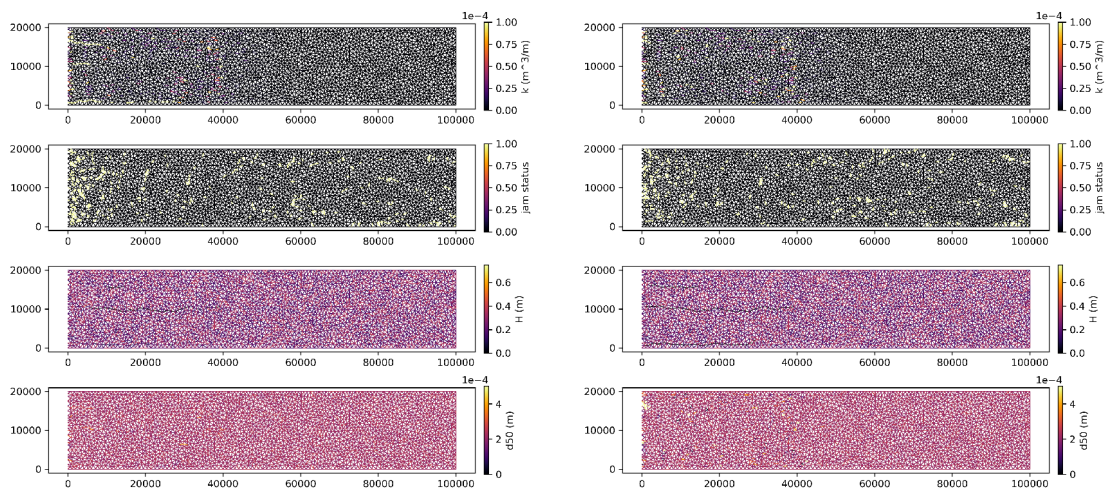

400

**Figure S132.** Results for the B5 default model run at a) week 0 and b) week 25

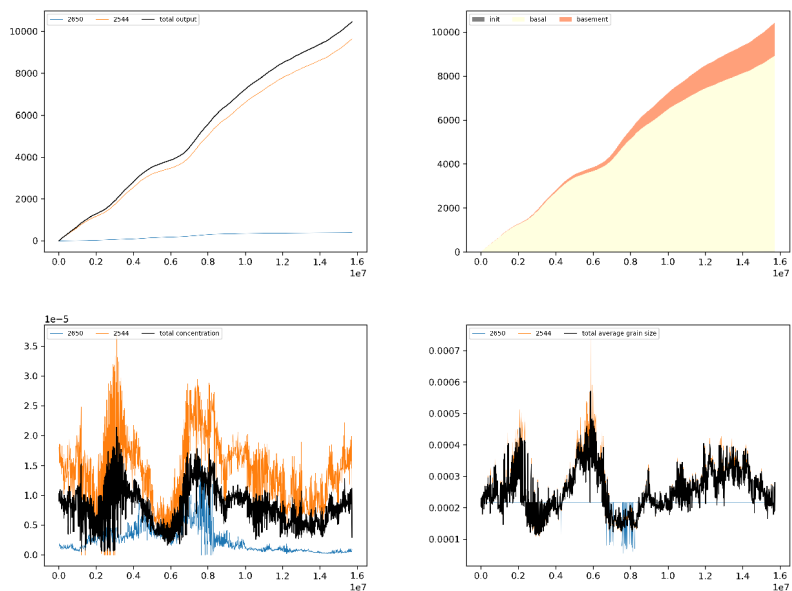

**Figure S133.** Outputs from the B5 default model run with a) volume flux b) detritus volume flux c) concentration d) grainsize. In a, c and d numbers indicate outlet node IDs

### S2.3.19 B5 default rerun

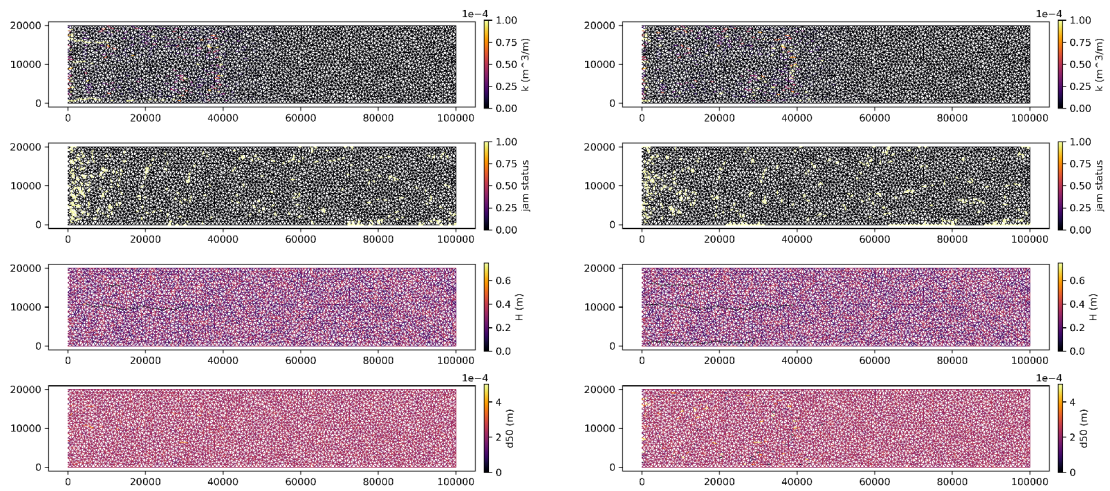

**Figure S134.** Results for the B5 default model rerun at a) week 0 and b) week 25

405

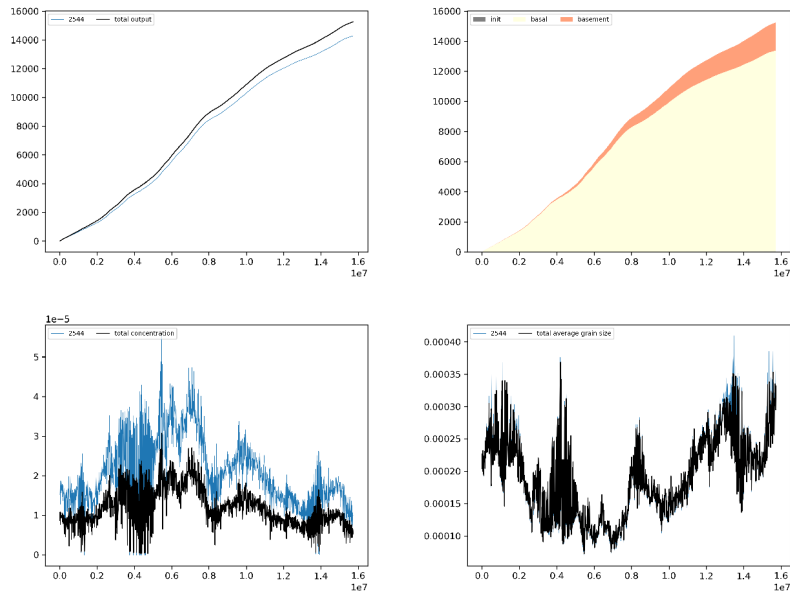

**Figure S135.** Outputs from the B5 default model rerun with a) volume flux b) detritus volume flux c) concentration d) grainsize. In a, c and d numbers indicate outlet node IDs

### S2.3.20 B5D default

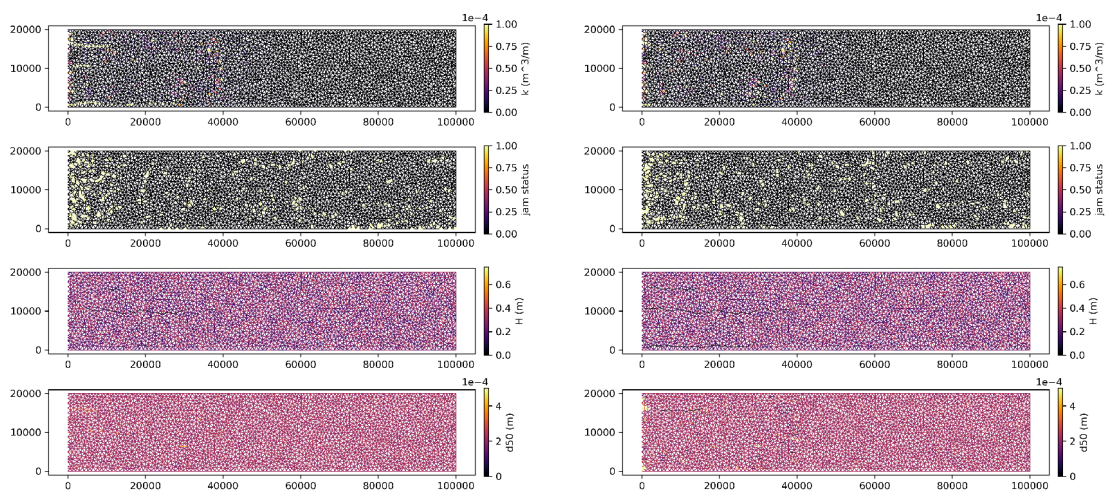

**Figure S136.** Results for the B5D default model run at a) week 0 and b) week 25

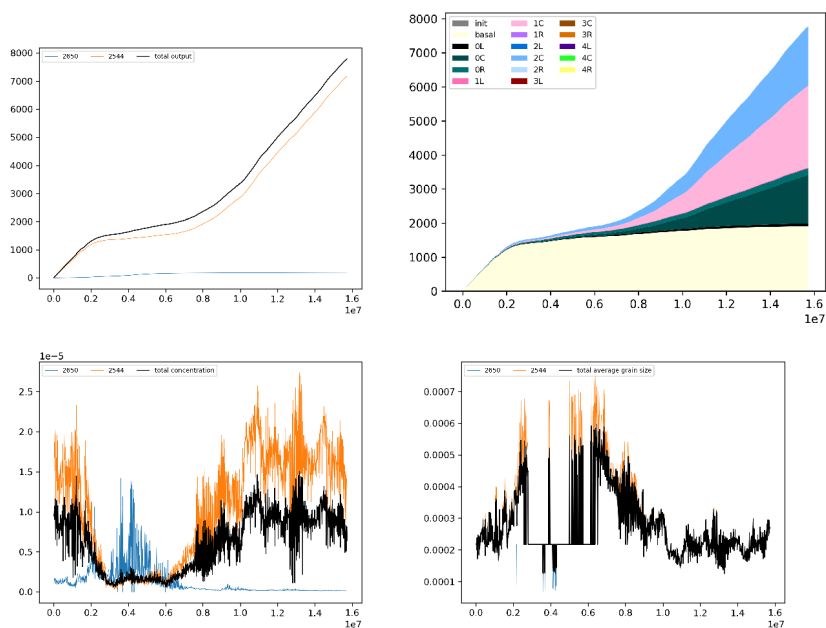

410

**Figure S137.** Outputs from the B5D default model run with a) volume flux b) detritus volume flux c) concentration d) grainsize. In a, c and d numbers indicate outlet node IDs

## S2.4 Experiment Set 4

### S2.4.1 C0 reference

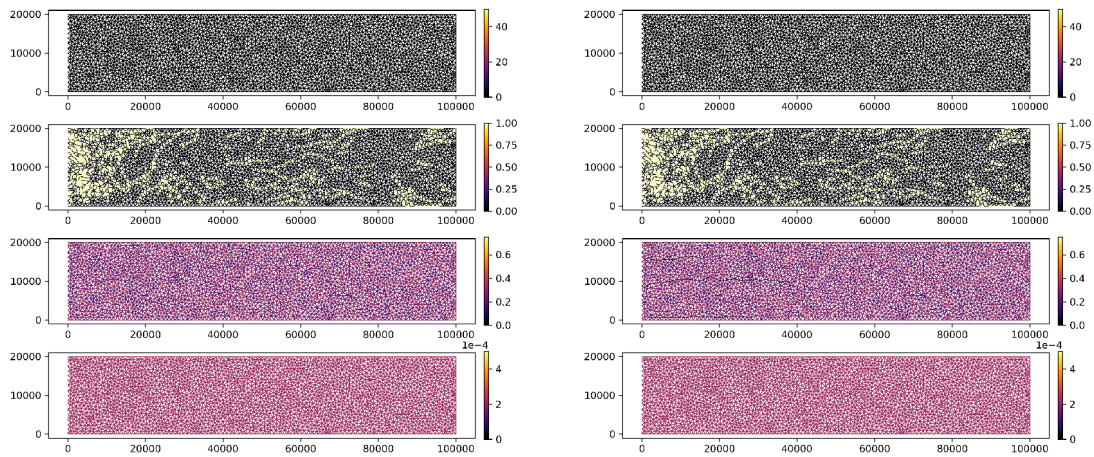

**Figure S138.** Results for the C0 reference model run at a) day 0 and b) day 49

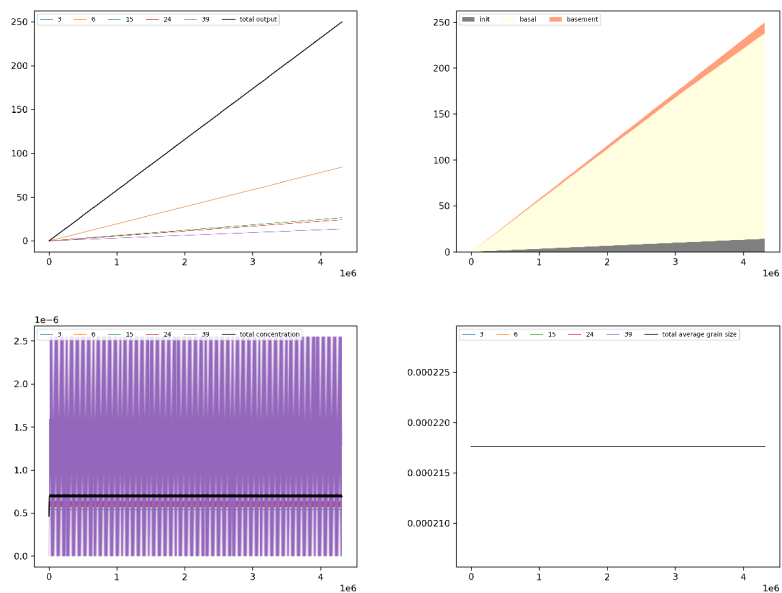

415

**Figure S139.** Outputs from the C0 reference model run with a) volume flux b) detritus volume flux c) concentration d) grainsize. In a, c and d numbers indicate outlet node IDs

## S2.4.2 C0 default

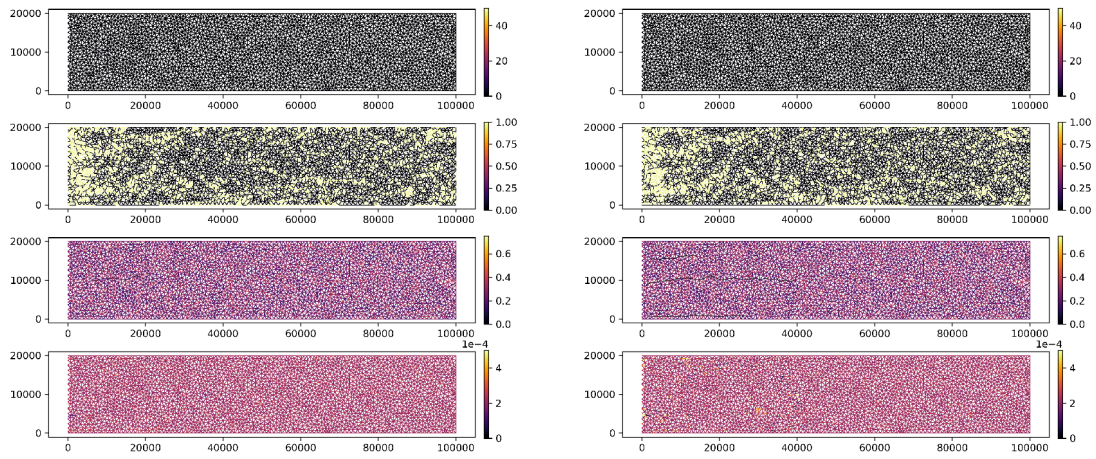

**Figure S140.** Results for the C0 default model run at a) day 0 and b) day 49

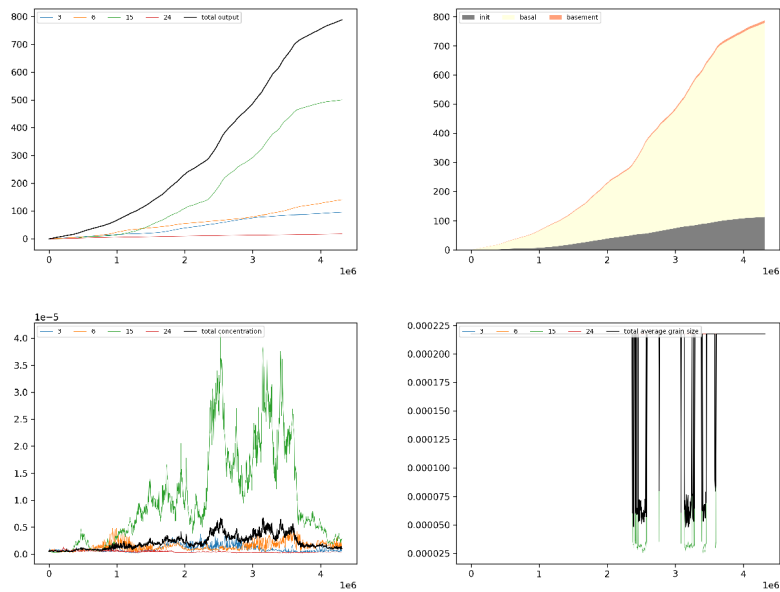

**Figure S141.** Outputs from the C0 default model run with a) volume flux b) detritus volume flux c) concentration d) grainsize. In a, c and d numbers indicate outlet node IDs

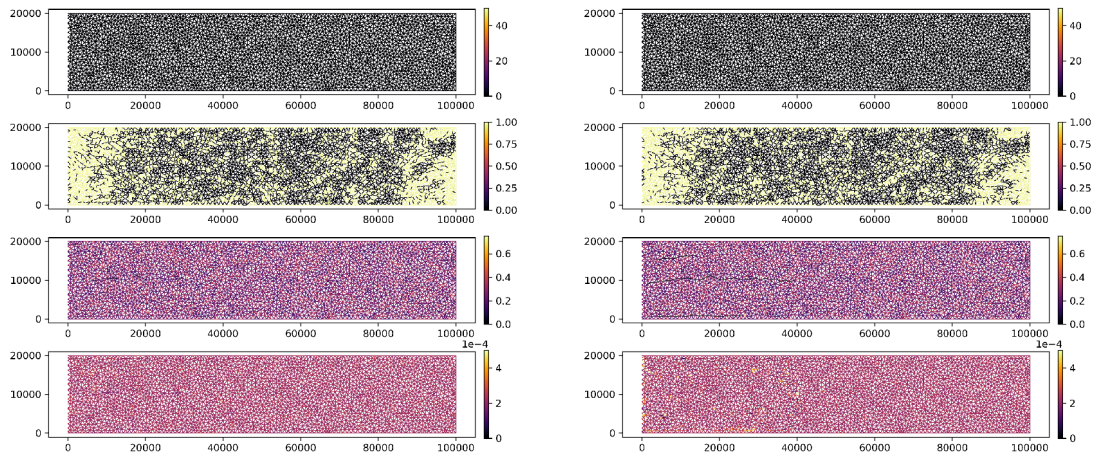

Figure S142. Results for the COD default model run at a) day 0 and b) day 49

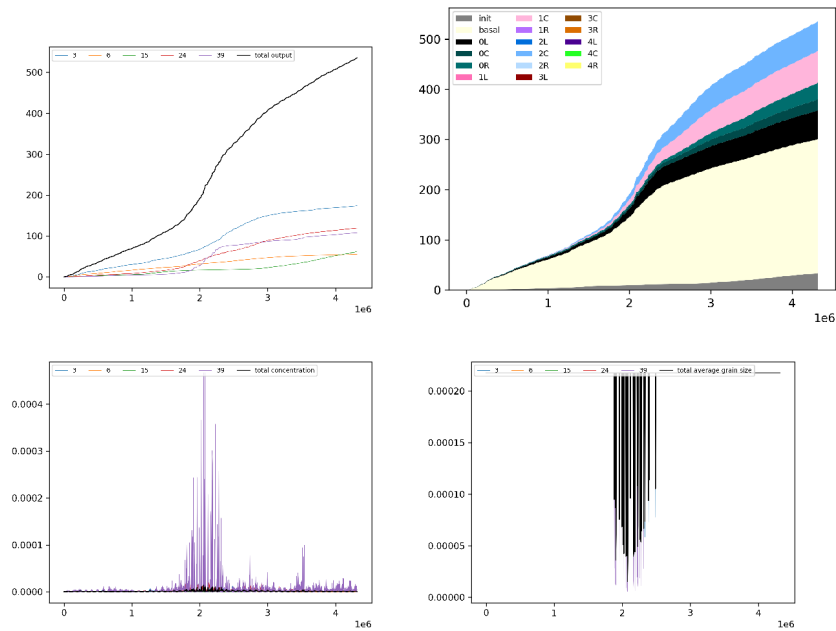

Figure S143. Outputs from the COD default model run with a) volume flux b) detritus volume flux c) concentration d) grainsize. In a, c and d numbers indicate outlet node IDs

## S2.4.4 C1 reference

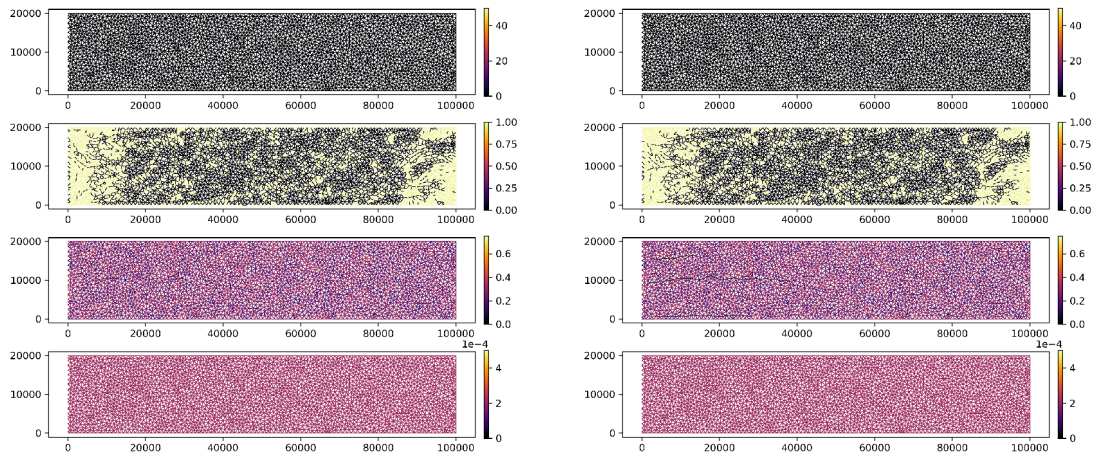

425

**Figure S144.** Results for the C1 reference model run at a) day 0 and b) day 49

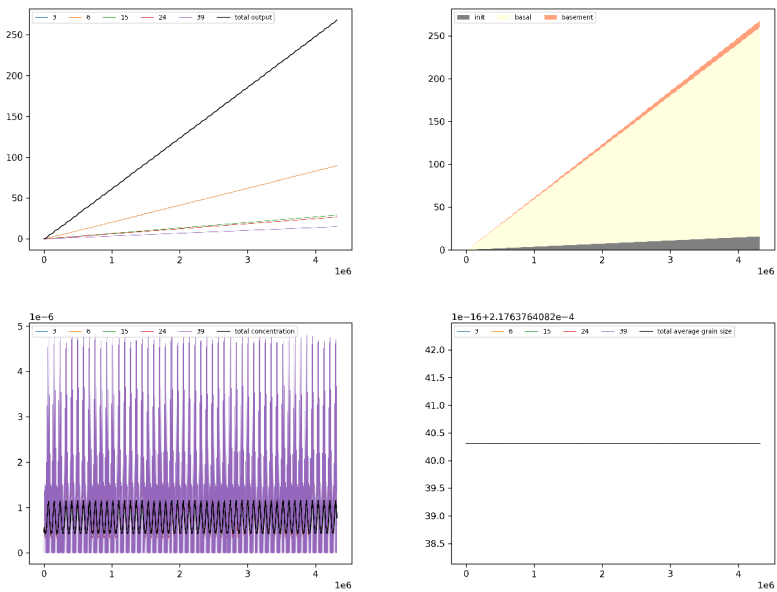

**Figure S145.** Outputs from the C1 reference model run with a) volume flux b) detritus volume flux c) concentration d) grainsize. In a, c and d numbers indicate outlet node IDs

## S2.4.5 C1 default

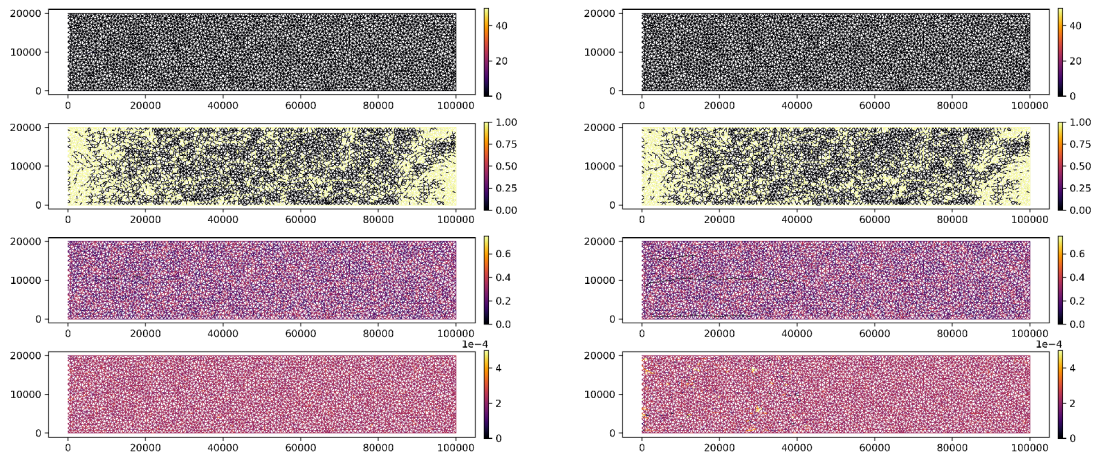

**Figure S146.** Results for the C1 default model run at a) day 0 and b) day 49

430

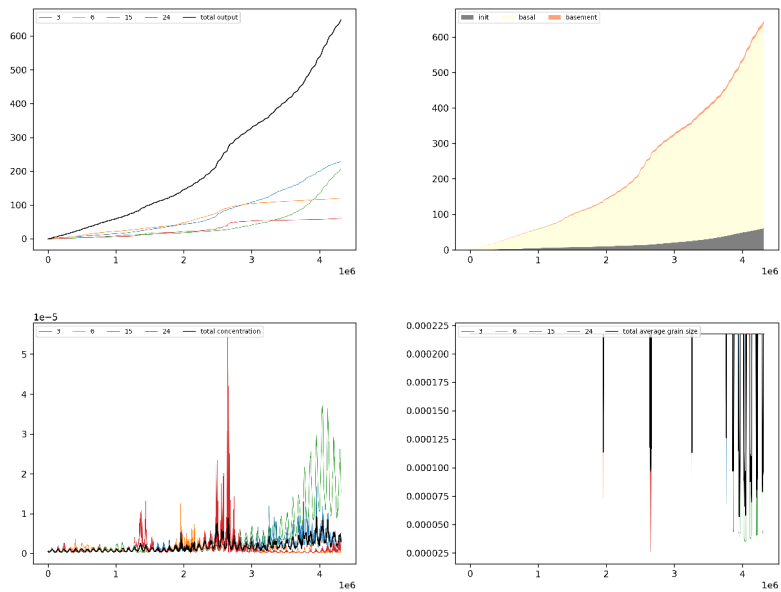

**Figure S147.** Outputs from the C1 default model run with a) volume flux b) detritus volume flux c) concentration d) grainsize. In a, c and d numbers indicate outlet node IDs



## S2.4.6 CID default

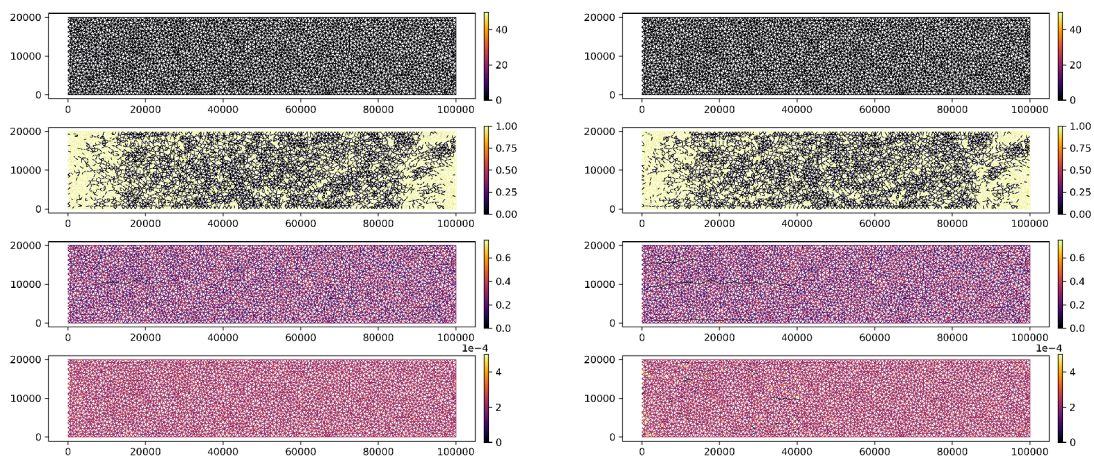

**Figure S148.** Results for the CID default model run at a) day 0 and b) day 49

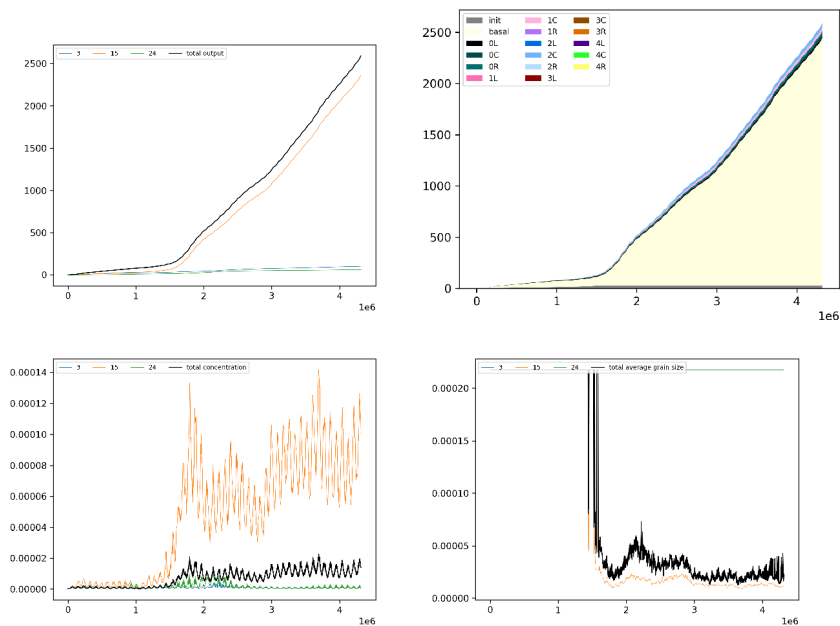

435

**Figure S149.** Outputs from the CID default model run with a) volume flux b) detritus volume flux c) concentration d) grainsize. In a, c and d numbers indicate outlet node IDs

## S2.4.7 C2 reference

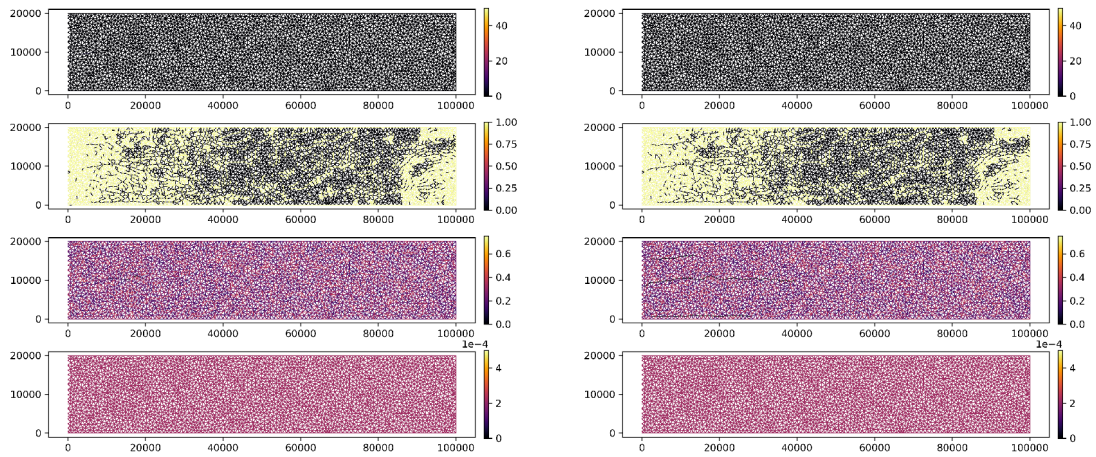

**Figure S150.** Results for the C2 reference model run at a) day 0 and b) day 49

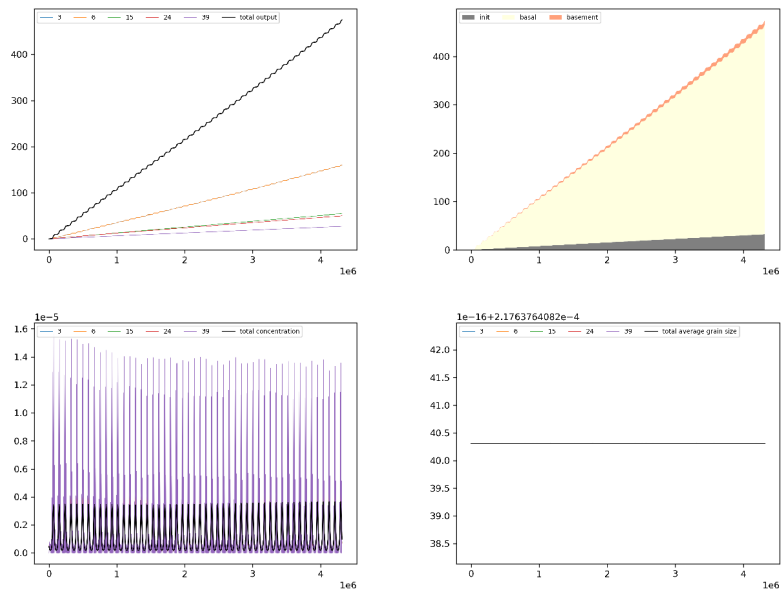

**Figure S151.** Outputs from the C2 reference model run with a) volume flux b) detritus volume flux c) concentration d) grainsize. In a, c and d numbers indicate outlet node IDs

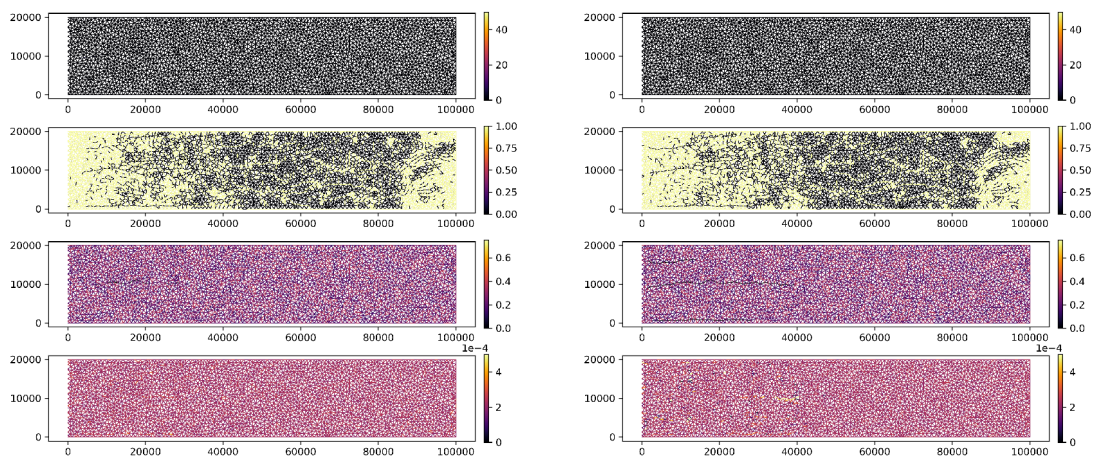

Figure S152. Results for the C2 default model run at a) day 0 and b) day 49

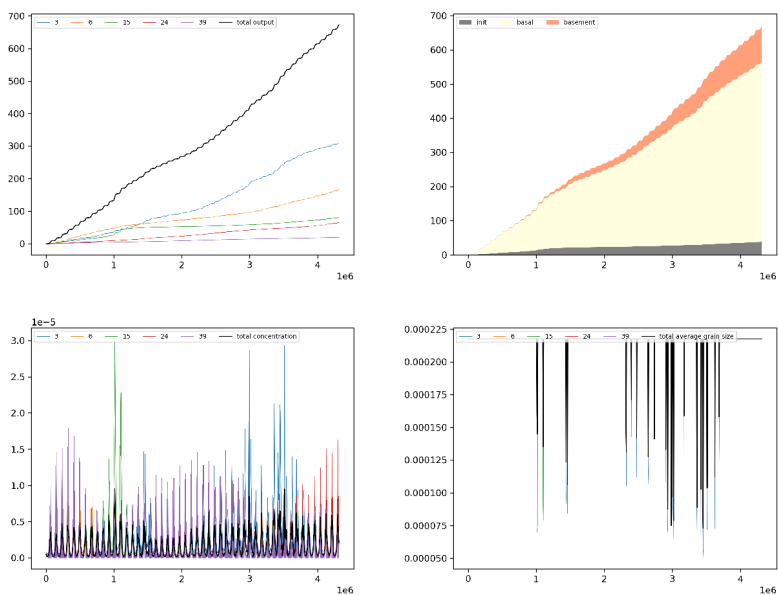

Figure S153. Outputs from the C2 default model run with a) volume flux b) detritus volume flux c) concentration d) grainsize. In a, c and d numbers indicate outlet node IDs

## S2.4.9 C2D default

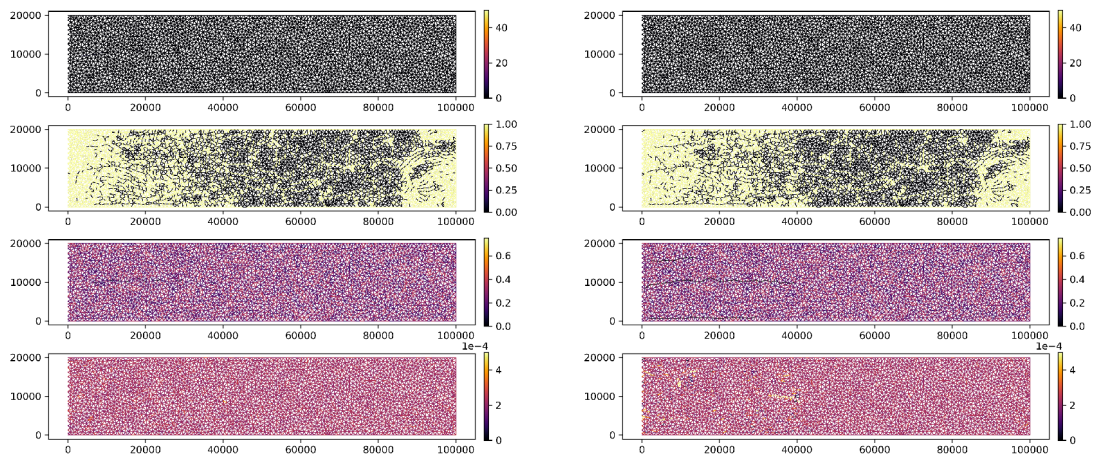

445

**Figure S154.** Results for the C2D default model run at a) day 0 and b) day 49

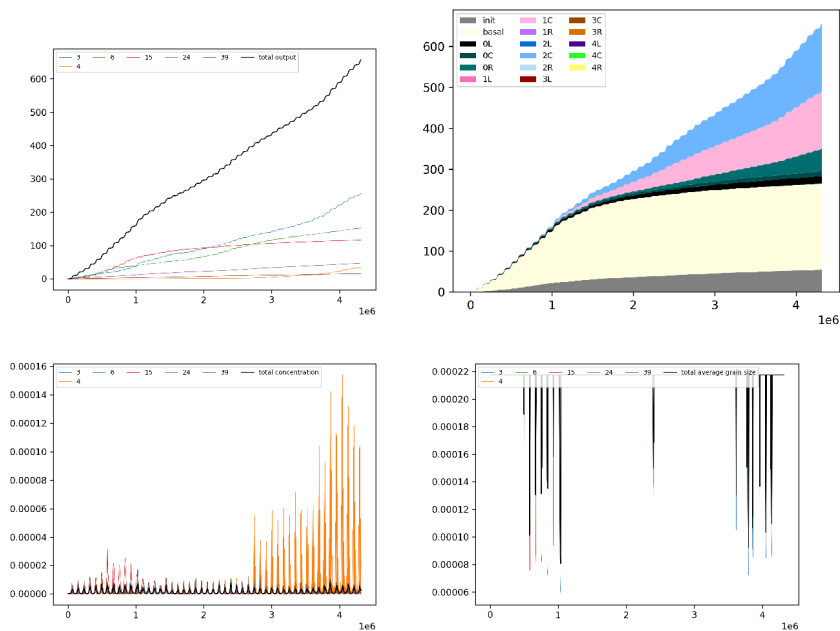

**Figure S155.** Outputs from the C2D default model run with a) volume flux b) detritus volume flux c) concentration d) grainsize. In a, c and d numbers indicate outlet node IDs

## S2.4.10 C3 reference

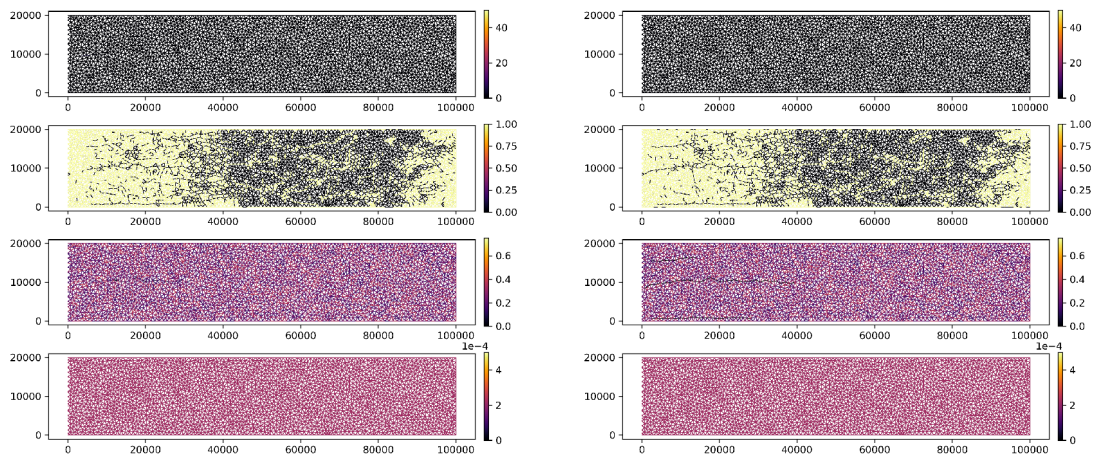

**Figure S156.** Results for the C3 reference model run at a) day 0 and b) day 49

450

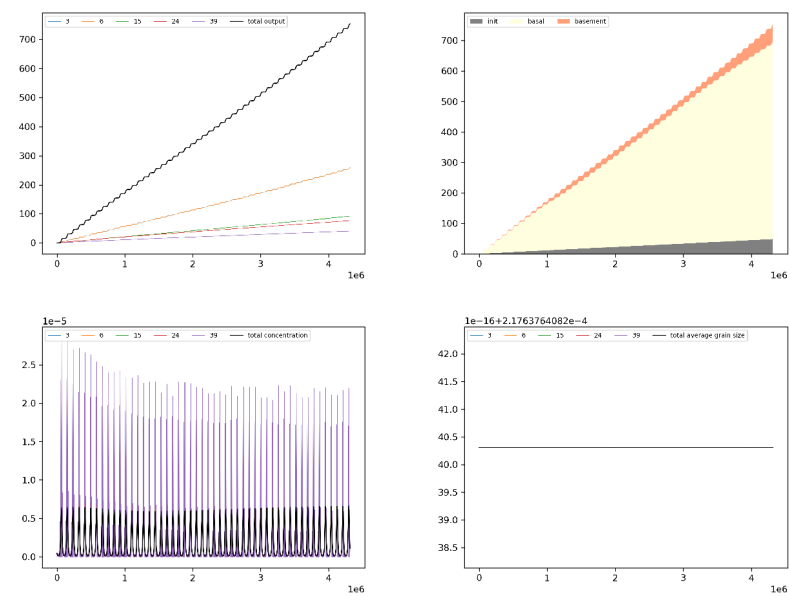

**Figure S157.** Outputs from the C3 reference model run with a) volume flux b) detritus volume flux c) concentration d) grainsize. In a, c and d numbers indicate outlet node IDs

## S2.4.11 C3 default

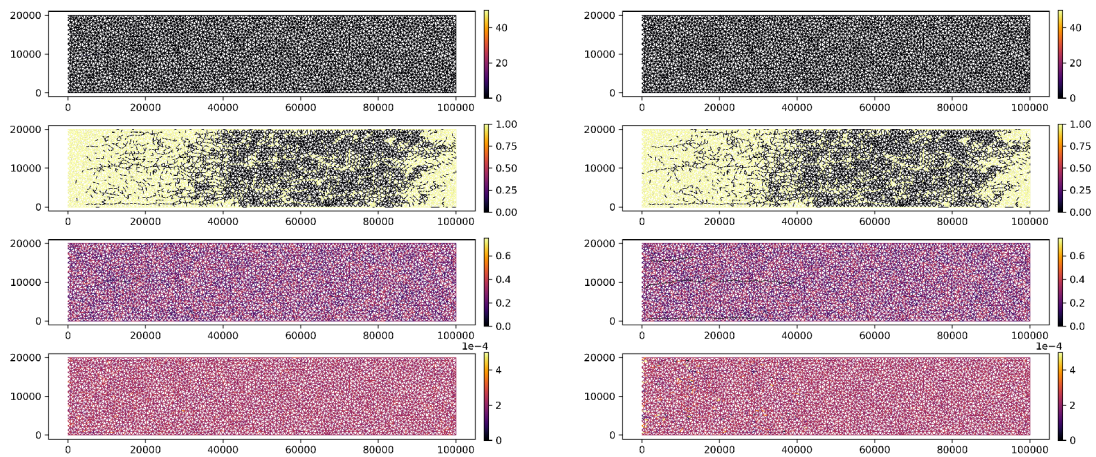

**Figure S158.** Results for the C3 default model run at a) day 0 and b) day 49

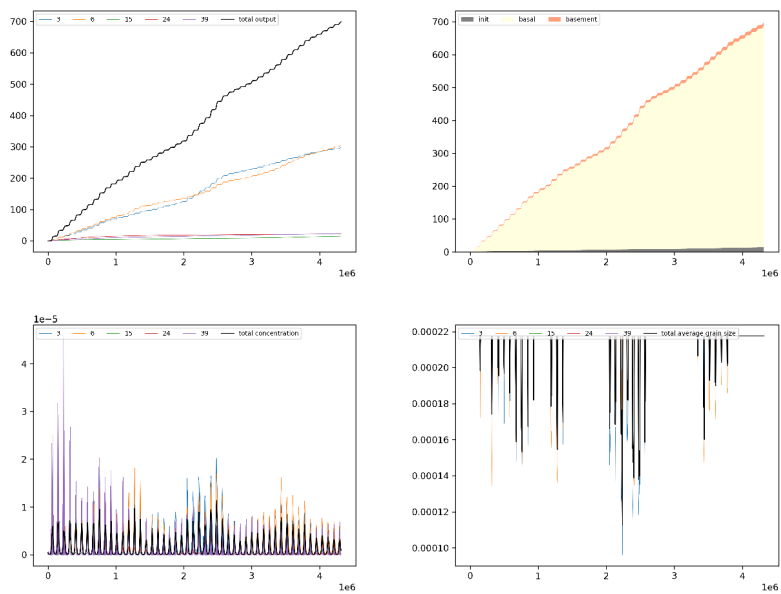

455

**Figure S159.** Outputs from the C3 default model run with a) volume flux b) detritus volume flux c) concentration d) grainsize. In a, c and d numbers indicate outlet node IDs

## S2.4.12 C3D default

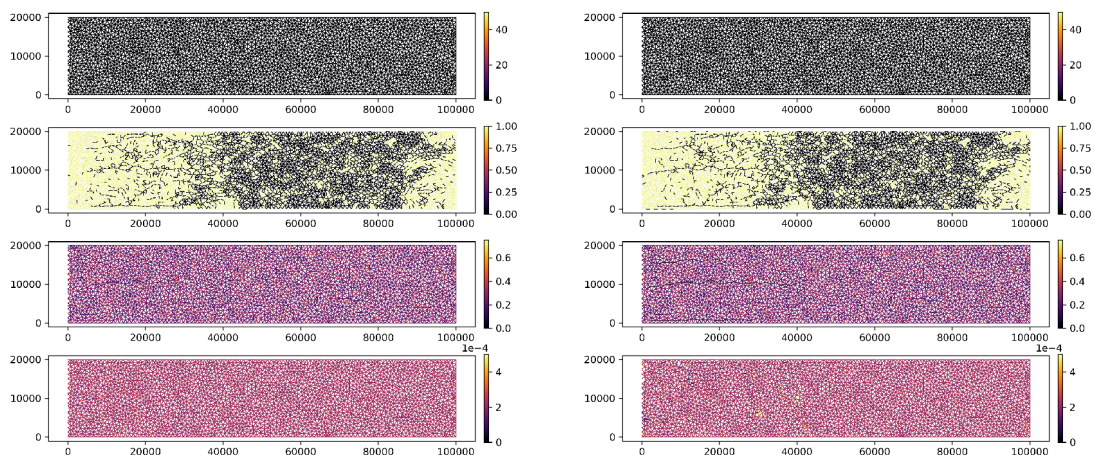

**Figure S160.** Results for the C3D default model run at a) day 0 and b) day 49

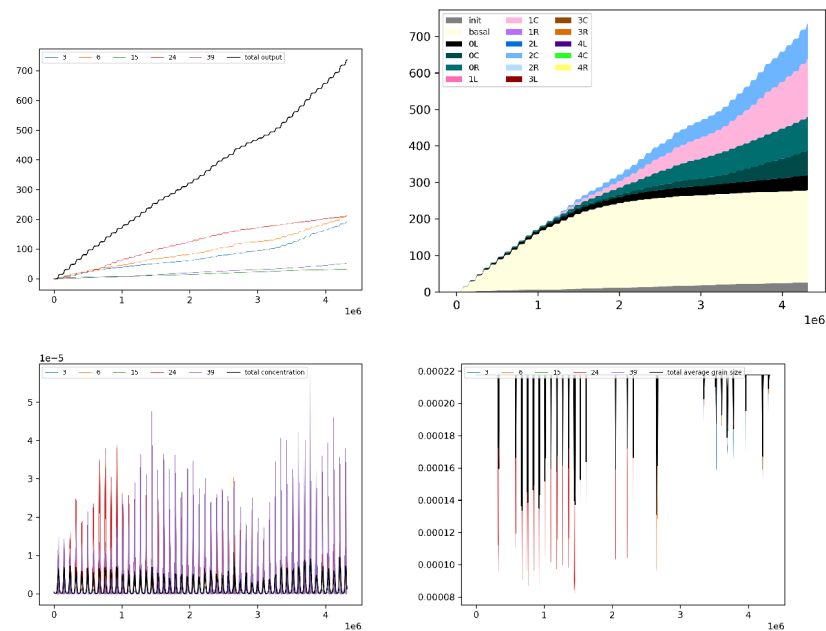

**Figure S161.** Outputs from the C3D default model run with a) volume flux b) detritus volume flux c) concentration d) grainsize. In a, c and d numbers indicate outlet node IDs

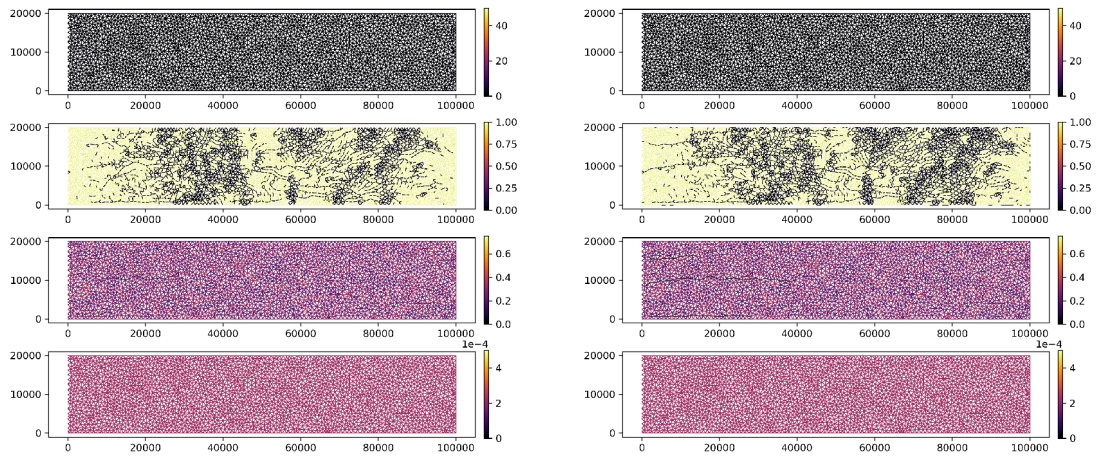

Figure S162. Results for the C4 reference model run at a) day 0 and b) day 49

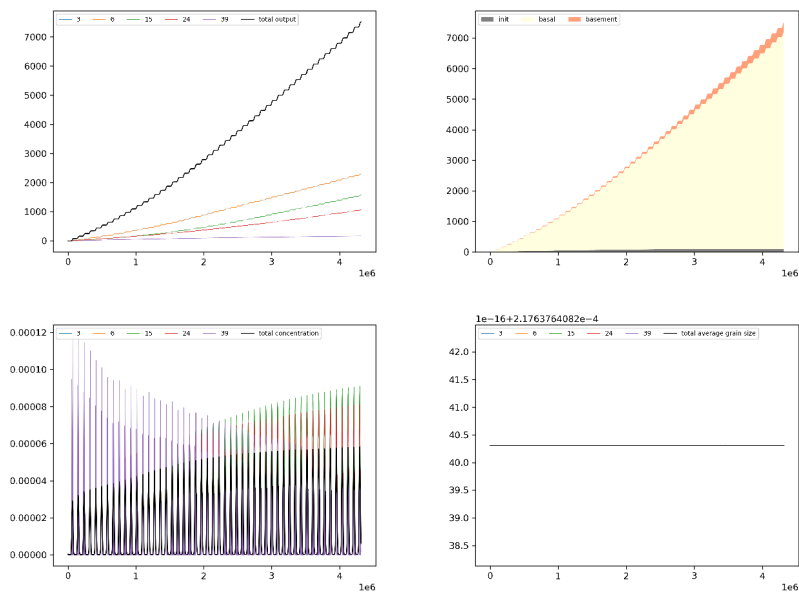

Figure S163. Outputs from the C4 reference model run with a) volume flux b) detritus volume flux c) concentration d) grainsize. In a, c and d numbers indicate outlet node IDs



## S2.4.14 C4 default

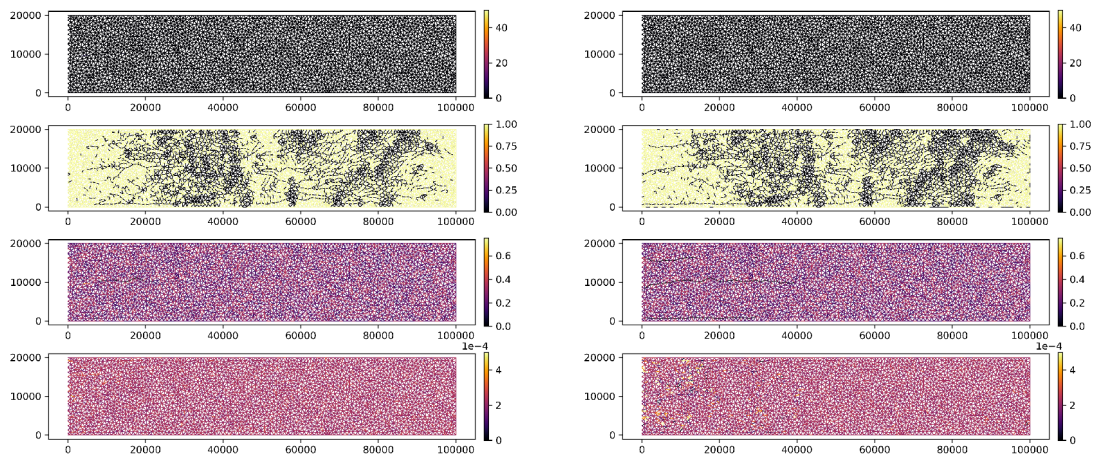

465

**Figure S164.** Results for the C4 default model run at a) day 0 and b) day 49

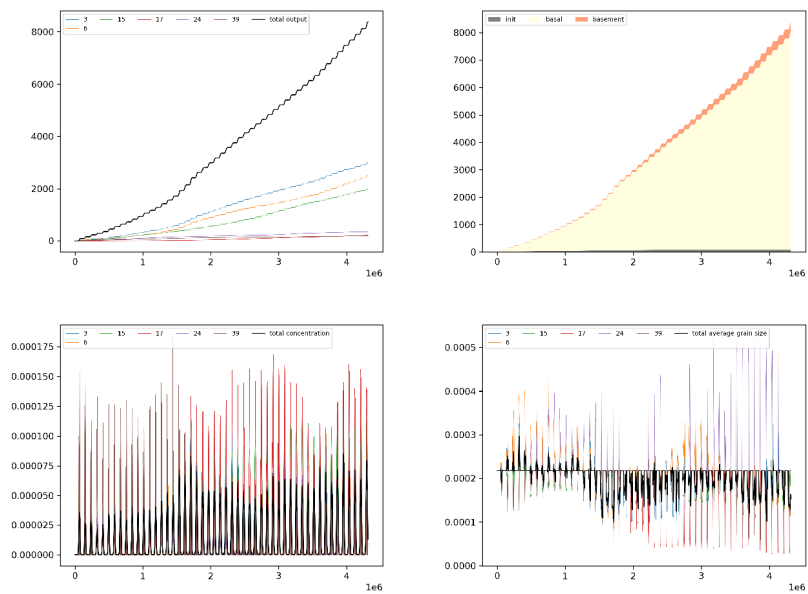

**Figure S165.** Outputs from the C4 default model run with a) volume flux b) detritus volume flux c) concentration d) grainsize. In a, c and d numbers indicate outlet node IDs

## S2.4.15 C4D default

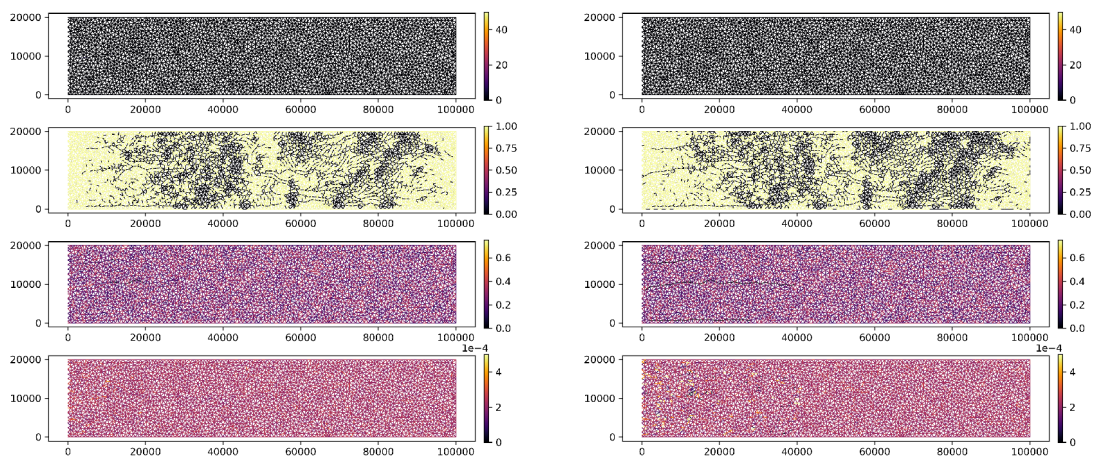

**Figure S166.** Results for the C4D default model run at a) day 0 and b) day 49

470

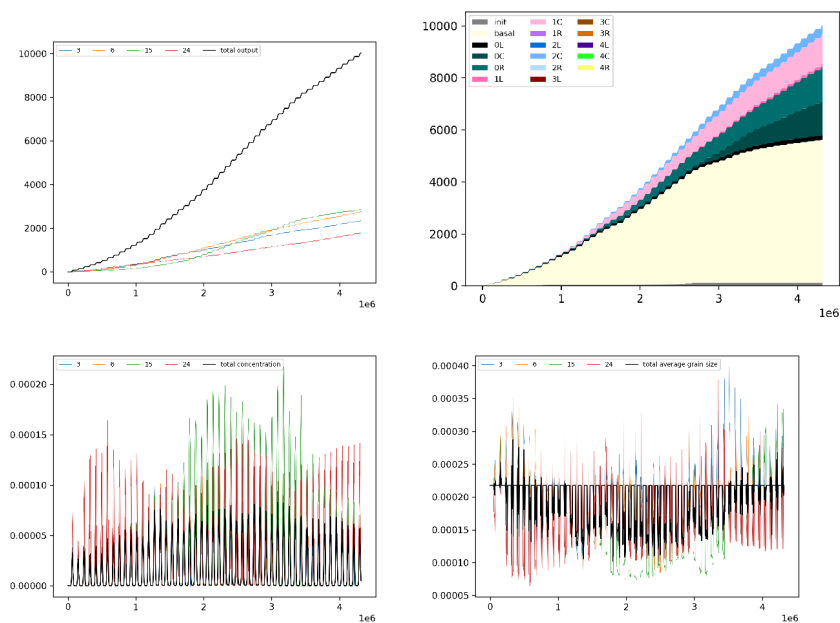

**Figure S167.** Outputs from the C4D default model run with a) volume flux b) detritus volume flux c) concentration d) grainsize. In a, c and d numbers indicate outlet node IDs
